# Supplementary material for: Genomic and Transcriptome Analysis to Identify the Role of the mTOR Pathway in Kidney Renal Clear Cell Carcinoma and Its Potential Therapeutic Significance
Source: Hindawi journal article supplement (doi:10.1155/2021/6613151), 2021-01-01
Supplement: f1 [file 6613151.f1.pdf]

## Supplementary Materials Figures and Legends

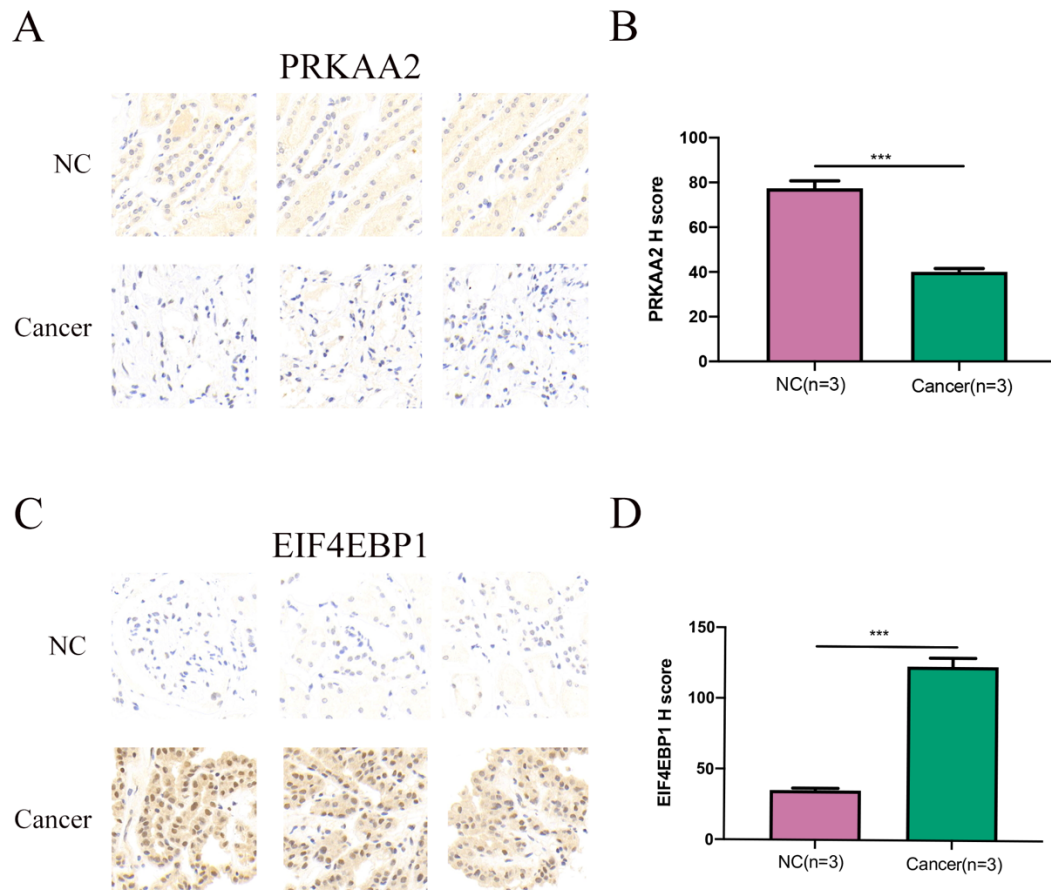

**Figure S1:** The results of immunohistochemistry experiments on the two molecules PRKAA2 and EIF4EBP1. (A-B) Typical immunohistochemical images of PRKAA2 in kidney cancer tissue and normal kidney tissue, and the corresponding semi-quantitative histogram. (C-D) Typical immunohistochemical images of EIF4EBP1 in kidney cancer tissue and normal kidney tissue, and the corresponding semi-quantitative histogram. \*\*\* $p < 0.001$ .

**Table S1: CNV deletion frequency of mTOR pathway genes across 33 cancer types**

|          | ACC     | BLCA    | BRCA    | CESC    | CHOL    | COAD    | DLBC    | ESCA    |
|----------|---------|---------|---------|---------|---------|---------|---------|---------|
| AKT1     | 0.06667 | 0.07971 | 0.07498 | 0.05306 | 0.42424 | 0.19238 | 0       | 0.0625  |
| AKT1S1   | 0.02222 | 0.00966 | 0.02343 | 0.0449  | 0.0303  | 0.01403 | 0       | 0.04167 |
| AKT2     | 0.03333 | 0.01208 | 0.02999 | 0.01633 | 0       | 0.01202 | 0       | 0.03125 |
| CAB39    | 0.06667 | 0.21498 | 0.05904 | 0.26531 | 0       | 0.02405 | 0       | 0.125   |
| CAB39L   | 0.27778 | 0.16184 | 0.23524 | 0.22041 | 0.21212 | 0.02204 | 0.06897 | 0.08333 |
| EEF2K    | 0.01111 | 0.05072 | 0.01125 | 0.02857 | 0       | 0.00802 | 0       | 0.05208 |
| EIF4B    | 0.01111 | 0.02899 | 0.02812 | 0.00408 | 0       | 0       | 0       | 0.02083 |
| EIF4E    | 0.03333 | 0.04348 | 0.06186 | 0.10204 | 0.18182 | 0.05812 | 0.06897 | 0.11458 |
| EIF4EBP1 | 0.11111 | 0.157   | 0.10965 | 0.11837 | 0.06061 | 0.1483  | 0.17241 | 0.14583 |
| EIF4G1   | 0.1     | 0       | 0.01312 | 0       | 0.06061 | 0.00601 | 0       | 0       |
| LAMTOR1  | 0.14444 | 0.03623 | 0.0956  | 0.10612 | 0.0303  | 0.03407 | 0       | 0.08333 |
| LAMTOR2  | 0.1     | 0       | 0.00187 | 0       | 0       | 0       | 0       | 0       |
| LAMTOR3  | 0.03333 | 0.04348 | 0.06092 | 0.10204 | 0.18182 | 0.06212 | 0.06897 | 0.11458 |
| LAMTOR4  | 0.05556 | 0.00966 | 0.04311 | 0.05306 | 0       | 0.00601 | 0       | 0.01042 |
| LAMTOR5  | 0.22222 | 0.00725 | 0.08997 | 0.0449  | 0.12121 | 0.08417 | 0.06897 | 0.15625 |
| MLST8    | 0.02222 | 0.1401  | 0.01312 | 0.0449  | 0.0303  | 0.01804 | 0       | 0.05208 |
| MTOR     | 0.28889 | 0.01691 | 0.14714 | 0.03673 | 0.57576 | 0.12224 | 0.03448 | 0.13542 |
| PPM1A    | 0.05556 | 0.07005 | 0.0806  | 0.01633 | 0.30303 | 0.18036 | 0       | 0.05208 |
| PRKAA1   | 0.01111 | 0.00483 | 0.02437 | 0.00408 | 0       | 0.02004 | 0       | 0.02083 |
| PRKAA2   | 0.23333 | 0.01208 | 0.07123 | 0.02041 | 0.18182 | 0.08417 | 0.03448 | 0.09375 |
| PRKAB1   | 0       | 0.02174 | 0.04592 | 0.00816 | 0.09091 | 0.01002 | 0       | 0.01042 |
| PRKAB2   | 0.1     | 0       | 0.00094 | 0.00408 | 0       | 0.002   | 0       | 0       |
| PRKAG1   | 0       | 0.0314  | 0.02718 | 0.00408 | 0       | 0       | 0.03448 | 0.03125 |
| PRKAG2   | 0.06667 | 0.02899 | 0.06373 | 0.11837 | 0.0303  | 0.01403 | 0.03448 | 0.10417 |
| PRKAG3   | 0.05556 | 0.17633 | 0.04217 | 0.22449 | 0       | 0.00601 | 0.03448 | 0.09375 |
| RHEB     | 0.05556 | 0.02174 | 0.05998 | 0.1102  | 0.0303  | 0.00601 | 0.03448 | 0.09375 |
| RPS6     | 0.18889 | 0.23188 | 0.10309 | 0.06939 | 0.24242 | 0.03808 | 0.03448 | 0.19792 |
| RPS6KB1  | 0.12222 | 0.00242 | 0.0253  | 0.00816 | 0       | 0.03206 | 0       | 0.01042 |
| RPTOR    | 0.12222 | 0.01449 | 0.04686 | 0.0898  | 0       | 0.04609 | 0       | 0.02083 |
| RRAGA    | 0.18889 | 0.22705 | 0.1059  | 0.06531 | 0.24242 | 0.03808 | 0.03448 | 0.19792 |
| RRAGB    | 0.01111 | 0.01691 | 0.0075  | 0.02857 | 0       | 0.01403 | 0       | 0.07292 |
| RRAGC    | 0.18889 | 0.01208 | 0.05436 | 0.00408 | 0.15152 | 0.05812 | 0.03448 | 0.09375 |
| RRAGD    | 0.08889 | 0.09903 | 0.16214 | 0.12245 | 0.45455 | 0.03607 | 0.2069  | 0.04167 |
| SLC38A9  | 0       | 0.12319 | 0.11621 | 0.1102  | 0       | 0.05411 | 0       | 0.19792 |
| STK11    | 0.02222 | 0.0942  | 0.1059  | 0.21224 | 0       | 0.04208 | 0       | 0.10417 |
| STRADA   | 0.13333 | 0.00725 | 0.02156 | 0.01224 | 0       | 0.02806 | 0       | 0.03125 |
| STRADB   | 0.05556 | 0.11353 | 0.03187 | 0.15918 | 0       | 0.00601 | 0.03448 | 0.04167 |
| TSC1     | 0.01111 | 0.18116 | 0.06842 | 0.02041 | 0.24242 | 0.02004 | 0       | 0.0625  |
| TSC2     | 0.02222 | 0.13285 | 0.01312 | 0.04898 | 0.0303  | 0.01804 | 0       | 0.05208 |
| YWHAB    | 0       | 0       | 0.01593 | 0.02857 | 0.0303  | 0.00401 | 0       | 0       |

| GBM     | HNSC    | KICH    | KIRC    | KIRP    | LGG     | LIHC    | LUAD    | LUSC    |
|---------|---------|---------|---------|---------|---------|---------|---------|---------|
| 0.16242 | 0.07759 | 0.04545 | 0.12733 | 0.10526 | 0.11069 | 0.17414 | 0.05019 | 0.03817 |
| 0.07803 | 0.05172 | 0       | 0.0034  | 0.01645 | 0.4015  | 0.03166 | 0.05212 | 0.05916 |
| 0.0414  | 0.05172 | 0.01515 | 0.0034  | 0.01316 | 0.3546  | 0.01847 | 0.02124 | 0.03817 |
| 0.00478 | 0.09483 | 0.36364 | 0.04244 | 0.04276 | 0.0469  | 0.02902 | 0.01158 | 0.06679 |
| 0.2707  | 0.09483 | 0.4697  | 0.02547 | 0.03618 | 0.13133 | 0.30607 | 0.08494 | 0.12595 |
| 0.05573 | 0.00862 | 0.01515 | 0       | 0       | 0.00938 | 0.11609 | 0.00772 | 0.03626 |
| 0.04777 | 0       | 0       | 0       | 0       | 0.0394  | 0.00792 | 0.00965 | 0.00382 |
| 0.02548 | 0.09483 | 0       | 0.01528 | 0.04276 | 0.06191 | 0.24538 | 0.02896 | 0.07252 |
| 0.03662 | 0.06897 | 0.16667 | 0.08829 | 0.05263 | 0.01313 | 0.44855 | 0.12162 | 0.05916 |
| 0.00478 | 0       | 0.04545 | 0.03226 | 0.00329 | 0.01313 | 0.00792 | 0.02896 | 0       |
| 0.04299 | 0.09483 | 0.09091 | 0.00679 | 0.01645 | 0.0075  | 0.03694 | 0.00965 | 0.03435 |
| 0       | 0.00862 | 0.57576 | 0.02037 | 0.03289 | 0       | 0       | 0       | 0       |
| 0.02548 | 0.09483 | 0       | 0.01698 | 0.04276 | 0.06191 | 0.24802 | 0.0251  | 0.07252 |
| 0.00159 | 0.00862 | 0       | 0       | 0       | 0.00375 | 0.02639 | 0.00965 | 0.00954 |
| 0.01592 | 0.09483 | 0.63636 | 0.04244 | 0.07895 | 0.32458 | 0.08443 | 0.06371 | 0.08588 |
| 0.02229 | 0.03448 | 0.01515 | 0       | 0.00329 | 0       | 0.14512 | 0.01351 | 0.06107 |
| 0.07643 | 0.09483 | 0.66667 | 0.06282 | 0.11513 | 0.32458 | 0.22955 | 0.03089 | 0.09351 |
| 0.19108 | 0.05172 | 0.01515 | 0.13413 | 0.09211 | 0.10882 | 0.15831 | 0.03282 | 0.05153 |
| 0.01115 | 0       | 0.09091 | 0.0017  | 0.00658 | 0.02064 | 0       | 0.00772 | 0.00954 |
| 0.01274 | 0.05172 | 0.71212 | 0.05263 | 0.07566 | 0.32458 | 0.09763 | 0.01931 | 0.04771 |
| 0.0207  | 0.00862 | 0       | 0.0017  | 0       | 0.02627 | 0.0343  | 0.01544 | 0.0229  |
| 0.00159 | 0       | 0.56061 | 0.02037 | 0.03618 | 0.0075  | 0.00264 | 0       | 0       |
| 0.06529 | 0.00862 | 0       | 0       | 0       | 0.04503 | 0.00792 | 0.00579 | 0.00382 |
| 0.00478 | 0.10345 | 0       | 0.0034  | 0.00329 | 0       | 0.04485 | 0.02124 | 0.04389 |
| 0       | 0.11207 | 0.39394 | 0.03396 | 0.02961 | 0.01501 | 0.02639 | 0.01158 | 0.0687  |
| 0.00159 | 0.10345 | 0       | 0.0034  | 0.00329 | 0       | 0.04222 | 0.00965 | 0.03435 |
| 0.47293 | 0.24138 | 0.07576 | 0.05263 | 0.07895 | 0.17261 | 0.14248 | 0.12934 | 0.15267 |
| 0.00478 | 0       | 0.57576 | 0.01019 | 0.00329 | 0.00375 | 0       | 0.00579 | 0.00954 |
| 0.01752 | 0.02586 | 0.56061 | 0.01528 | 0.00329 | 0.00938 | 0.00792 | 0.00965 | 0.01718 |
| 0.4793  | 0.24138 | 0.07576 | 0.05263 | 0.08224 | 0.16698 | 0.14248 | 0.12741 | 0.15076 |
| 0.00318 | 0.03448 | 0       | 0.00509 | 0.01316 | 0.00188 | 0.05277 | 0.02317 | 0.0229  |
| 0.00637 | 0.0431  | 0.60606 | 0.04924 | 0.09211 | 0.31707 | 0.13456 | 0.00579 | 0.06107 |
| 0.12261 | 0.02586 | 0.68182 | 0.08149 | 0.04934 | 0.05816 | 0.18997 | 0.14286 | 0.02099 |
| 0.0207  | 0.16379 | 0.09091 | 0.0017  | 0.01645 | 0.01876 | 0.01055 | 0.05019 | 0.14122 |
| 0.01274 | 0.09483 | 0       | 0.00849 | 0.01316 | 0.00563 | 0.09763 | 0.11969 | 0.07443 |
| 0.00318 | 0       | 0.57576 | 0.01019 | 0.00329 | 0.00375 | 0       | 0.00772 | 0.00763 |
| 0       | 0.0431  | 0.33333 | 0.01528 | 0.01645 | 0.0075  | 0.01055 | 0.00193 | 0.02672 |
| 0.07643 | 0.01724 | 0.06061 | 0.05433 | 0.07895 | 0.02251 | 0.09763 | 0.0444  | 0.05916 |
| 0.02229 | 0.03448 | 0.01515 | 0       | 0.00329 | 0       | 0.14512 | 0.01351 | 0.06107 |
| 0.00478 | 0.03448 | 0       | 0       | 0       | 0       | 0.01055 | 0.02896 | 0.01718 |

| MESO    | OV      | PAAD    | PCPG    | PRAD    | READ    | SARC    | SKCM    | STAD    |
|---------|---------|---------|---------|---------|---------|---------|---------|---------|
| 0.17442 | 0.16852 | 0.02013 | 0.07333 | 0.01014 | 0.21687 | 0.03333 | 0.12076 | 0.04299 |
| 0.04651 | 0.27027 | 0       | 0.00667 | 0.00609 | 0.08434 | 0.14167 | 0.02331 | 0.02036 |
| 0.01163 | 0.17647 | 0       | 0.00667 | 0.01014 | 0.03614 | 0.05833 | 0.02754 | 0.02489 |
| 0.03488 | 0.11288 | 0       | 0.02    | 0.01014 | 0       | 0.24167 | 0.0678  | 0.00905 |
| 0.12791 | 0.39905 | 0.02013 | 0.02667 | 0.24138 | 0.01205 | 0.43333 | 0.06568 | 0.01131 |
| 0.01163 | 0.1876  | 0       | 0.02    | 0.00203 | 0       | 0.09167 | 0.02754 | 0.02715 |
| 0.02326 | 0.062   | 0.01342 | 0.01333 | 0.00406 | 0.01205 | 0.075   | 0.07415 | 0.02262 |
| 0.12791 | 0.46582 | 0.01342 | 0       | 0.01014 | 0.13253 | 0.1     | 0.06992 | 0.04072 |
| 0.02326 | 0.23688 | 0.04698 | 0.10667 | 0.18053 | 0.19277 | 0.10833 | 0.11864 | 0.07014 |
| 0.04651 | 0.00795 | 0.01342 | 0.46667 | 0.01826 | 0       | 0.05    | 0.05508 | 0       |
| 0       | 0.03975 | 0       | 0.15333 | 0       | 0.03614 | 0.04167 | 0.11441 | 0.01584 |
| 0       | 0.00318 | 0       | 0.02667 | 0.01014 | 0       | 0       | 0       | 0.00226 |
| 0.11628 | 0.47695 | 0.01342 | 0       | 0.01014 | 0.13253 | 0.09167 | 0.0678  | 0.03846 |
| 0       | 0.03657 | 0.00671 | 0.05333 | 0.00811 | 0       | 0.04167 | 0.01907 | 0       |
| 0.19767 | 0.08267 | 0.05369 | 0.66667 | 0.0284  | 0.13253 | 0.125   | 0.07415 | 0.03394 |
| 0       | 0.2814  | 0.02013 | 0.03333 | 0.00203 | 0.01205 | 0.08333 | 0.03178 | 0.05204 |
| 0.15116 | 0.17647 | 0.06711 | 0.52    | 0.02434 | 0.19277 | 0.08333 | 0.0911  | 0.03394 |
| 0.13953 | 0.24801 | 0.00671 | 0.06667 | 0.01014 | 0.18072 | 0.05    | 0.11653 | 0.02262 |
| 0       | 0.03816 | 0       | 0.01333 | 0.00406 | 0.03614 | 0.01667 | 0.0572  | 0.00905 |
| 0.04651 | 0.07154 | 0.04698 | 0.63333 | 0.03651 | 0.09639 | 0.05833 | 0.0339  | 0.01131 |
| 0.01163 | 0.16216 | 0.01342 | 0.03333 | 0.01014 | 0.0241  | 0.01667 | 0.06992 | 0.02941 |
| 0.01163 | 0.00318 | 0       | 0.04    | 0       | 0       | 0.00833 | 0       | 0       |
| 0.02326 | 0.06995 | 0.02013 | 0.04    | 0.00406 | 0       | 0.05    | 0.05932 | 0.01584 |
| 0.01163 | 0.04452 | 0.02685 | 0.06667 | 0.03043 | 0.01205 | 0.175   | 0.02119 | 0.05204 |
| 0.04651 | 0.09221 | 0.00671 | 0.01333 | 0.01014 | 0       | 0.11667 | 0.03602 | 0.00679 |
| 0.01163 | 0.04134 | 0.01342 | 0.06    | 0.02231 | 0       | 0.175   | 0.02119 | 0.05204 |
| 0.11628 | 0.26232 | 0.12081 | 0.02667 | 0.01217 | 0.09639 | 0.2     | 0.36864 | 0.11312 |
| 0.01163 | 0.2194  | 0.06711 | 0.04    | 0.01826 | 0.03614 | 0.05833 | 0.02542 | 0.00679 |
| 0.03488 | 0.15421 | 0.0604  | 0.04    | 0.0142  | 0.04819 | 0.03333 | 0.02966 | 0.02036 |
| 0.11628 | 0.2655  | 0.12081 | 0.02667 | 0.02028 | 0.07229 | 0.21667 | 0.37076 | 0.11312 |
| 0       | 0.0461  | 0.01342 | 0       | 0.00609 | 0.0241  | 0       | 0.01059 | 0.01357 |
| 0.06977 | 0.04134 | 0.04698 | 0.52667 | 0.00406 | 0.10843 | 0.09167 | 0.04025 | 0.01584 |
| 0.16279 | 0.27345 | 0.12752 | 0.13333 | 0.21907 | 0.07229 | 0.125   | 0.27754 | 0.0543  |
| 0.02326 | 0.3911  | 0.02685 | 0.02667 | 0.1217  | 0.13253 | 0.03333 | 0.09746 | 0.08597 |
| 0.04651 | 0.58506 | 0.01342 | 0       | 0.00811 | 0.07229 | 0.11667 | 0.06568 | 0.07466 |
| 0.01163 | 0.21145 | 0.0604  | 0.04    | 0.00811 | 0.0241  | 0.03333 | 0.01907 | 0.00905 |
| 0       | 0.05087 | 0       | 0.01333 | 0.00811 | 0       | 0.08333 | 0.03178 | 0.01357 |
| 0.0814  | 0.33545 | 0.02685 | 0.03333 | 0.00406 | 0.04819 | 0.125   | 0.2161  | 0.01357 |
| 0.01163 | 0.28458 | 0.02013 | 0.03333 | 0.00203 | 0.01205 | 0.09167 | 0.03178 | 0.04977 |
| 0       | 0.03021 | 0       | 0.01333 | 0.01217 | 0       | 0.03333 | 0.00636 | 0       |

| TGCT    | THCA    | THYM    | UCEC    | UCS     | UVM     |        |
|---------|---------|---------|---------|---------|---------|--------|
| 0       | 0.00196 |         | 0       | 0.03461 | 0.14286 | 0.05   |
| 0.01282 | 0       |         | 0       | 0.04007 | 0.17857 | 0.0125 |
| 0.01282 | 0       |         | 0       | 0.03279 | 0.07143 | 0.0125 |
| 0.00641 | 0.00587 |         | 0       | 0.02004 | 0.01786 | 0.05   |
| 0.04487 | 0.03718 | 0.03333 | 0.09654 | 0.25    | 0.0375  |        |
| 0.00641 | 0.00196 |         | 0       | 0.04736 | 0.125   | 0      |
| 0       | 0       |         | 0       | 0.00546 | 0.08929 | 0.05   |
| 0.0641  | 0       |         | 0       | 0.07286 | 0.375   | 0.0625 |
| 0.00641 | 0       |         | 0       | 0.08561 | 0.25    | 0.225  |
| 0       | 0.00587 |         | 0       | 0.00546 | 0.03571 | 0.5125 |
| 0.08974 | 0.00978 |         | 0       | 0.03279 | 0.19643 | 0.0125 |
| 0       | 0       |         | 0       | 0       | 0       | 0      |
| 0.0641  | 0       |         | 0       | 0.06922 | 0.375   | 0.0625 |
| 0       | 0.00196 |         | 0       | 0.02004 | 0.01786 | 0      |
| 0.01923 | 0.00391 |         | 0       | 0.02186 | 0.01786 | 0.2875 |
| 0.00641 | 0.00196 |         | 0       | 0.07104 | 0.16071 | 0      |
| 0.00641 | 0.00391 | 0.03333 | 0.04918 | 0.14286 | 0.3125  |        |
| 0.00641 | 0       | 0.03333 | 0.05829 | 0.19643 | 0.025   |        |
| 0.02564 | 0       |         | 0       | 0.01821 | 0.01786 | 0.0125 |
| 0.00641 | 0.00391 |         | 0       | 0.00911 | 0.03571 | 0.2875 |
| 0       | 0       |         | 0       | 0.03097 | 0.10714 | 0      |
| 0       | 0       |         | 0       | 0       | 0       | 0      |
| 0       | 0       |         | 0       | 0.00546 | 0.16071 | 0.05   |
| 0.00641 | 0       |         | 0       | 0.04736 | 0.125   | 0.0125 |
| 0       | 0.00587 |         | 0       | 0.02004 | 0       | 0.0125 |
| 0.00641 | 0       |         | 0       | 0.04918 | 0.10714 | 0.0125 |
| 0.03205 | 0.0137  | 0.1     | 0.06011 | 0.26786 | 0.0375  |        |
| 0       | 0       |         | 0       | 0.05829 | 0.03571 | 0      |
| 0       | 0.00587 | 0.03333 | 0.04554 | 0.05357 | 0       |        |
| 0.03205 | 0.0137  | 0.1     | 0.06011 | 0.26786 | 0.0375  |        |
| 0       | 0.00196 |         | 0       | 0.01093 | 0.01786 | 0      |
| 0.00641 | 0.00391 |         | 0       | 0.00911 | 0.01786 | 0.3375 |
| 0.00641 | 0.00587 | 0.03333 | 0.01275 | 0.05357 | 0.325   |        |
| 0.03846 | 0       |         | 0       | 0.10747 | 0.32143 | 0.05   |
| 0.01282 | 0.01566 | 0.03333 | 0.18761 | 0.60714 | 0.025   |        |
| 0       | 0       |         | 0       | 0.06011 | 0.03571 | 0      |
| 0       | 0.00391 |         | 0       | 0.00729 | 0       | 0.0125 |
| 0.00641 | 0.03914 | 0.03333 | 0.12022 | 0.41071 | 0.0375  |        |
| 0.00641 | 0.00196 |         | 0       | 0.07286 | 0.21429 | 0      |
| 0       | 0       |         | 0       | 0.01093 | 0.03571 | 0      |

**Table S2: CNV amplification frequency of mTOR pathway genes across 33 cancer types**

|          | ACC      | BLCA     | BRCA     | CESC     | CHOL     | COAD     | DLBC     | ESCA     |
|----------|----------|----------|----------|----------|----------|----------|----------|----------|
| AKT1     | 0.166667 | 0.050725 | 0.062793 | 0.110204 | 0        | 0.012024 | 0.034483 | 0.135417 |
| AKT1S1   | 0.455556 | 0.142512 | 0.061856 | 0.155102 | 0.060606 | 0.066132 | 0.034483 | 0.052083 |
| AKT2     | 0.433333 | 0.18599  | 0.075914 | 0.183673 | 0.090909 | 0.076152 | 0        | 0.03125  |
| CAB39    | 0.066667 | 0        | 0.009372 | 0.008163 | 0.090909 | 0.026052 | 0        | 0        |
| CAB39L   | 0.044444 | 0.048309 | 0.015933 | 0.008163 | 0        | 0.442886 | 0.034483 | 0.020833 |
| EEF2K    | 0.411111 | 0.036232 | 0.292409 | 0.061224 | 0.060606 | 0.09018  | 0.034483 | 0.03125  |
| EIF4B    | 0.611111 | 0.041063 | 0.044986 | 0.040816 | 0.090909 | 0.094188 | 0.034483 | 0.020833 |
| EIF4E    | 0.266667 | 0.016908 | 0.033739 | 0.028571 | 0        | 0.008016 | 0        | 0.03125  |
| EIF4EBP1 | 0.288889 | 0.166667 | 0.276476 | 0.061224 | 0.030303 | 0.196393 | 0.034483 | 0.25     |
| EIF4G1   | 0.111111 | 0.219807 | 0.143393 | 0.677551 | 0.090909 | 0.072144 | 0.137931 | 0.708333 |
| LAMTOR1  | 0.044444 | 0.128019 | 0.109653 | 0.069388 | 0        | 0.018036 | 0.034483 | 0.354167 |
| LAMTOR2  | 0.077778 | 0.246377 | 0.56045  | 0.326531 | 0.484848 | 0.104208 | 0.206897 | 0.197917 |
| LAMTOR3  | 0.266667 | 0.016908 | 0.032802 | 0.028571 | 0        | 0.006012 | 0        | 0.03125  |
| LAMTOR4  | 0.355556 | 0.086957 | 0.088097 | 0.081633 | 0.060606 | 0.306613 | 0.137931 | 0.229167 |
| LAMTOR5  | 0.011111 | 0.031401 | 0.039363 | 0.089796 | 0.151515 | 0.002004 | 0        | 0.020833 |
| MLST8    | 0.4      | 0.012077 | 0.302718 | 0.130612 | 0.060606 | 0.082164 | 0.068966 | 0.020833 |
| MTOR     | 0.011111 | 0.057971 | 0.012184 | 0.114286 | 0        | 0.006012 | 0        | 0.020833 |
| PPM1A    | 0.133333 | 0.038647 | 0.041237 | 0.102041 | 0.030303 | 0.014028 | 0.068966 | 0.125    |
| PRKAA1   | 0.577778 | 0.280193 | 0.132146 | 0.35102  | 0.121212 | 0.096192 | 0.068966 | 0.4375   |
| PRKAA2   | 0.011111 | 0.060386 | 0.044049 | 0.146939 | 0.151515 | 0.002004 | 0        | 0        |
| PRKAB1   | 0.577778 | 0.055556 | 0.043112 | 0.040816 | 0.060606 | 0.084168 | 0.034483 | 0.0625   |
| PRKAB2   | 0.1      | 0.268116 | 0.448922 | 0.269388 | 0.424242 | 0.104208 | 0.137931 | 0.197917 |
| PRKAG1   | 0.6      | 0.031401 | 0.04686  | 0.044898 | 0.090909 | 0.098196 | 0.034483 | 0.03125  |
| PRKAG2   | 0.4      | 0.082126 | 0.079663 | 0.04898  | 0.030303 | 0.270541 | 0.034483 | 0.083333 |
| PRKAG3   | 0.077778 | 0        | 0.018744 | 0.012245 | 0.060606 | 0.028056 | 0        | 0        |
| RHEB     | 0.4      | 0.074879 | 0.079663 | 0.04898  | 0.030303 | 0.272545 | 0.034483 | 0.083333 |
| RPS6     | 0.122222 | 0.070048 | 0.067479 | 0.102041 | 0        | 0.094188 | 0.103448 | 0.041667 |
| RPS6KB1  | 0.066667 | 0.161836 | 0.266167 | 0.097959 | 0.151515 | 0.088176 | 0.034483 | 0.104167 |
| RPTOR    | 0.066667 | 0.15942  | 0.223055 | 0.089796 | 0.121212 | 0.104208 | 0.034483 | 0.104167 |
| RRAGA    | 0.133333 | 0.067633 | 0.066542 | 0.102041 | 0        | 0.094188 | 0.103448 | 0.041667 |
| RRAGB    | 0.044444 | 0.045894 | 0.056232 | 0.036735 | 0.060606 | 0.018036 | 0.034483 | 0.041667 |
| RRAGC    | 0        | 0.055556 | 0.053421 | 0.134694 | 0.090909 | 0.006012 | 0        | 0.072917 |
| RRAGD    | 0.111111 | 0.002415 | 0.056232 | 0.032653 | 0.030303 | 0.018036 | 0        | 0.052083 |
| SLC38A9  | 0.566667 | 0.031401 | 0.044986 | 0.04898  | 0.060606 | 0.02004  | 0.068966 | 0.020833 |
| STK11    | 0.444444 | 0.021739 | 0.014058 | 0.028571 | 0.030303 | 0.028056 | 0.068966 | 0.03125  |
| STRADA   | 0.1      | 0.181159 | 0.247423 | 0.114286 | 0.151515 | 0.102204 | 0.034483 | 0.09375  |
| STRADB   | 0.044444 | 0.014493 | 0.028116 | 0.040816 | 0.060606 | 0.028056 | 0        | 0.083333 |
| TSC1     | 0.244444 | 0.043478 | 0.04686  | 0.15102  | 0.030303 | 0.0501   | 0.068966 | 0.197917 |
| TSC2     | 0.388889 | 0.014493 | 0.30553  | 0.122449 | 0.060606 | 0.08016  | 0.068966 | 0.020833 |
| YWHAB    | 0.444444 | 0.258454 | 0.204311 | 0.22449  | 0.090909 | 0.659319 | 0        | 0.239583 |

| GBM      | HNSC     | KICH     | KIRC     | KIRP     | LGG      | LIHC     | LUAD     | LUSC     |
|----------|----------|----------|----------|----------|----------|----------|----------|----------|
| 0.030255 | 0.146552 | 0.454545 | 0.013582 | 0.009868 | 0.009381 | 0.015831 | 0.079151 | 0.104962 |
| 0.173567 | 0.043103 | 0.318182 | 0.027165 | 0.013158 | 0.026266 | 0.068602 | 0.023166 | 0.074427 |
| 0.203822 | 0.051724 | 0.30303  | 0.028862 | 0.013158 | 0.035647 | 0.073879 | 0.094595 | 0.187023 |
| 0.012739 | 0.008621 | 0.015152 | 0.035654 | 0.046053 | 0.005629 | 0.026385 | 0.032819 | 0.009542 |
| 0.001592 | 0.025862 | 0.045455 | 0.013582 | 0.065789 | 0.005629 | 0        | 0.021236 | 0.007634 |
| 0.009554 | 0.043103 | 0.333333 | 0.059423 | 0.411184 | 0.005629 | 0.039578 | 0.069498 | 0.022901 |
| 0.046178 | 0.008621 | 0.469697 | 0.04584  | 0.282895 | 0.005629 | 0.026385 | 0.090734 | 0.049618 |
| 0.017516 | 0        | 0.424242 | 0.001698 | 0.013158 | 0.005629 | 0.013193 | 0.003861 | 0.01145  |
| 0.022293 | 0.189655 | 0.227273 | 0.011885 | 0.0625   | 0.033771 | 0.063325 | 0.102317 | 0.244275 |
| 0.084395 | 0.663793 | 0.333333 | 0.054329 | 0.220395 | 0.026266 | 0.073879 | 0.119691 | 0.765267 |
| 0.012739 | 0.137931 | 0.424242 | 0.008489 | 0.029605 | 0.046904 | 0.029024 | 0.094595 | 0.093511 |
| 0.08758  | 0.12069  | 0        | 0.056027 | 0.036184 | 0.045028 | 0.60686  | 0.413127 | 0.230916 |
| 0.019108 | 0        | 0.439394 | 0.001698 | 0.016447 | 0.005629 | 0.007916 | 0.003861 | 0.015267 |
| 0.699045 | 0.215517 | 0.333333 | 0.149406 | 0.480263 | 0.236398 | 0.171504 | 0.144788 | 0.187023 |
| 0.050955 | 0        | 0        | 0.003396 | 0.006579 | 0.015009 | 0.050132 | 0.019305 | 0.01145  |
| 0.020701 | 0.025862 | 0.454545 | 0.057725 | 0.384868 | 0.013133 | 0.036939 | 0.07722  | 0.020992 |
| 0.049363 | 0.025862 | 0        | 0.001698 | 0.003289 | 0.013133 | 0.029024 | 0.03861  | 0.017176 |
| 0.006369 | 0.077586 | 0.424242 | 0.006791 | 0        | 0.005629 | 0.015831 | 0.071429 | 0.053435 |
| 0.036624 | 0.206897 | 0.257576 | 0.140917 | 0.069079 | 0.015009 | 0.174142 | 0.372587 | 0.486641 |
| 0.05414  | 0.025862 | 0        | 0.003396 | 0.006579 | 0.016886 | 0.050132 | 0.03668  | 0.028626 |
| 0.035032 | 0.025862 | 0.318182 | 0.04584  | 0.292763 | 0.020638 | 0.044855 | 0.046332 | 0.028626 |
| 0.070064 | 0.094828 | 0.015152 | 0.050934 | 0.019737 | 0.0394   | 0.448549 | 0.351351 | 0.208015 |
| 0.046178 | 0        | 0.454545 | 0.04584  | 0.282895 | 0.005629 | 0.034301 | 0.083012 | 0.03626  |
| 0.716561 | 0.094828 | 0.484848 | 0.16129  | 0.542763 | 0.260788 | 0.187335 | 0.158301 | 0.114504 |
| 0.015924 | 0        | 0.015152 | 0.035654 | 0.042763 | 0.007505 | 0.029024 | 0.019305 | 0.01145  |
| 0.711783 | 0.094828 | 0.515152 | 0.157895 | 0.542763 | 0.260788 | 0.17942  | 0.15251  | 0.116412 |
| 0.012739 | 0.094828 | 0.242424 | 0.013582 | 0.019737 | 0.013133 | 0.023747 | 0.028958 | 0.040076 |
| 0.035032 | 0.051724 | 0        | 0.027165 | 0.526316 | 0.045028 | 0.21372  | 0.167954 | 0.135496 |
| 0.042994 | 0.068966 | 0.030303 | 0.027165 | 0.526316 | 0.041276 | 0.240106 | 0.175676 | 0.158397 |
| 0.014331 | 0.086207 | 0.227273 | 0.01528  | 0.013158 | 0.013133 | 0.029024 | 0.025097 | 0.040076 |
| 0.014331 | 0.051724 | 0        | 0.011885 | 0.013158 | 0.050657 | 0.013193 | 0.034749 | 0.032443 |
| 0.052548 | 0.034483 | 0        | 0.005093 | 0.006579 | 0.015009 | 0.029024 | 0.052124 | 0.030534 |
| 0.011146 | 0.025862 | 0.030303 | 0.001698 | 0.009868 | 0        | 0.036939 | 0.005792 | 0.055344 |
| 0.022293 | 0        | 0.363636 | 0.123939 | 0.065789 | 0.009381 | 0.113456 | 0.100386 | 0.017176 |
| 0.283439 | 0.008621 | 0.318182 | 0.011885 | 0.009868 | 0.061914 | 0.023747 | 0.015444 | 0.026718 |
| 0.031847 | 0.068966 | 0        | 0.028862 | 0.532895 | 0.045028 | 0.200528 | 0.146718 | 0.152672 |
| 0.012739 | 0.051724 | 0.030303 | 0.047538 | 0.049342 | 0.005629 | 0.042216 | 0.034749 | 0.053435 |
| 0.065287 | 0.12069  | 0.257576 | 0.013582 | 0.003289 | 0.033771 | 0.031662 | 0.013514 | 0.053435 |
| 0.020701 | 0.025862 | 0.454545 | 0.057725 | 0.388158 | 0.013133 | 0.044855 | 0.07722  | 0.026718 |
| 0.292994 | 0.051724 | 0.424242 | 0.056027 | 0.276316 | 0.045028 | 0.137203 | 0.111969 | 0.160305 |

| MESO     | OV       | PAAD     | PCPG     | PRAD     | READ     | SARC     | SKCM     | STAD     |
|----------|----------|----------|----------|----------|----------|----------|----------|----------|
| 0.011628 | 0.17806  | 0.020134 | 0.006667 | 0.016227 | 0.012048 | 0.2      | 0.033898 | 0.011312 |
| 0.011628 | 0.058824 | 0.040268 | 0.033333 | 0.006085 | 0.096386 | 0.133333 | 0.040254 | 0.074661 |
| 0.046512 | 0.222576 | 0.127517 | 0.033333 | 0.006085 | 0.120482 | 0.291667 | 0.040254 | 0.063348 |
| 0.011628 | 0.144674 | 0.040268 | 0.006667 | 0.006085 | 0.012048 | 0.025    | 0.012712 | 0.013575 |
| 0        | 0.057234 | 0.04698  | 0.04     | 0        | 0.650602 | 0        | 0.091102 | 0.128959 |
| 0.069767 | 0.065183 | 0        | 0.013333 | 0.018256 | 0.108434 | 0.091667 | 0.038136 | 0.040724 |
| 0.023256 | 0.192369 | 0        | 0.04     | 0.010142 | 0.072289 | 0.025    | 0.014831 | 0.040724 |
| 0        | 0.015898 | 0        | 0.02     | 0.004057 | 0.012048 | 0.125    | 0.029661 | 0.006787 |
| 0.093023 | 0.147854 | 0.033557 | 0.033333 | 0.073022 | 0.108434 | 0.208333 | 0.108051 | 0.128959 |
| 0.046512 | 0.6407   | 0.026846 | 0        | 0.032454 | 0.096386 | 0.116667 | 0.048729 | 0.156109 |
| 0.05814  | 0.259141 | 0.033557 | 0.02     | 0.026369 | 0.036145 | 0.125    | 0.076271 | 0.090498 |
| 0.139535 | 0.486486 | 0.187919 | 0.133333 | 0.024341 | 0.204819 | 0.308333 | 0.326271 | 0.135747 |
| 0        | 0.017488 | 0        | 0.02     | 0.004057 | 0.012048 | 0.116667 | 0.033898 | 0.004525 |
| 0.116279 | 0.306836 | 0.067114 | 0.046667 | 0.068966 | 0.337349 | 0.166667 | 0.307203 | 0.167421 |
| 0.023256 | 0.162162 | 0        | 0        | 0.004057 | 0        | 0.091667 | 0.084746 | 0.013575 |
| 0.081395 | 0.082671 | 0.006711 | 0.013333 | 0.032454 | 0.108434 | 0.1      | 0.052966 | 0.031674 |
| 0.011628 | 0.138315 | 0.020134 | 0        | 0.002028 | 0        | 0.225    | 0.059322 | 0.056561 |
| 0.011628 | 0.049285 | 0.020134 | 0.02     | 0.006085 | 0.012048 | 0.175    | 0.033898 | 0.022624 |
| 0.197674 | 0.27345  | 0.026846 | 0.06     | 0.026369 | 0.168675 | 0.333333 | 0.122881 | 0.178733 |
| 0.023256 | 0.230525 | 0        | 0        | 0.002028 | 0.024096 | 0.266667 | 0.067797 | 0.00905  |
| 0.034884 | 0.152623 | 0        | 0.046667 | 0.018256 | 0.060241 | 0.091667 | 0.012712 | 0.022624 |
| 0.139535 | 0.437202 | 0.167785 | 0.146667 | 0.032454 | 0.204819 | 0.3      | 0.286017 | 0.115385 |
| 0.023256 | 0.158983 | 0        | 0.02     | 0.002028 | 0.072289 | 0.05     | 0.038136 | 0.027149 |
| 0.081395 | 0.424483 | 0.020134 | 0.053333 | 0.056795 | 0.337349 | 0.125    | 0.389831 | 0.079186 |
| 0.011628 | 0.158983 | 0.033557 | 0.013333 | 0.006085 | 0.048193 | 0.016667 | 0.021186 | 0.027149 |
| 0.069767 | 0.424483 | 0.020134 | 0.053333 | 0.054767 | 0.337349 | 0.125    | 0.389831 | 0.076923 |
| 0        | 0.162162 | 0.006711 | 0.006667 | 0.01217  | 0.108434 | 0.141667 | 0.016949 | 0.040724 |
| 0.139535 | 0.139905 | 0.026846 | 0.04     | 0.008114 | 0.120482 | 0.108333 | 0.135593 | 0.067873 |
| 0.104651 | 0.230525 | 0.020134 | 0.04     | 0.01217  | 0.072289 | 0.125    | 0.146186 | 0.065611 |
| 0        | 0.158983 | 0.006711 | 0.006667 | 0.010142 | 0.108434 | 0.125    | 0.010593 | 0.033937 |
| 0        | 0.138315 | 0        | 0.013333 | 0        | 0.036145 | 0.308333 | 0.025424 | 0.020362 |
| 0.034884 | 0.329094 | 0.006711 | 0.013333 | 0        | 0        | 0.191667 | 0.074153 | 0.033937 |
| 0        | 0.130366 | 0        | 0.013333 | 0        | 0.072289 | 0.05     | 0.023305 | 0.022624 |
| 0.069767 | 0.046105 | 0        | 0.026667 | 0.008114 | 0.048193 | 0.141667 | 0.048729 | 0.015837 |
| 0.069767 | 0.011129 | 0        | 0.073333 | 0.004057 | 0.048193 | 0.133333 | 0.03178  | 0.011312 |
| 0.139535 | 0.139905 | 0.04698  | 0.04     | 0.014199 | 0.120482 | 0.133333 | 0.148305 | 0.076923 |
| 0.011628 | 0.201908 | 0.040268 | 0.006667 | 0.004057 | 0.072289 | 0.05     | 0.025424 | 0.038462 |
| 0.011628 | 0.054054 | 0        | 0        | 0.046653 | 0.036145 | 0.05     | 0.019068 | 0.065611 |
| 0.081395 | 0.081081 | 0.013423 | 0.013333 | 0.032454 | 0.13253  | 0.1      | 0.050847 | 0.029412 |
| 0.034884 | 0.45787  | 0.053691 | 0.02     | 0.020284 | 0.879518 | 0.325    | 0.258475 | 0.375566 |



| TGCT     | THCA     | THYM     | UCEC     | UCS      | UVM      |        |
|----------|----------|----------|----------|----------|----------|--------|
| 0.089744 | 0.005871 |          | 0        | 0.065574 | 0.089286 | 0.0375 |
| 0        | 0.003914 |          | 0        | 0.047359 | 0.142857 | 0      |
| 0        | 0.003914 |          | 0        | 0.087432 | 0.357143 | 0      |
| 0.012821 | 0.001957 |          | 0        | 0.052823 | 0.160714 | 0.025  |
| 0.00641  | 0        |          | 0        | 0.023679 | 0.089286 | 0.0375 |
| 0.019231 | 0.009785 |          | 0        | 0.029144 | 0.071429 | 0.0125 |
| 0.160256 | 0.009785 |          | 0        | 0.07286  | 0.196429 | 0      |
| 0        | 0.001957 |          | 0        | 0.010929 | 0        | 0.05   |
| 0.314103 | 0        |          | 0        | 0.153005 | 0.357143 | 0.2    |
| 0.121795 | 0.001957 |          | 0        | 0.220401 | 0.464286 | 0      |
| 0        | 0        |          | 0        | 0.038251 | 0.107143 | 0.0875 |
| 0.147436 | 0.054795 | 0.066667 | 0.415301 | 0.571429 | 0.0875   |        |
| 0        | 0.001957 |          | 0        | 0.01275  | 0        | 0.05   |
| 0.307692 | 0.035225 | 0.033333 | 0.116576 | 0.267857 | 0.075    |        |
| 0.089744 | 0        |          | 0        | 0.023679 | 0.107143 | 0      |
| 0.00641  | 0.013699 |          | 0        | 0.040073 | 0.125    | 0.0125 |
| 0.064103 | 0        |          | 0        | 0.056466 | 0.071429 | 0      |
| 0.096154 | 0.001957 |          | 0        | 0.029144 | 0.035714 | 0.0625 |
| 0        | 0.027397 | 0.033333 | 0.092896 | 0.321429 | 0        |        |
| 0.076923 | 0        |          | 0        | 0.029144 | 0.160714 | 0      |
| 0.083333 | 0.009785 |          | 0        | 0.034608 | 0.107143 | 0.025  |
| 0.121795 | 0.052838 | 0.066667 | 0.313297 | 0.446429 | 0.0625   |        |
| 0.153846 | 0.009785 |          | 0        | 0.03643  | 0.107143 | 0      |
| 0.24359  | 0.035225 | 0.033333 | 0.091075 | 0.196429 | 0.075    |        |
| 0.044872 | 0.001957 |          | 0        | 0.061931 | 0.214286 | 0.05   |
| 0.24359  | 0.035225 | 0.033333 | 0.096539 | 0.214286 | 0.075    |        |
| 0.019231 | 0        |          | 0        | 0.052823 | 0.017857 | 0.0625 |
| 0.051282 | 0.007828 | 0.066667 | 0.071038 | 0.357143 | 0.1875   |        |
| 0.057692 | 0.007828 | 0.033333 | 0.08561  | 0.410714 | 0.1625   |        |
| 0.019231 | 0        |          | 0        | 0.051002 | 0.035714 | 0.0625 |
| 0.019231 | 0        |          | 0        | 0.038251 | 0.321429 | 0.025  |
| 0.044872 | 0        |          | 0        | 0.051002 | 0.196429 | 0      |
| 0.019231 | 0        |          | 0        | 0.038251 | 0.214286 | 0.05   |
| 0        | 0.013699 |          | 0        | 0.014572 | 0.035714 | 0      |
| 0.00641  | 0        |          | 0        | 0.01275  | 0        | 0      |
| 0.051282 | 0.007828 | 0.066667 | 0.063752 | 0.321429 | 0.1875   |        |
| 0.038462 | 0.001957 |          | 0        | 0.051002 | 0.160714 | 0.05   |
| 0.012821 | 0.003914 |          | 0        | 0.010929 | 0.017857 | 0.05   |
| 0.00641  | 0.013699 |          | 0        | 0.038251 | 0.089286 | 0.0125 |
| 0.025641 | 0.005871 | 0.033333 | 0.136612 | 0.5      | 0.0875   |        |

**Table S3: SNV frequency of mTOR pathway genes in 33 cancer types**

|          | ACC     | BLCA    | BRCA    | CESC    | CHOL    | COAD    | DLBC    | ESCA    |
|----------|---------|---------|---------|---------|---------|---------|---------|---------|
| AKT1     | 0       | 0.01942 | 0.0284  | 0.02768 | 0       | 0.03509 | 0       | 0.00543 |
| AKT1S1   | 0       | 0.00728 | 0.00101 | 0.01038 | 0       | 0.01253 | 0.02703 | 0.0163  |
| AKT2     | 0       | 0.00971 | 0.00609 | 0.02422 | 0       | 0.02256 | 0.02703 | 0.0163  |
| CAB39    | 0       | 0.00728 | 0.00101 | 0.00692 | 0       | 0.00501 | 0       | 0.01087 |
| CAB39L   | 0       | 0.00971 | 0.00304 | 0.01038 | 0       | 0.03759 | 0       | 0.00543 |
| EEF2K    | 0       | 0.02184 | 0.0071  | 0.02076 | 0.03922 | 0.03759 | 0.02703 | 0.00543 |
| EIF4B    | 0       | 0.01456 | 0.00304 | 0.02076 | 0       | 0.03008 | 0       | 0.0163  |
| EIF4E    | 0.01087 | 0.00485 | 0.00203 | 0.0173  | 0       | 0.01754 | 0       | 0.01087 |
| EIF4EBP1 | 0       | 0.00243 | 0       | 0       | 0       | 0       | 0       | 0       |
| EIF4G1   | 0.02174 | 0.04126 | 0.00913 | 0.0346  | 0.01961 | 0.06266 | 0       | 0.01087 |
| LAMTOR1  | 0       | 0       | 0       | 0.00346 | 0       | 0.01253 | 0.02703 | 0.00543 |
| LAMTOR2  | 0       | 0.00485 | 0.00101 | 0.00346 | 0       | 0.00752 | 0       | 0       |
| LAMTOR3  | 0       | 0.00243 | 0       | 0.00346 | 0       | 0.01003 | 0       | 0       |
| LAMTOR4  | 0       | 0       | 0       | 0.01384 | 0       | 0.00251 | 0       | 0       |
| LAMTOR5  | 0       | 0.01942 | 0       | 0       | 0       | 0.00251 | 0       | 0.00543 |
| MLST8    | 0       | 0.01699 | 0       | 0.01038 | 0       | 0.01504 | 0       | 0.00543 |
| MTOR     | 0       | 0.04369 | 0.02231 | 0.05536 | 0       | 0.10276 | 0       | 0.02717 |
| PPM1A    | 0       | 0.01456 | 0.00203 | 0.01038 | 0.01961 | 0.02506 | 0       | 0.00543 |
| PRKAA1   | 0       | 0.01456 | 0.01014 | 0.01038 | 0       | 0.02757 | 0       | 0.0163  |
| PRKAA2   | 0       | 0.01699 | 0.00304 | 0.01038 | 0.01961 | 0.03509 | 0       | 0.00543 |
| PRKAB1   | 0       | 0.01214 | 0.00304 | 0.00346 | 0       | 0.02005 | 0.02703 | 0.00543 |
| PRKAB2   | 0       | 0       | 0.00304 | 0.00692 | 0.01961 | 0.01253 | 0       | 0.00543 |
| PRKAG1   | 0.02174 | 0.01214 | 0.00304 | 0.0173  | 0.01961 | 0.03008 | 0       | 0.00543 |
| PRKAG2   | 0.03261 | 0.00485 | 0.0071  | 0.01038 | 0       | 0.03008 | 0       | 0.01087 |
| PRKAG3   | 0.01087 | 0.00485 | 0.00406 | 0.00692 | 0.01961 | 0.02256 | 0       | 0.00543 |
| RHEB     | 0       | 0.00243 | 0.00101 | 0       | 0       | 0.00752 | 0       | 0       |
| RPS6     | 0       | 0.03641 | 0.00913 | 0.01384 | 0       | 0.00501 | 0       | 0       |
| RPS6KB1  | 0       | 0.00485 | 0.0071  | 0.01384 | 0       | 0.02256 | 0       | 0.0163  |
| RPTOR    | 0.01087 | 0.0267  | 0.0142  | 0.04152 | 0       | 0.05764 | 0       | 0.0163  |
| RRAGA    | 0       | 0.01214 | 0       | 0       | 0       | 0.01003 | 0       | 0       |
| RRAGB    | 0.01087 | 0.00971 | 0.00101 | 0.0173  | 0       | 0.01754 | 0       | 0.0163  |
| RRAGC    | 0       | 0       | 0.00101 | 0.00692 | 0       | 0.01504 | 0       | 0       |
| RRAGD    | 0       | 0.00243 | 0.00507 | 0       | 0       | 0.01253 | 0       | 0.01087 |
| SLC38A9  | 0.01087 | 0.01456 | 0.00913 | 0.01038 | 0       | 0.03759 | 0       | 0.01087 |
| STK11    | 0.02174 | 0.00243 | 0.00203 | 0.04152 | 0.01961 | 0.02506 | 0.02703 | 0.0163  |
| STRADA   | 0.02174 | 0.01942 | 0.00609 | 0.02768 | 0       | 0.02256 | 0       | 0.01087 |
| STRADB   | 0       | 0.00728 | 0.00203 | 0.00692 | 0       | 0.00501 | 0       | 0       |
| TSC1     | 0.01087 | 0.08981 | 0.0071  | 0.03806 | 0.01961 | 0.05263 | 0       | 0.02174 |
| TSC2     | 0       | 0.04369 | 0.00913 | 0.06574 | 0       | 0.05263 | 0       | 0.04891 |
| YWHAB    | 0       | 0.00485 | 0.00304 | 0.01038 | 0       | 0.01754 | 0       | 0.00543 |

| GBM     | HNSC    | KICH    | KIRC    | KIRP    | LAML    | LGG     | LIHC    | LUAD    |
|---------|---------|---------|---------|---------|---------|---------|---------|---------|
| 0.00513 | 0.00791 | 0       | 0       | 0       | 0       | 0.00198 | 0       | 0.00357 |
| 0       | 0.00198 | 0       | 0.00298 | 0.00356 | 0       | 0       | 0.00275 | 0.00535 |
| 0       | 0.01976 | 0       | 0.00298 | 0.01068 | 0       | 0.00198 | 0.00549 | 0.01783 |
| 0.00256 | 0       | 0       | 0.00298 | 0.00356 | 0       | 0.00395 | 0.00549 | 0.00357 |
| 0.00256 | 0.00593 | 0       | 0       | 0       | 0       | 0       | 0       | 0.00713 |
| 0.00513 | 0.00791 | 0       | 0       | 0.01068 | 0.00746 | 0       | 0.00275 | 0.01248 |
| 0.00769 | 0.01383 | 0       | 0       | 0.01068 | 0       | 0.00395 | 0       | 0.01426 |
| 0.00513 | 0.00198 | 0       | 0.00298 | 0.00356 | 0       | 0.00198 | 0.00549 | 0.00357 |
| 0       | 0.00395 | 0       | 0       | 0       | 0       | 0       | 0       | 0       |
| 0.01026 | 0.0415  | 0.01515 | 0.00595 | 0.01779 | 0.00746 | 0.00988 | 0.01648 | 0.0303  |
| 0.00256 | 0       | 0       | 0.00298 | 0.00356 | 0       | 0       | 0       | 0.00178 |
| 0       | 0.00395 | 0       | 0.00298 | 0.00356 | 0       | 0       | 0.00275 | 0.00178 |
| 0       | 0.00198 | 0       | 0       | 0       | 0       | 0.00198 | 0.00275 | 0       |
| 0.00256 | 0.00198 | 0       | 0       | 0.00712 | 0       | 0       | 0       | 0.00357 |
| 0.00256 | 0.00198 | 0       | 0.00298 | 0.00356 | 0       | 0.00198 | 0.00275 | 0.00357 |
| 0.01026 | 0.00395 | 0       | 0       | 0.00712 | 0       | 0.00198 | 0.01374 | 0.00535 |
| 0.01026 | 0.01779 | 0.0303  | 0.07143 | 0.02135 | 0.01493 | 0.01186 | 0.01648 | 0.04635 |
| 0       | 0.00198 | 0       | 0       | 0.00356 | 0       | 0.00198 | 0.00275 | 0.0107  |
| 0.00256 | 0.01186 | 0       | 0       | 0.00356 | 0       | 0.00198 | 0.00824 | 0.01426 |
| 0.00513 | 0.01186 | 0       | 0       | 0       | 0       | 0       | 0.00549 | 0.01783 |
| 0.00256 | 0.00593 | 0       | 0.00298 | 0.00356 | 0.00746 | 0.00198 | 0       | 0.00178 |
| 0       | 0.00198 | 0       | 0       | 0       | 0       | 0       | 0.00824 | 0.00535 |
| 0.00769 | 0.00593 | 0.01515 | 0.01488 | 0.00712 | 0       | 0.00395 | 0.00549 | 0.0107  |
| 0.00513 | 0.00791 | 0       | 0.00595 | 0.02135 | 0       | 0       | 0.01099 | 0.0107  |
| 0.01026 | 0.00395 | 0       | 0       | 0       | 0       | 0.00198 | 0.00549 | 0.01783 |
| 0       | 0.00198 | 0       | 0.00893 | 0.00356 | 0       | 0       | 0.00275 | 0.00713 |
| 0       | 0       | 0       | 0.00298 | 0.00356 | 0       | 0       | 0       | 0.00178 |
| 0.00513 | 0.01186 | 0       | 0.00893 | 0       | 0       | 0.00395 | 0.00549 | 0.00713 |
| 0.01026 | 0.01581 | 0.01515 | 0.00893 | 0.00356 | 0       | 0.00198 | 0.01923 | 0.03209 |
| 0.00769 | 0       | 0       | 0       | 0.00712 | 0       | 0.00395 | 0.00275 | 0.00178 |
| 0.00256 | 0.00198 | 0       | 0       | 0.00356 | 0       | 0.00395 | 0       | 0.01248 |
| 0       | 0.01186 | 0       | 0.00298 | 0       | 0       | 0.00198 | 0       | 0.01604 |
| 0.00513 | 0.00395 | 0       | 0       | 0       | 0       | 0.00198 | 0       | 0.01248 |
| 0.00256 | 0.00988 | 0       | 0.00298 | 0.00356 | 0       | 0.00198 | 0.00824 | 0.00535 |
| 0       | 0.00593 | 0       | 0.00298 | 0.00712 | 0       | 0       | 0.00549 | 0.12656 |
| 0.00256 | 0.01186 | 0       | 0.00298 | 0       | 0       | 0       | 0.01099 | 0.00357 |
| 0.00513 | 0.01779 | 0       | 0       | 0       | 0       | 0.00198 | 0.00275 | 0.00357 |
| 0.01538 | 0.00593 | 0.0303  | 0.01488 | 0.01779 | 0       | 0.00395 | 0.01648 | 0.01426 |
| 0.00513 | 0.00988 | 0.0303  | 0.01488 | 0.02847 | 0       | 0.00593 | 0.03297 | 0.02317 |
| 0.00256 | 0.00395 | 0       | 0.00298 | 0       | 0       | 0.00593 | 0       | 0.00357 |

| LUSC    | MESO   | OV      | PAAD    | PCPG    | PRAD    | READ    | SARC    | SKCM    |         |
|---------|--------|---------|---------|---------|---------|---------|---------|---------|---------|
| 0.01222 |        | 0       | 0.00229 | 0       | 0       | 0.00413 | 0       | 0       | 0.0257  |
| 0.00815 |        | 0       | 0       | 0       | 0       | 0.00207 | 0       | 0.00422 | 0.00857 |
| 0.01222 |        | 0       | 0.00229 | 0       | 0       | 0.00207 | 0.00735 | 0.00844 | 0.03212 |
| 0.00815 |        | 0       | 0.00229 | 0       | 0       | 0.00207 | 0.01471 | 0.00844 | 0.00642 |
| 0.00815 |        | 0       | 0.00459 | 0       | 0       | 0.00207 | 0.02206 | 0.00422 | 0.01927 |
| 0.02648 |        | 0       | 0.00229 | 0       | 0       | 0.0062  | 0.02206 | 0.00422 | 0.04283 |
| 0.01222 |        | 0       | 0.00459 | 0.00633 | 0       | 0.00413 | 0.01471 | 0.00844 | 0.02784 |
| 0.00407 |        | 0       | 0       | 0.00633 | 0       | 0.00207 | 0.01471 | 0       | 0.01285 |
| 0.00407 |        | 0       | 0.00229 | 0       | 0       | 0       | 0       | 0       | 0.00428 |
| 0.02444 |        | 0       | 0.01376 | 0.00633 | 0       | 0.0062  | 0.05147 | 0.01266 | 0.0621  |
| 0       |        | 0       | 0       | 0       | 0       | 0       | 0       | 0.00422 | 0.00214 |
| 0.00204 |        | 0       | 0       | 0       | 0       | 0       | 0.00735 | 0       | 0.00214 |
| 0.00407 |        | 0       | 0       | 0.00633 | 0       | 0       | 0       | 0       | 0       |
| 0.00204 |        | 0       | 0       | 0       | 0       | 0       | 0.00735 | 0.00422 | 0.00428 |
| 0.00204 |        | 0       | 0.00688 | 0.00633 | 0       | 0.00207 | 0       | 0       | 0.00642 |
| 0.00611 |        | 0       | 0.00229 | 0.00633 | 0       | 0.00413 | 0.01471 | 0.00422 | 0.01713 |
| 0.0387  |        | 0       | 0.02064 | 0.01266 | 0.00562 | 0.0062  | 0.00735 | 0       | 0.07923 |
| 0.00815 |        | 0       | 0       | 0       | 0       | 0.00207 | 0.01471 | 0.00422 | 0.01285 |
| 0.00611 |        | 0       | 0       | 0       | 0       | 0       | 0.01471 | 0.00844 | 0.00642 |
| 0.01222 |        | 0       | 0.00688 | 0.00633 | 0       | 0.00413 | 0.02206 | 0.00422 | 0.11135 |
| 0       |        | 0       | 0.00229 | 0.00633 | 0       | 0       | 0.01471 | 0       | 0.01071 |
| 0.00407 |        | 0       | 0.00229 | 0.00633 | 0       | 0       | 0       | 0       | 0.01071 |
| 0.01426 |        | 0       | 0.00459 | 0       | 0.00562 | 0.00413 | 0.00735 | 0       | 0.0364  |
| 0.01018 |        | 0       | 0.00229 | 0       | 0       | 0.00207 | 0.03676 | 0       | 0.05567 |
| 0.02444 |        | 0       | 0.00229 | 0.00633 | 0       | 0.00207 | 0.02206 | 0       | 0.04497 |
| 0.00407 |        | 0       | 0.00229 | 0       | 0       | 0       | 0.01471 | 0       | 0.00428 |
| 0.01222 | 0.0125 | 0.00229 | 0.01266 | 0       | 0       | 0       | 0.02206 | 0.00422 | 0.00642 |
| 0.00407 |        | 0       | 0.00459 | 0       | 0       | 0       | 0       | 0.00844 | 0.01071 |
| 0.02648 |        | 0       | 0.00688 | 0.01266 | 0       | 0.0124  | 0.03676 | 0       | 0.07923 |
| 0.00407 |        | 0       | 0.00459 | 0       | 0       | 0.00207 | 0       | 0       | 0.00214 |
| 0.00407 |        | 0       | 0       | 0.00633 | 0       | 0.00207 | 0.00735 | 0       | 0.01071 |
| 0.00407 |        | 0       | 0.00459 | 0       | 0       | 0       | 0.00735 | 0       | 0.00428 |
| 0.01018 |        | 0       | 0.00459 | 0.01266 | 0       | 0       | 0.03676 | 0       | 0.00214 |
| 0.00204 |        | 0       | 0       | 0       | 0       | 0.00207 | 0.00735 | 0       | 0.01927 |
| 0.00815 |        | 0       | 0       | 0.01899 | 0       | 0.00207 | 0       | 0.00422 | 0.01499 |
| 0.00611 |        | 0       | 0.00229 | 0.00633 | 0       | 0.00207 | 0.00735 | 0       | 0.00642 |
| 0.00611 |        | 0       | 0       | 0.00633 | 0       | 0       | 0.01471 | 0       | 0.01713 |
| 0.02037 | 0.0125 | 0.01376 | 0.00633 | 0       | 0.00207 | 0.02206 | 0.01266 | 0.03426 |         |
| 0.02648 |        | 0       | 0.00917 | 0.01266 | 0       | 0.00826 | 0.02941 | 0.01688 | 0.07066 |
| 0.00204 |        | 0       | 0.00229 | 0.00633 | 0       | 0.00207 | 0       | 0.01688 | 0.00642 |

| STAD    | TGCT   | THCA    | THYM   | UCEC    | UCS     | UVM    |
|---------|--------|---------|--------|---------|---------|--------|
| 0.01386 | 0      | 0.01027 | 0.0082 | 0.04915 | 0       | 0      |
| 0.00693 | 0      | 0       | 0      | 0.03592 | 0       | 0      |
| 0.0254  | 0      | 0.00616 | 0      | 0.06994 | 0       | 0      |
| 0.00462 | 0      | 0       | 0      | 0.04915 | 0       | 0      |
| 0.01617 | 0      | 0       | 0.0082 | 0.06238 | 0       | 0      |
| 0.0254  | 0.0069 | 0       | 0      | 0.06805 | 0.01754 | 0      |
| 0.02079 | 0.0069 | 0       | 0.0082 | 0.05482 | 0.03509 | 0      |
| 0.00924 | 0.0069 | 0       | 0      | 0.03592 | 0.01754 | 0      |
| 0.00693 | 0      | 0       | 0      | 0.00567 | 0       | 0      |
| 0.06928 | 0      | 0       | 0.0082 | 0.10964 | 0       | 0      |
| 0.00231 | 0      | 0       | 0      | 0.03025 | 0       | 0      |
| 0.00462 | 0      | 0       | 0      | 0.01323 | 0       | 0      |
| 0.00693 | 0      | 0       | 0      | 0.01134 | 0       | 0      |
| 0       | 0      | 0       | 0      | 0.01134 | 0       | 0      |
| 0.00693 | 0      | 0.00205 | 0      | 0.0189  | 0.01754 | 0      |
| 0.03002 | 0      | 0       | 0      | 0.03403 | 0       | 0      |
| 0.07852 | 0      | 0       | 0.0082 | 0.12476 | 0       | 0.0125 |
| 0.00924 | 0      | 0       | 0      | 0.06994 | 0       | 0      |
| 0.01386 | 0      | 0       | 0      | 0.07183 | 0       | 0      |
| 0.03233 | 0      | 0       | 0      | 0.06049 | 0       | 0      |
| 0.0254  | 0      | 0       | 0      | 0.03592 | 0       | 0      |
| 0.00693 | 0      | 0       | 0      | 0.04348 | 0       | 0      |
| 0.02771 | 0      | 0       | 0      | 0.05482 | 0       | 0      |
| 0.02079 | 0      | 0       | 0      | 0.0794  | 0       | 0      |
| 0.01617 | 0      | 0       | 0      | 0.05482 | 0       | 0      |
| 0.00693 | 0      | 0       | 0      | 0.02079 | 0       | 0      |
| 0.00693 | 0      | 0       | 0      | 0.04537 | 0       | 0      |
| 0.01848 | 0      | 0       | 0      | 0.09641 | 0       | 0      |
| 0.04157 | 0      | 0.00205 | 0      | 0.09074 | 0       | 0      |
| 0.00231 | 0.0069 | 0       | 0      | 0.04537 | 0       | 0      |
| 0.00693 | 0      | 0       | 0      | 0.07183 | 0.01754 | 0      |
| 0.00462 | 0      | 0       | 0      | 0.03403 | 0       | 0      |
| 0.02079 | 0.0069 | 0.00205 | 0      | 0.05671 | 0       | 0      |
| 0.01386 | 0      | 0       | 0      | 0.05671 | 0.01754 | 0      |
| 0.01155 | 0.0069 | 0       | 0      | 0.03403 | 0       | 0      |
| 0.0254  | 0      | 0       | 0      | 0.06049 | 0       | 0      |
| 0.01848 | 0      | 0       | 0      | 0.04726 | 0       | 0      |
| 0.02771 | 0      | 0       | 0      | 0.10775 | 0.01754 | 0      |
| 0.05774 | 0      | 0       | 0      | 0.08885 | 0       | 0      |
| 0.00924 | 0      | 0       | 0.0082 | 0.07183 | 0       | 0      |

**Table S4: LogFCs of mTOR pathway genes across cancer types**

|          | BLCA    | CHOL    | COAD    | ESCA    | KICH    | KIRC    | KIRP    | LIHC    |
|----------|---------|---------|---------|---------|---------|---------|---------|---------|
| AKT2     | NA      | 0.60265 | 0.40257 | 0.34053 | NA      | -0.3199 | NA      | 0.36222 |
| LAMTOR5  | 0.52249 | 1.82587 | 0.41539 | 0.41353 | -1.3091 | -0.436  | NA      | 0.93962 |
| STK11    | 0.40822 | 1.23211 | 0.36706 | NA      | 0.37868 | 0.25776 | NA      | 0.83079 |
| RRAGC    | 0.31475 | 1.84401 | -0.4335 | 0.8118  | NA      | 0.3416  | 0.5716  | 0.95713 |
| AKT1S1   | 0.73953 | 1.30498 | 0.33678 | 0.36922 | -0.0988 | 0.41751 | 0.26781 | 1.0829  |
| EIF4B    | -0.6276 | 1.67769 | 0.36631 | NA      | NA      | 0.37501 | -0.2225 | 0.47486 |
| EIF4G1   | 0.41223 | 0.57415 | 0.38086 | 0.67929 | NA      | -0.0899 | NA      | 0.43976 |
| PRKAG2   | -1.3997 | -0.4021 | -0.4472 | -0.4527 | 1.28332 | -0.3213 | -0.9273 | -0.3104 |
| STRADA   | 0.48303 | 2.32012 | NA      | NA      | -1.1154 | NA      | 0.39737 | 1.26302 |
| PRKAA2   | -2.3399 | 2.53176 | -1.6804 | -1.4111 | -0.7666 | -0.6595 | -1.1204 | 2.54324 |
| EEF2K    | -0.6488 | 1.40212 | -0.423  | NA      | -0.6597 | 0.81454 | 0.50016 | 0.90013 |
| PRKAB1   | NA      | 1.4625  | NA      | -0.6113 | NA      | -0.6159 | NA      | 0.93717 |
| CAB39    | -0.199  | 1.29594 | -0.7549 | NA      | -0.3922 | -0.7835 | -0.5377 | 0.51995 |
| EIF4EBP1 | 1.68364 | 1.21916 | 1.60253 | 1.44906 | -0.2198 | 2.07449 | 1.22888 | 0.86046 |
| STRADB   | 0.53518 | -0.3935 | -0.803  | NA      | -1.0067 | -0.3161 | -0.4782 | -0.0667 |
| PRKAB2   | NA      | NA      | -0.3366 | -0.4869 | NA      | -0.1965 | -0.4213 | 1.30186 |
| RPS6     | NA      | 1.81621 | 0.70181 | NA      | NA      | 0.55962 | 0.43486 | 0.96202 |
| LAMTOR4  | 0.32125 | 1.67809 | NA      | 0.72919 | NA      | 0.31738 | 0.63362 | 1.32456 |
| EIF4E    | NA      | 1.14912 | 0.2817  | NA      | NA      | -0.4899 | -0.5098 | 0.31035 |
| AKT1     | 0.24352 | 0.4807  | NA      | NA      | 0.65957 | 0.1086  | NA      | NA      |
| RRAGA    | -0.2074 | 0.6021  | -0.0953 | NA      | -0.7614 | 0.21621 | -0.1106 | 0.33246 |
| PRKAG1   | 0.24953 | 1.60421 | 0.20664 | 0.41027 | 0.28526 | NA      | NA      | 0.91563 |
| YWHAB    | 0.43099 | 2.0916  | 0.49207 | 0.62068 | NA      | -0.3894 | -0.1857 | 0.81649 |
| RPTOR    | -0.3709 | 1.69792 | 0.22476 | 0.41568 | 0.29674 | 0.1621  | 0.60755 | 1.30199 |
| RHEB     | NA      | 1.05308 | 0.82528 | 0.9266  | NA      | -0.0836 | 0.39966 | 1.2152  |
| SLC38A9  | 0.68748 | 0.78188 | NA      | 0.44651 | -0.5235 | NA      | 0.33267 | 0.92746 |
| PPM1A    | -0.1771 | NA      | -0.7838 | NA      | 0.6708  | -0.5793 | -0.4067 | 0.18741 |
| PRKAG3   | -0.2491 | NA      | 0.12155 | NA      | -1.3028 | 2.20463 | 1.5876  | 1.14836 |
| PRKAA1   | NA      | 0.67095 | -0.0852 | NA      | -0.2172 | -0.1962 | -0.4394 | NA      |
| LAMTOR3  | NA      | 1.10038 | -0.3793 | NA      | 0.29758 | -0.4541 | -0.3002 | 0.42187 |
| CAB39L   | -0.5006 | 1.85575 | NA      | -1.7566 | -0.8619 | -1.6442 | -1.1368 | NA      |
| RRAGB    | -0.2258 | 2.29953 | 0.39084 | NA      | -0.228  | -0.5115 | -0.2249 | 1.10885 |
| MLST8    | 0.51236 | 1.46796 | 0.80207 | 0.43776 | 0.41098 | 0.18753 | 0.37638 | 1.04551 |
| LAMTOR1  | 0.49423 | 1.69473 | NA      | 0.68833 | 0.26162 | -0.0676 | -0.0496 | 1.10142 |
| RPS6KB1  | NA      | 1.32357 | 0.36937 | 0.45997 | -0.6503 | 0.34749 | 0.37786 | 0.73348 |
| TSC2     | NA      | 1.60288 | 0.22832 | -0.167  | NA      | 0.25205 | 0.13312 | 1.16734 |
| TSC1     | NA      | 1.93196 | NA      | NA      | 0.50946 | NA      | -0.1108 | 1.56729 |
| MTOR     | NA      | 0.45085 | NA      | NA      | -0.6414 | -1.1596 | -0.6745 | 0.81927 |
| RRAGD    | -0.7138 | NA      | -0.0972 | NA      | 1.00062 | -0.5111 | -0.3999 | 1.66105 |
| LAMTOR2  | 1.0619  | 1.06243 | 0.29398 | 0.51668 | -0.6035 | 0.32271 | 0.64783 | 1.20409 |

| LUAD    | LUSC    | PCPG    | PRAD    | READ    | SARC    | STAD    | THCA    | THYM    |
|---------|---------|---------|---------|---------|---------|---------|---------|---------|
| 0.35728 | 0.84693 | -0.9684 | 0.21933 | NA      | NA      | NA      | -0.2965 | -0.5235 |
| 0.5077  | 0.21589 | NA      | 0.33189 | NA      | -1.8814 | 0.37025 | 0.11851 | NA      |
| NA      | 0.48986 | NA      | 0.3372  | NA      | NA      | NA      | 0.23701 | NA      |
| -0.1088 | 0.2361  | NA      | NA      | NA      | NA      | 0.23718 | 0.19741 | NA      |
| 0.4447  | 0.89437 | NA      | 0.51981 | NA      | NA      | NA      | -0.0758 | NA      |
| NA      | NA      | NA      | 0.24557 | NA      | NA      | NA      | NA      | NA      |
| 0.58157 | 1.42416 | -1.1033 | 0.45312 | NA      | NA      | 0.57297 | NA      | NA      |
| NA      | -0.2524 | 0.83691 | NA      | -0.7283 | NA      | -0.4131 | -0.3872 | NA      |
| 0.59664 | 0.53092 | NA      | NA      | NA      | NA      | 0.45996 | NA      | NA      |
| 1.41334 | 0.67992 | NA      | NA      | -2.212  | -3.6147 | -1.4822 | -0.6514 | NA      |
| NA      | NA      | NA      | -0.4365 | NA      | 1.71807 | 0.36265 | NA      | NA      |
| NA      | -0.643  | -1.0802 | -0.1678 | NA      | -2.1104 | 0.32873 | 0.2819  | NA      |
| NA      | -0.2911 | NA      | NA      | -0.617  | NA      | NA      | NA      | NA      |
| 1.73734 | 3.06466 | 1.21218 | 0.75982 | 1.66196 | NA      | 0.80445 | 0.72628 | NA      |
| 0.59533 | NA      | -1.5093 | 0.63304 | NA      | -3.2145 | NA      | 1.01112 | NA      |
| 0.5514  | 0.90884 | NA      | -0.511  | -0.7474 | NA      | NA      | -0.4492 | NA      |
| 0.35513 | NA      | -0.4296 | 0.41963 | NA      | NA      | -0.2775 | 0.11785 | NA      |
| NA      | 0.61975 | NA      | 0.46124 | NA      | NA      | NA      | NA      | NA      |
| 0.33402 | 0.41634 | NA      | NA      | NA      | NA      | NA      | -0.2573 | NA      |
| NA      | NA      | NA      | 0.19335 | NA      | NA      | NA      | 0.2236  | -0.4644 |
| -0.3158 | -0.2684 | NA      | -0.2335 | NA      | NA      | -0.3234 | -0.1118 | NA      |
| 0.33013 | 0.60261 | -0.7374 | 0.09119 | NA      | NA      | 0.18862 | 0.10413 | NA      |
| -0.0727 | 0.14312 | NA      | -0.1603 | NA      | NA      | 0.77528 | 0.07016 | NA      |
| 0.29758 | NA      | NA      | -0.307  | NA      | NA      | 0.32773 | -0.1664 | NA      |
| 0.77912 | 0.6431  | NA      | NA      | NA      | NA      | 0.29344 | NA      | NA      |
| 0.82377 | 0.26965 | NA      | NA      | NA      | NA      | 0.62997 | -0.1661 | NA      |
| NA      | NA      | 0.99388 | NA      | -0.7346 | -1.05   | -0.39   | -0.2047 | NA      |
| -0.7974 | NA      | NA      | -0.2546 | NA      | NA      | NA      | -0.3445 | NA      |
| 0.40843 | NA      | NA      | NA      | NA      | NA      | 0.81892 | -0.3495 | -0.6644 |
| -0.0874 | NA      | NA      | -0.1299 | -0.6789 | NA      | NA      | -0.2538 | NA      |
| -1.2606 | -1.5517 | -0.9035 | NA      | NA      | NA      | -1.7167 | -0.9068 | NA      |
| -0.4011 | NA      | 0.58363 | -0.2638 | NA      | NA      | NA      | -0.2791 | NA      |
| 0.60385 | 0.81518 | NA      | 0.63824 | 1.07128 | NA      | 0.25944 | 0.12117 | NA      |
| NA      | NA      | NA      | 0.21231 | NA      | NA      | NA      | -0.2791 | 0.54998 |
| 0.64736 | 0.53661 | -0.5781 | 0.20908 | NA      | NA      | 0.54424 | -0.2366 | NA      |
| 0.45789 | NA      | 1.19563 | NA      | NA      | NA      | NA      | -0.0821 | NA      |
| NA      | -0.128  | NA      | 0.16599 | NA      | NA      | 0.5077  | -0.3909 | NA      |
| 0.53548 | 0.41521 | NA      | 0.38315 | NA      | NA      | 0.54506 | NA      | NA      |
| -0.3489 | -0.2381 | NA      | NA      | NA      | NA      | NA      | -0.2793 | NA      |
| 0.78537 | 0.36894 | NA      | 0.6266  | NA      | NA      | 0.21994 | 0.38562 | NA      |

UCEC

NA

0.91986

0.3881

-0.2688

0.48556

-0.9773

0.67348

NA

NA

-0.5995

-0.5617

0.70478

-0.6345

2.47919

0.425

-1.1013

NA

0.72481

NA

0.60956

-0.7331

0.2263

NA

-0.3859

NA

NA

-0.7439

0.40658

-0.7864

NA

-2.257

-1.156

0.77369

0.56143

-0.3212

0.4473

-0.4948

0.81188

NA

1.83067





|         |         |         |         |         |         |         |         |         |
|---------|---------|---------|---------|---------|---------|---------|---------|---------|
| KIRP    | LAML    | LIHC    | LUAD    | LUSC    | MESO    | OV      | PAAD    | PCPG    |
| 0.9591  | NA      | 1.10559 | NA      | NA      | NA      | NA      | NA      | NA      |
| 1.00132 | NA      | NA      | NA      | NA      | 0.99911 | NA      | NA      | 0.96659 |
| NA      | NA      | NA      | NA      | NA      | NA      | NA      | NA      | NA      |
| NA      | 0.90496 | NA      | NA      | NA      | 0.73956 | NA      | NA      | NA      |
| NA      | NA      | 1.02203 | NA      | NA      | NA      | NA      | NA      | NA      |
| 1.09337 | NA      | NA      | 1.06481 | NA      | 1.08234 | NA      | NA      | 0.58374 |
| 1.0351  | NA      | 1.01788 | 1.00902 | NA      | NA      | NA      | 1.02943 | NA      |
| NA      | 1.12919 | NA      | NA      | NA      | NA      | NA      | NA      | NA      |
| NA      | NA      | 1.18036 | NA      | NA      | NA      | NA      | NA      | NA      |
| NA      | NA      | 1.10966 | NA      | NA      | 0.84921 | NA      | NA      | NA      |
| 0.87276 | NA      | 1.07513 | NA      | NA      | NA      | NA      | NA      | NA      |
| NA      | NA      | NA      | NA      | NA      | NA      | NA      | NA      | NA      |
| 0.70131 | NA      | NA      | NA      | NA      | NA      | 1.10803 | NA      | NA      |
| NA      | 1.00566 | 1.02528 | NA      | NA      | NA      | NA      | NA      | NA      |
| NA      | NA      | NA      | NA      | NA      | NA      | NA      | 0.55401 | 4.47043 |
| NA      | 0.9336  | 1.05256 | NA      | NA      | 1.16376 | NA      | NA      | NA      |
| 1.01601 | NA      | 1.00988 | NA      | NA      | NA      | NA      | NA      | NA      |
| NA      | NA      | NA      | NA      | NA      | NA      | NA      | NA      | NA      |
| 1.06226 | NA      | NA      | NA      | NA      | NA      | NA      | NA      | NA      |
| 1.31131 | NA      | NA      | NA      | NA      | 1.45205 | NA      | 0.88535 | NA      |
| NA      | NA      | 1.04616 | NA      | NA      | NA      | NA      | NA      | NA      |
| NA      | NA      | 1.22135 | NA      | NA      | NA      | NA      | 0.75906 | NA      |
| NA      | NA      | NA      | 0.88024 | NA      | NA      | NA      | NA      | NA      |
| NA      | 1.1988  | 1.14203 | NA      | NA      | NA      | NA      | NA      | NA      |
| NA      | NA      | NA      | NA      | NA      | NA      | NA      | NA      | NA      |
| 1.06088 | NA      | NA      | NA      | NA      | NA      | NA      | NA      | NA      |
| NA      | NA      | NA      | NA      | NA      | NA      | NA      | NA      | NA      |
| NA      | NA      | 2.08473 | NA      | NA      | NA      | NA      | NA      | NA      |
| NA      | NA      | NA      | NA      | 0.92748 | NA      | NA      | NA      | NA      |
| NA      | 1.06069 | NA      | NA      | NA      | NA      | NA      | NA      | NA      |
| NA      | NA      | NA      | NA      | NA      | NA      | NA      | NA      | NA      |
| 1.01633 | 1.01242 | 1.00413 | NA      | NA      | 1.01116 | NA      | NA      | NA      |
| 1.458   | 0.85153 | NA      | NA      | NA      | NA      | NA      | NA      | NA      |
| 1.05835 | NA      | 1.06239 | NA      | NA      | 1.03171 | NA      | 1.06432 | NA      |
| NA      | NA      | NA      | NA      | NA      | NA      | NA      | NA      | NA      |
| NA      | NA      | NA      | NA      | NA      | NA      | NA      | NA      | NA      |
| NA      | NA      | 1.05005 | NA      | NA      | NA      | NA      | NA      | NA      |
| NA      | 0.9284  | NA      | NA      | NA      | NA      | NA      | NA      | NA      |
| NA      | 1.09593 | 1.04257 | NA      | NA      | NA      | NA      | NA      | 0.44924 |
| 2.58472 | NA      | NA      | NA      | NA      | NA      | NA      | NA      | NA      |



UVM  
NA  
NA  
0.81134  
NA  
NA  
NA  
0.94386  
NA  
NA  
NA  
NA  
NA  
NA  
1.02817  
NA  
1.05324  
0.7005  
NA  
NA  
1.07563  
NA  
NA  
NA  
1.31403  
1.05734  
NA  
NA  
NA  
NA  
3.429

**Table S6: Cluster and mTOR\_score informations**

| ID                           | Cluster | mTOR_score   | P = 1.96e-14 |
|------------------------------|---------|--------------|--------------|
| TCGA-A3-3306-01A-01R-0864-07 | C1      | 0.290522107  |              |
| TCGA-A3-3329-01A-01R-0864-07 | C2      | 0.390999944  |              |
| TCGA-B8-5550-01A-01R-1541-07 | C2      | 0.260471989  |              |
| TCGA-A3-3378-01A-02R-1325-07 | C3      | -0.085558413 |              |
| TCGA-A3-3343-01A-01R-0864-07 | C2      | 0.366230617  |              |
| TCGA-B0-5100-01A-01R-1420-07 | C3      | -0.228030548 |              |
| TCGA-CJ-4869-01A-02R-1426-07 | C3      | -0.250182524 |              |
| TCGA-CJ-4895-01A-01R-1305-07 | C3      | 0.049423812  |              |
| TCGA-B0-5691-01A-11R-1541-07 | C2      | -0.168239657 |              |
| TCGA-B0-5121-01A-02R-1420-07 | C3      | -0.470214129 |              |
| TCGA-B0-5098-01A-01R-1420-07 | C2      | -0.166531385 |              |
| TCGA-A3-3308-01A-02R-1325-07 | C2      | 0.010885035  |              |
| TCGA-BP-4807-01A-01R-1305-07 | C2      | 0.334925575  |              |
| TCGA-B0-5707-01A-11R-1541-07 | C3      | 0.05657192   |              |
| TCGA-BP-4971-01A-01R-1334-07 | C3      | -0.411548837 |              |
| TCGA-B8-4620-01A-02R-1325-07 | C2      | -0.414702796 |              |
| TCGA-BP-4967-01A-01R-1334-07 | C2      | 0.053395026  |              |
| TCGA-BP-5198-01A-01R-1426-07 | C2      | -0.028763917 |              |
| TCGA-BP-4326-01A-01R-1289-07 | C2      | -0.082618532 |              |
| TCGA-CJ-4904-01A-02R-1426-07 | C2      | -0.064384449 |              |
| TCGA-CZ-4853-01A-01R-1426-07 | C2      | 0.1733768    |              |
| TCGA-A3-3387-01A-01R-1541-07 | C2      | 0.077056573  |              |
| TCGA-A3-3326-01A-01R-0864-07 | C2      | 0.010492811  |              |
| TCGA-BP-4784-01A-01R-1305-07 | C2      | -0.083897962 |              |
| TCGA-BP-4766-01A-01R-1289-07 | C2      | 0.332722955  |              |
| TCGA-CZ-5456-01A-01R-1503-07 | C2      | -0.048614572 |              |
| TCGA-CZ-4857-01A-01R-1305-07 | C2      | -0.208361401 |              |
| TCGA-B0-5400-01A-01R-1503-07 | C3      | -0.090643813 |              |
| TCGA-BP-5010-01A-02R-1420-07 | C3      | -0.456320442 |              |
| TCGA-CJ-4644-01A-02R-1325-07 | C2      | 0.265016566  |              |
| TCGA-CJ-6033-01A-11R-1672-07 | C3      | -0.0516457   |              |
| TCGA-EU-5907-01A-11R-1672-07 | C2      | 0.336616001  |              |
| TCGA-B4-5836-01A-11R-1672-07 | C2      | 0.175222403  |              |
| TCGA-A3-3323-01A-02R-1325-07 | C2      | -0.291045352 |              |
| TCGA-BP-4353-01A-02R-1289-07 | C2      | -0.187780567 |              |
| TCGA-B0-5077-01A-01R-1334-07 | C2      | -0.059030968 |              |
| TCGA-CZ-5984-01A-11R-1672-07 | C2      | -0.248696812 |              |
| TCGA-B8-A54G-01A-11R-A266-07 | C3      | -0.186816827 |              |
| TCGA-B0-4713-01A-01R-1277-07 | C3      | -0.182428501 |              |
| TCGA-CZ-5463-01A-01R-1503-07 | C2      | 0.089740389  |              |
| TCGA-6D-AA2E-01A-11R-A37O-07 | C3      | 0.272211519  |              |
| TCGA-CJ-6032-01A-11R-1672-07 | C2      | 0.274468127  |              |
| TCGA-BP-4801-01A-02R-1420-07 | C2      | 0.210537981  |              |
| TCGA-EU-5904-01A-11R-1672-07 | C2      | -0.28225821  |              |
| TCGA-B8-5158-01A-01R-1420-07 | C2      | -0.229092199 |              |
| TCGA-BP-4969-01A-01R-1334-07 | C3      | 0.10091351   |              |
| TCGA-B8-5546-01A-01R-1541-07 | C2      | 0.484032894  |              |

|                              |    |              |
|------------------------------|----|--------------|
| TCGA-B4-5844-01A-11R-1672-07 | C2 | 0.156597401  |
| TCGA-CZ-5452-01A-01R-1503-07 | C3 | 0.029176034  |
| TCGA-BP-4991-01A-01R-1334-07 | C2 | -0.16392819  |
| TCGA-A3-3316-01A-01R-0864-07 | C2 | -0.219526072 |
| TCGA-B8-A54E-01A-11R-A266-07 | C3 | 0.2285716    |
| TCGA-BP-5170-01A-01R-1426-07 | C3 | -0.271333753 |
| TCGA-A3-A6NI-01A-11R-A33J-07 | C2 | 0.052754109  |
| TCGA-B0-5711-01A-11R-1672-07 | C2 | -0.177939887 |
| TCGA-CZ-5451-01A-01R-1503-07 | C2 | 0.159250436  |
| TCGA-BP-4340-01A-01R-1289-07 | C2 | 0.251316661  |
| TCGA-BP-5180-01A-01R-1426-07 | C3 | -0.235190595 |
| TCGA-CJ-4639-01A-02R-1325-07 | C2 | 0.001023488  |
| TCGA-B0-4821-01A-01R-1503-07 | C3 | -0.210514745 |
| TCGA-CZ-4860-01A-01R-1305-07 | C2 | 0.082706485  |
| TCGA-B0-4813-01A-01R-1277-07 | C3 | -0.207418841 |
| TCGA-B8-4619-01A-02R-1325-07 | C1 | 0.216824322  |
| TCGA-CJ-4892-01A-01R-1305-07 | C2 | 0.221796979  |
| TCGA-CJ-4916-01A-01R-1426-07 | C3 | -0.315594713 |
| TCGA-BP-4964-01A-01R-1334-07 | C2 | -0.10136419  |
| TCGA-B0-5712-01A-11R-1672-07 | C2 | 0.106000832  |
| TCGA-BP-4965-01A-01R-1334-07 | C2 | -0.149368646 |
| TCGA-BP-5199-01A-01R-1426-07 | C2 | -0.321214838 |
| TCGA-BP-4973-01A-01R-1334-07 | C2 | -0.051136597 |
| TCGA-B2-5635-01A-01R-A277-07 | C2 | -0.1464586   |
| TCGA-B0-4844-01A-01R-1277-07 | C3 | -0.068315865 |
| TCGA-G6-A8L7-01A-11R-A37O-07 | C3 | -0.199107568 |
| TCGA-B0-5088-01A-01R-1334-07 | C3 | -0.183641591 |
| TCGA-A3-3324-01A-02R-1325-07 | C2 | 0.084624852  |
| TCGA-BP-4968-01A-01R-1334-07 | C2 | -0.022899074 |
| TCGA-BP-4352-01A-01R-1289-07 | C2 | -0.127138206 |
| TCGA-CJ-4872-01A-01R-1305-07 | C2 | -0.27865187  |
| TCGA-DV-A4VZ-01A-11R-A266-07 | C2 | 0.024151103  |
| TCGA-BP-5006-01A-01R-1334-07 | C2 | 0.166532787  |
| TCGA-BP-5009-01A-01R-1334-07 | C2 | -0.485822873 |
| TCGA-B0-4699-01A-01R-1277-07 | C1 | 0.22466137   |
| TCGA-B0-4834-01A-01R-1305-07 | C1 | 0.280980291  |
| TCGA-BP-4998-01A-01R-1334-07 | C2 | -0.275752287 |
| TCGA-B0-5104-01A-01R-1420-07 | C2 | 0.283580402  |
| TCGA-B0-4945-01A-01R-1420-07 | C2 | -0.003442069 |
| TCGA-B0-4842-01A-02R-1420-07 | C3 | -0.201117691 |
| TCGA-AK-3447-01A-01R-1766-07 | C1 | 0.2755227    |
| TCGA-B8-5551-01A-01R-1541-07 | C3 | -0.060684842 |
| TCGA-A3-3349-01A-01R-1188-07 | C2 | -0.21045454  |
| TCGA-B0-4693-01A-01R-1277-07 | C2 | 0.101239857  |
| TCGA-A3-3346-01A-01R-1766-07 | C3 | 0.063716312  |
| TCGA-B0-5120-01A-01R-1420-07 | C2 | -0.24322083  |
| TCGA-BP-5177-01A-01R-1426-07 | C2 | -0.330659841 |
| TCGA-B8-4154-01A-01R-1188-07 | C1 | 0.127730047  |
| TCGA-B8-4153-01B-11R-1672-07 | C3 | -0.129901445 |

|                              |    |              |
|------------------------------|----|--------------|
| TCGA-CJ-6030-01A-11R-1672-07 | C2 | -0.181466936 |
| TCGA-CW-5584-01A-01R-1541-07 | C2 | 0.266607674  |
| TCGA-B0-5696-01A-11R-1541-07 | C3 | 0.298370866  |
| TCGA-BP-4765-01A-01R-1289-07 | C2 | 0.273158257  |
| TCGA-BP-4782-01A-02R-1420-07 | C2 | 0.087345762  |
| TCGA-B8-5165-01A-01R-1420-07 | C2 | -0.124726791 |
| TCGA-B2-3923-01A-02R-A277-07 | C1 | 0.268914217  |
| TCGA-AK-3425-01A-02R-1277-07 | C2 | -0.007357317 |
| TCGA-AS-3778-01A-01R-A32Z-07 | C2 | 0.054969625  |
| TCGA-CW-6087-01A-11R-1672-07 | C2 | -0.059575116 |
| TCGA-B0-5108-01A-01R-1420-07 | C2 | -0.379634239 |
| TCGA-B0-5699-01A-11R-1541-07 | C2 | 0.264695465  |
| TCGA-B0-4814-01A-01R-1277-07 | C2 | 0.179102096  |
| TCGA-AK-3465-01A-02R-1325-07 | C1 | 0.35940383   |
| TCGA-CJ-4918-01A-01R-1426-07 | C2 | -0.319897853 |
| TCGA-BP-4344-01A-01R-1289-07 | C2 | -0.172886909 |
| TCGA-B4-5835-01A-11R-1672-07 | C3 | 0.350976934  |
| TCGA-A3-3372-01A-02R-1325-07 | C2 | -0.13190373  |
| TCGA-BP-4981-01A-01R-1334-07 | C3 | -0.258166157 |
| TCGA-BP-4170-01A-02R-1289-07 | C2 | 0.236316857  |
| TCGA-CJ-4643-01A-02R-1325-07 | C2 | 0.011597403  |
| TCGA-BP-4977-01A-01R-1334-07 | C2 | -0.109333763 |
| TCGA-B2-5633-01A-01R-1541-07 | C2 | -0.415851317 |
| TCGA-A3-3311-01A-02R-1325-07 | C2 | -0.000975274 |
| TCGA-BP-5173-01A-01R-1426-07 | C2 | 0.085497145  |
| TCGA-BP-5007-01A-01R-1334-07 | C2 | -0.144924838 |
| TCGA-A3-3362-01A-02R-1325-07 | C2 | 0.290103751  |
| TCGA-BP-4781-01A-01R-1305-07 | C2 | 0.005887925  |
| TCGA-A3-3365-01A-01R-0864-07 | C2 | 0.049815524  |
| TCGA-DV-A4W0-01A-11R-A266-07 | C2 | -0.230899434 |
| TCGA-B0-5092-01A-01R-1420-07 | C3 | -0.361146742 |
| TCGA-CJ-5683-01A-11R-1541-07 | C2 | 0.184787897  |
| TCGA-BP-4331-01A-01R-1289-07 | C2 | 0.306736831  |
| TCGA-B2-A4SR-01A-11R-A266-07 | C2 | -0.118546599 |
| TCGA-BP-4976-01A-01R-1334-07 | C2 | 0.157100167  |
| TCGA-B2-4099-01A-02R-1188-07 | C1 | 0.127861481  |
| TCGA-B2-3923-01B-10R-A277-07 | C1 | 0.054690821  |
| TCGA-G6-A5PC-01A-11R-A33J-07 | C3 | -0.189974784 |
| TCGA-B0-5812-01A-11R-1672-07 | C2 | -0.031294114 |
| TCGA-BP-4341-01A-01R-1289-07 | C3 | 0.017167103  |
| TCGA-BP-4795-01A-02R-1420-07 | C2 | -0.214768874 |
| TCGA-AK-3451-01A-02R-1188-07 | C3 | 0.007669214  |
| TCGA-CZ-5987-01A-11R-1672-07 | C3 | -0.211096063 |
| TCGA-MM-A564-01A-11R-A266-07 | C3 | -0.135709675 |
| TCGA-BP-4787-01A-01R-1305-07 | C2 | -0.315691949 |
| TCGA-DV-5566-01A-01R-1541-07 | C3 | 0.062396874  |
| TCGA-BP-5190-01A-01R-1426-07 | C3 | -0.166384611 |
| TCGA-BP-4162-01A-02R-1325-07 | C2 | -0.004257146 |
| TCGA-BP-4343-01A-02R-1289-07 | C2 | 0.050894081  |

|                              |    |              |
|------------------------------|----|--------------|
| TCGA-AK-3458-01A-01R-1503-07 | C1 | 0.031093135  |
| TCGA-CZ-5457-01A-01R-1503-07 | C2 | 0.30746882   |
| TCGA-A3-A8OX-01A-11R-A37O-07 | C2 | -0.085289827 |
| TCGA-B0-4817-01A-01R-1277-07 | C3 | -0.277666012 |
| TCGA-CJ-4888-01A-01R-1305-07 | C2 | -0.271267862 |
| TCGA-BP-5191-01A-01R-1426-07 | C3 | -0.410934955 |
| TCGA-B2-5635-01A-01R-1541-07 | C2 | -0.341730717 |
| TCGA-T7-A92I-01A-11R-A37O-07 | C2 | 0.294713323  |
| TCGA-CJ-4901-01A-01R-1426-07 | C2 | -0.446359311 |
| TCGA-G6-A8L8-01A-21R-A37O-07 | C2 | 0.11300279   |
| TCGA-BP-4173-01A-02R-1289-07 | C2 | -0.367753722 |
| TCGA-AK-3434-01A-02R-1277-07 | C2 | -0.150614899 |
| TCGA-BP-4329-01A-02R-1289-07 | C2 | 0.162982384  |
| TCGA-CZ-5462-01A-01R-1503-07 | C2 | 0.048655964  |
| TCGA-B0-4706-01A-01R-1503-07 | C3 | -0.125632916 |
| TCGA-CJ-4920-01A-01R-1426-07 | C2 | -0.16926446  |
| TCGA-B8-A54I-01A-21R-A33J-07 | C3 | -0.187245392 |
| TCGA-CJ-4893-01A-01R-1305-07 | C2 | 0.166051526  |
| TCGA-BP-4960-01A-01R-1334-07 | C3 | -0.409845785 |
| TCGA-B2-3924-01A-02R-1325-07 | C2 | 0.0337603    |
| TCGA-B2-3923-01A-02R-1325-07 | C1 | 0.275396477  |
| TCGA-BP-5185-01A-01R-1426-07 | C3 | -0.241424046 |
| TCGA-A3-3357-01A-02R-1420-07 | C2 | 0.163217234  |
| TCGA-A3-A8CQ-01A-11R-A37O-07 | C2 | 0.206177317  |
| TCGA-BP-5176-01A-01R-1426-07 | C3 | 0.305546403  |
| TCGA-BP-4160-01A-02R-1289-07 | C2 | 0.053723868  |
| TCGA-B2-3924-01A-02R-A277-07 | C2 | 0.158956344  |
| TCGA-B0-4822-01A-01R-1277-07 | C3 | -0.325682934 |
| TCGA-A3-3328-01A-01R-0864-07 | C1 | 0.381104032  |
| TCGA-CW-5583-01A-02R-1541-07 | C2 | 0.088062839  |
| TCGA-B8-4148-01A-02R-1325-07 | C2 | -0.086658369 |
| TCGA-BP-4959-01A-01R-1334-07 | C2 | 0.297232108  |
| TCGA-B0-5097-01A-01R-1420-07 | C2 | -0.207847293 |
| TCGA-CW-6090-01A-11R-1672-07 | C2 | -0.049901284 |
| TCGA-B2-4102-01A-02R-1325-07 | C2 | 0.075776155  |
| TCGA-BP-4799-01A-01R-1305-07 | C2 | -0.377324986 |
| TCGA-BP-4177-01A-02R-1420-07 | C2 | -0.16332681  |
| TCGA-CZ-4858-01A-01R-1305-07 | C2 | -0.193905557 |
| TCGA-AK-3450-01A-02R-1277-07 | C2 | 0.126470603  |
| TCGA-B0-5102-01A-01R-1420-07 | C3 | 0.218282668  |
| TCGA-BP-4167-01A-02R-1325-07 | C3 | -0.107375186 |
| TCGA-BP-4989-01A-01R-1334-07 | C3 | -0.240984849 |
| TCGA-BP-5200-01A-01R-1426-07 | C2 | -0.168305454 |
| TCGA-B0-4818-01A-01R-1503-07 | C2 | 0.205990933  |
| TCGA-B0-4714-01A-01R-1277-07 | C3 | -0.149722805 |
| TCGA-3Z-A93Z-01A-11R-A37O-07 | C2 | 0.227255044  |
| TCGA-DV-5574-01A-01R-1541-07 | C2 | -0.292843182 |
| TCGA-BP-5194-01A-02R-1426-07 | C2 | -0.04330282  |
| TCGA-BP-4961-01A-01R-1334-07 | C2 | -0.125007246 |



|                              |    |              |
|------------------------------|----|--------------|
| TCGA-BP-4963-01A-01R-1334-07 | C2 | -0.076829546 |
| TCGA-AK-3460-01A-02R-1277-07 | C2 | 0.013988468  |
| TCGA-B8-5545-01A-01R-1672-07 | C2 | -0.136914522 |
| TCGA-BP-4165-01A-02R-1289-07 | C3 | -0.060846739 |
| TCGA-DV-A4VX-01A-11R-A266-07 | C3 | 0.086382387  |
| TCGA-B0-4846-01A-01R-1277-07 | C2 | -0.00187116  |
| TCGA-CZ-5453-01A-01R-1503-07 | C2 | 0.142624162  |
| TCGA-B0-5095-01A-01R-1420-07 | C2 | -0.353792042 |
| TCGA-BP-4972-01A-01R-1334-07 | C2 | 0.114528789  |
| TCGA-B0-4712-01A-01R-1503-07 | C3 | 0.058648048  |
| TCGA-BP-4164-01A-02R-1325-07 | C2 | 0.307600055  |
| TCGA-CZ-5454-01A-01R-1503-07 | C2 | 0.070917932  |
| TCGA-BP-5202-01A-02R-1426-07 | C2 | 0.203395683  |
| TCGA-CZ-5470-01A-01R-1503-07 | C3 | -0.115723016 |
| TCGA-CJ-4902-01A-01R-1426-07 | C2 | -0.318867373 |
| TCGA-CJ-4905-01A-02R-1426-07 | C2 | 0.06199709   |
| TCGA-B0-5075-01A-01R-1334-07 | C2 | 0.099046029  |
| TCGA-BP-4798-01A-01R-1305-07 | C2 | -0.020365606 |
| TCGA-CJ-4882-01A-02R-1426-07 | C3 | -0.401882027 |
| TCGA-B0-5706-01A-11R-1541-07 | C2 | -0.276067596 |
| TCGA-CJ-4891-01A-01R-1305-07 | C3 | -0.073017063 |
| TCGA-CZ-5988-01A-11R-1672-07 | C2 | -0.186393164 |
| TCGA-AK-3440-01A-02R-1277-07 | C1 | 0.436771702  |
| TCGA-AK-3453-01A-02R-1277-07 | C3 | -0.290938935 |
| TCGA-B0-5697-01A-11R-1541-07 | C3 | -0.088074506 |
| TCGA-B0-4841-01A-01R-1277-07 | C3 | -0.334831783 |
| TCGA-CJ-5679-01A-11R-1541-07 | C3 | -0.083213053 |
| TCGA-B0-4845-01A-01R-1277-07 | C2 | -0.280574244 |
| TCGA-CZ-5465-01A-01R-1503-07 | C2 | 0.317547839  |
| TCGA-CJ-5686-01A-11R-1672-07 | C2 | 0.016946277  |
| TCGA-BP-4345-01A-01R-1289-07 | C2 | -0.263713859 |
| TCGA-B0-5693-01A-11R-1541-07 | C2 | 0.16665435   |
| TCGA-B0-4838-01A-01R-1305-07 | C2 | 0.166286144  |
| TCGA-B8-5549-01A-01R-1541-07 | C2 | -0.290383871 |
| TCGA-CJ-4876-01A-01R-1305-07 | C3 | -0.049324789 |
| TCGA-BP-4337-01A-01R-1289-07 | C2 | -0.065127278 |
| TCGA-BP-4985-01A-01R-1334-07 | C3 | -0.060704719 |
| TCGA-A3-3374-01A-02R-1325-07 | C1 | 0.377393279  |
| TCGA-A3-3373-01A-02R-1420-07 | C2 | 0.026378874  |
| TCGA-B0-5700-01A-11R-1541-07 | C2 | 0.09352369   |
| TCGA-B4-5378-01A-01R-1503-07 | C2 | -0.192207093 |
| TCGA-B0-5709-01A-11R-1541-07 | C2 | -0.155337496 |
| TCGA-BP-4351-01A-01R-1289-07 | C2 | -0.27125431  |
| TCGA-BP-4774-01A-01R-1289-07 | C2 | -0.140267822 |
| TCGA-BP-4986-01A-01R-1334-07 | C2 | -0.224991459 |
| TCGA-B0-5113-01A-01R-1420-07 | C2 | -0.186627534 |
| TCGA-A3-A6NL-01A-11R-A33J-07 | C2 | -0.069827465 |
| TCGA-CJ-5680-01A-11R-1541-07 | C2 | 0.151660579  |
| TCGA-B0-5402-01A-01R-1503-07 | C2 | -0.124692579 |

|                              |    |              |
|------------------------------|----|--------------|
| TCGA-CZ-4862-01A-01R-1305-07 | C2 | -0.202146514 |
| TCGA-CW-6097-01A-11R-1672-07 | C2 | -0.177682063 |
| TCGA-B4-5843-01A-11R-1672-07 | C2 | 0.110381104  |
| TCGA-A3-3307-01A-01R-0864-07 | C2 | 0.339826466  |
| TCGA-B0-4688-01A-01R-1277-07 | C2 | -0.00631199  |
| TCGA-CJ-5689-01A-11R-1541-07 | C3 | -0.061716889 |
| TCGA-BP-4335-01A-01R-1289-07 | C3 | -0.290608063 |
| TCGA-CJ-4908-01A-01R-1426-07 | C2 | -0.255598946 |
| TCGA-CZ-5458-01A-01R-1503-07 | C2 | 0.145396138  |
| TCGA-B0-4690-01A-01R-1277-07 | C2 | -0.29878689  |
| TCGA-CJ-4900-01A-01R-1334-07 | C3 | -0.334595536 |
| TCGA-A3-3359-01A-01R-0864-07 | C2 | 0.107212441  |
| TCGA-CJ-4907-01A-01R-1426-07 | C2 | -0.155244009 |
| TCGA-CZ-5460-01A-01R-1503-07 | C3 | 0.110578953  |
| TCGA-B8-4622-01A-02R-1277-07 | C2 | -0.142888188 |
| TCGA-BP-4994-01A-01R-1334-07 | C1 | 0.213087876  |
| TCGA-B0-4703-01A-01R-1277-07 | C2 | -0.395714639 |
| TCGA-BP-4346-01A-01R-1289-07 | C2 | -0.045858508 |
| TCGA-B0-4839-01A-01R-1305-07 | C3 | -0.151289946 |
| TCGA-CZ-5985-01A-11R-1672-07 | C2 | -0.132965991 |
| TCGA-CZ-4865-01A-02R-1503-07 | C3 | 0.030830221  |
| TCGA-CJ-5675-01A-11R-1541-07 | C2 | -0.010608826 |
| TCGA-AK-3429-01A-02R-1325-07 | C3 | 0.006319646  |
| TCGA-B0-4843-01A-01R-1277-07 | C3 | -0.267915389 |
| TCGA-CJ-4886-01A-01R-1305-07 | C2 | -0.075964654 |
| TCGA-B0-5083-01A-02R-1420-07 | C1 | 0.211230708  |
| TCGA-B0-5117-01A-01R-1420-07 | C1 | 0.240486901  |
| TCGA-BP-4325-01A-02R-1289-07 | C2 | 0.227195542  |
| TCGA-CW-5580-01A-01R-1672-07 | C2 | 0.100252489  |
| TCGA-BP-5000-01A-01R-1334-07 | C3 | -0.437710448 |
| TCGA-B0-5106-01A-01R-1420-07 | C3 | -0.362831447 |
| TCGA-CJ-6031-01A-11R-1672-07 | C2 | -0.403815018 |
| TCGA-B0-4852-01A-01R-1503-07 | C2 | -0.092677696 |
| TCGA-B0-5690-01A-11R-1541-07 | C2 | -0.215086415 |
| TCGA-B0-4697-01A-01R-1277-07 | C3 | -0.347008956 |
| TCGA-CZ-4859-01A-02R-1426-07 | C2 | 0.397510692  |
| TCGA-BP-4789-01A-01R-1305-07 | C2 | 0.021600049  |
| TCGA-CZ-5989-01A-11R-1672-07 | C1 | -0.059030429 |
| TCGA-A3-3347-01A-02R-1325-07 | C2 | -0.268276907 |
| TCGA-B0-4827-01A-02R-1420-07 | C2 | 0.273884865  |
| TCGA-BP-4760-01A-02R-1420-07 | C2 | -0.165415453 |
| TCGA-CW-5581-01A-02R-1541-07 | C2 | 0.365029513  |
| TCGA-AK-3427-01A-01R-0864-07 | C1 | 0.167324344  |
| TCGA-AK-3445-01A-02R-1277-07 | C3 | -0.266966807 |
| TCGA-BP-4763-01A-01R-1289-07 | C2 | -0.065184945 |
| TCGA-BP-4776-01A-01R-1289-07 | C3 | -0.173307272 |
| TCGA-BP-5008-01A-01R-1334-07 | C2 | -0.226823376 |
| TCGA-B0-5119-01A-02R-1420-07 | C2 | 0.180896963  |
| TCGA-CJ-5684-01A-11R-1541-07 | C3 | 0.078660266  |

|                              |    |              |
|------------------------------|----|--------------|
| TCGA-BP-4338-01A-01R-1289-07 | C2 | 0.127637398  |
| TCGA-B0-5085-01A-01R-1334-07 | C3 | -0.138918366 |
| TCGA-A3-3380-01A-01R-0864-07 | C2 | -0.124764376 |
| TCGA-B0-4691-01A-01R-1277-07 | C3 | -0.39830132  |
| TCGA-B0-5695-01A-11R-1541-07 | C2 | 0.289952055  |
| TCGA-A3-3317-01A-02R-1325-07 | C2 | -0.155961805 |
| TCGA-CJ-5672-01A-11R-1541-07 | C3 | -0.170902197 |
| TCGA-CJ-5677-01A-11R-1541-07 | C3 | 0.053191545  |
| TCGA-A3-3367-01A-02R-1420-07 | C2 | 0.031071417  |
| TCGA-B8-A54K-01A-11R-A33J-07 | C2 | -0.091315619 |
| TCGA-BP-4992-01A-01R-1334-07 | C3 | -0.373104941 |
| TCGA-B0-5705-01A-11R-1541-07 | C2 | 0.202312911  |
| TCGA-CW-6088-01A-11R-1672-07 | C2 | 0.125770795  |
| TCGA-BP-4758-01A-01R-1289-07 | C3 | -0.133056751 |
| TCGA-BP-4355-01A-01R-1289-07 | C3 | -0.223542486 |
| TCGA-CZ-4866-01A-01R-1503-07 | C2 | 0.359288053  |
| TCGA-B8-4621-01A-01R-1503-07 | C3 | 0.214555709  |
| TCGA-BP-4995-01A-01R-1334-07 | C1 | 0.225070028  |
| TCGA-BP-5004-01A-01R-1334-07 | C2 | -0.042858274 |
| TCGA-B8-5162-01A-01R-1420-07 | C2 | -0.141848914 |
| TCGA-B0-4847-01A-01R-1277-07 | C3 | -0.325081123 |
| TCGA-BP-4769-01A-01R-1289-07 | C2 | 0.128458406  |
| TCGA-CZ-5982-01A-11R-1672-07 | C2 | 0.221881419  |
| TCGA-CJ-4870-01A-01R-1305-07 | C3 | 0.134482183  |
| TCGA-AK-3454-01A-02R-1277-07 | C3 | -0.345179254 |
| TCGA-BP-4975-01A-01R-1334-07 | C2 | 0.177724846  |
| TCGA-CW-5585-01A-01R-1541-07 | C2 | 0.281179893  |
| TCGA-B2-4098-01A-02R-1325-07 | C2 | 0.056848629  |
| TCGA-CJ-5678-01A-11R-1541-07 | C3 | -0.066046559 |
| TCGA-B0-5702-01A-11R-1541-07 | C3 | -0.111143084 |
| TCGA-CJ-4638-01A-02R-1325-07 | C3 | -0.271368862 |
| TCGA-DV-5573-01A-01R-1541-07 | C2 | -0.070834328 |
| TCGA-BP-5196-01A-01R-1426-07 | C3 | -0.352194225 |
| TCGA-A3-3351-01A-02R-1325-07 | C2 | -0.149243965 |
| TCGA-B8-A54D-01A-21R-A266-07 | C2 | -0.175192486 |
| TCGA-A3-3322-01A-02R-1325-07 | C2 | 0.050890163  |
| TCGA-B8-A54H-01A-11R-A33J-07 | C2 | 0.072608598  |
| TCGA-A3-A8OW-01A-11R-A37O-07 | C2 | -0.015021514 |
| TCGA-B0-4701-01A-01R-1277-07 | C2 | 0.119583552  |
| TCGA-B2-4101-01A-02R-1277-07 | C2 | -0.179892342 |
| TCGA-A3-3320-01A-02R-1325-07 | C2 | 0.119390977  |
| TCGA-BP-4999-01A-01R-1334-07 | C2 | -0.173409604 |
| TCGA-BP-4161-01A-02R-1325-07 | C2 | 0.105471186  |
| TCGA-B8-4143-01A-01R-1188-07 | C3 | 0.001004801  |
| TCGA-B0-5701-01A-11R-1541-07 | C2 | 0.043791764  |
| TCGA-BP-4797-01A-01R-1305-07 | C2 | 0.061980203  |
| TCGA-DV-A4W0-05A-11R-A266-07 | C2 | -0.141252357 |
| TCGA-BP-4174-01A-02R-1289-07 | C2 | 0.354868849  |
| TCGA-A3-3385-01A-02R-1420-07 | C2 | 0.250342653  |

|                              |    |              |
|------------------------------|----|--------------|
| TCGA-CZ-5469-01A-01R-1503-07 | C3 | -0.164694694 |
| TCGA-BP-4970-01A-01R-1334-07 | C2 | -0.212687026 |
| TCGA-BP-4330-01A-01R-1289-07 | C2 | -0.061675176 |
| TCGA-BP-4349-01A-01R-1289-07 | C2 | -0.114312826 |
| TCGA-AK-3461-01A-02R-1277-07 | C2 | 0.081828229  |
| TCGA-A3-3383-01A-02R-1325-07 | C3 | 0.027487957  |
| TCGA-BP-4159-01A-02R-1289-07 | C2 | -0.13543075  |
| TCGA-B2-5635-01B-04R-A277-07 | C1 | -0.277736784 |
| TCGA-CJ-4889-01A-01R-1305-07 | C2 | -0.199977513 |
| TCGA-BP-4962-01A-01R-1334-07 | C3 | 0.145620943  |
| TCGA-CJ-5682-01A-11R-1541-07 | C3 | 0.03855186   |
| TCGA-BP-4347-01A-01R-1289-07 | C2 | -0.047249263 |
| TCGA-BP-5186-01A-01R-1426-07 | C2 | 0.320561377  |
| TCGA-CZ-4856-01A-02R-1426-07 | C2 | 0.045526564  |
| TCGA-B0-4824-01A-01R-1277-07 | C2 | 0.100173977  |
| TCGA-A3-3376-01A-02R-1420-07 | C2 | -0.149655836 |
| TCGA-CJ-4635-01A-02R-1305-07 | C2 | -0.311790324 |
| TCGA-BP-5183-01A-01R-1426-07 | C2 | -0.123766155 |
| TCGA-A3-A8OV-01A-11R-A37O-07 | C3 | 0.233915724  |
| TCGA-B8-5159-01A-01R-1420-07 | C2 | 0.146726971  |
| TCGA-B8-5163-01A-01R-1420-07 | C2 | -0.268711211 |
| TCGA-CZ-5461-01A-01R-1503-07 | C2 | 0.053148317  |
| TCGA-GK-A6C7-01A-11R-A33J-07 | C2 | -0.011990765 |
| TCGA-BP-4771-01A-01R-1289-07 | C3 | -0.224582914 |
| TCGA-BP-4803-01A-01R-1305-07 | C2 | 0.017595287  |
| TCGA-B2-5639-01A-01R-1541-07 | C2 | 0.332906322  |
| TCGA-CZ-5455-01A-01R-1503-07 | C2 | -0.094066651 |
| TCGA-CJ-4897-01A-03R-1426-07 | C2 | 0.263029402  |
| TCGA-B0-5107-01A-01R-1420-07 | C3 | 0.001475339  |
| TCGA-BP-4759-01A-01R-1289-07 | C3 | -0.021891026 |
| TCGA-B0-4836-01A-01R-1305-07 | C3 | -0.112772743 |
| TCGA-B8-A7U6-01A-12R-A37O-07 | C2 | 0.002744067  |
| TCGA-B2-5636-01A-02R-1541-07 | C2 | -0.17059113  |
| TCGA-A3-3382-01A-02R-1325-07 | C2 | 0.049100322  |
| TCGA-CZ-5464-01A-01R-1503-07 | C2 | -0.388600634 |
| TCGA-CJ-4634-01A-02R-1325-07 | C2 | 0.304459469  |
| TCGA-CJ-6028-01A-11R-1672-07 | C2 | 0.024617602  |
| TCGA-BP-4804-01A-02R-1305-07 | C3 | -0.340825469 |
| TCGA-CJ-4912-01A-01R-1426-07 | C3 | -0.304858147 |
| TCGA-CJ-4873-01A-01R-1305-07 | C3 | -0.313539394 |
| TCGA-CJ-4894-01A-01R-1305-07 | C2 | -0.202952755 |
| TCGA-CW-5588-01A-01R-1541-07 | C2 | -0.097676021 |
| TCGA-A3-3325-01A-01R-0864-07 | C2 | -0.02275591  |
| TCGA-CJ-4871-01A-01R-1305-07 | C2 | -0.009383417 |
| TCGA-CJ-4640-01A-02R-1325-07 | C3 | -0.018196467 |
| TCGA-BP-4762-01A-02R-1289-07 | C2 | 0.041847728  |
| TCGA-B0-5094-01A-01R-1420-07 | C2 | -0.249648487 |
| TCGA-CZ-5467-01A-01R-1503-07 | C2 | 0.146180168  |
| TCGA-A3-3363-01A-01R-0864-07 | C1 | 0.342947121  |

|                              |    |              |
|------------------------------|----|--------------|
| TCGA-CZ-5468-01A-01R-1503-07 | C3 | 0.010578743  |
| TCGA-B2-3924-01B-03R-A277-07 | C1 | -0.21478771  |
| TCGA-BP-5181-01A-01R-1426-07 | C2 | 0.246132346  |
| TCGA-B8-5553-01A-01R-1541-07 | C2 | 0.105173093  |
| TCGA-BP-4761-01A-01R-1289-07 | C3 | -0.112148035 |
| TCGA-B2-5633-01A-01R-A277-07 | C2 | -0.142609125 |
| TCGA-A3-3358-01A-01R-1541-07 | C2 | 0.141161868  |
| TCGA-CZ-4864-01A-01R-1503-07 | C2 | 0.048456032  |
| TCGA-AK-3436-01A-02R-1325-07 | C3 | -0.016903865 |
| TCGA-CZ-5466-01A-01R-1503-07 | C2 | -0.125583371 |
| TCGA-B0-5080-01A-01R-1503-07 | C2 | -0.237932648 |
| TCGA-CZ-4861-01A-01R-1305-07 | C2 | -0.150873125 |
| TCGA-CJ-5671-01A-11R-1541-07 | C2 | -0.294921724 |
| TCGA-AK-3431-01A-02R-1277-07 | C2 | 0.0999422    |
| TCGA-B0-4811-01A-01R-1503-07 | C3 | -0.306636214 |
| TCGA-A3-3313-01A-02R-1325-07 | C2 | 0.218486292  |
| TCGA-B8-5552-01B-11R-1672-07 | C2 | -0.267747828 |
| TCGA-CJ-6027-01A-11R-1672-07 | C3 | -0.166836718 |
| TCGA-BP-4756-01A-01R-1289-07 | C2 | 0.403553622  |
| TCGA-A3-3319-01A-02R-1325-07 | C2 | -0.107608995 |
| TCGA-MW-A4EC-01A-11R-A266-07 | C2 | 0.151669096  |
| TCGA-B0-4816-01A-01R-1503-07 | C2 | -0.012102995 |
| TCGA-CZ-4863-01A-01R-1503-07 | C2 | 0.091566972  |
| TCGA-B0-5110-01A-01R-1420-07 | C2 | 0.023630422  |
| TCGA-CZ-5986-01A-11R-1672-07 | C2 | -0.084771963 |
| TCGA-B0-4828-01A-01R-1277-07 | C2 | 0.036690317  |
| TCGA-B8-4151-01A-01R-1188-07 | C2 | 0.336570484  |
| TCGA-EU-5905-01A-11R-1672-07 | C2 | -0.42547759  |
| TCGA-CJ-4903-01A-01R-1426-07 | C2 | 0.025702069  |
| TCGA-B0-5698-01A-11R-1672-07 | C2 | 0.032168492  |
| TCGA-B0-4815-01A-01R-1503-07 | C2 | -0.27629269  |
| TCGA-B0-5081-01A-01R-1334-07 | C2 | -0.431189686 |
| TCGA-A3-3352-01A-01R-0864-07 | C2 | 0.270800861  |
| TCGA-A3-A6NJ-01A-12R-A33J-07 | C2 | 0.229416015  |
| TCGA-BP-5184-01A-01R-1426-07 | C2 | 0.130689972  |
| TCGA-CJ-4899-01A-01R-1334-07 | C2 | -0.085024567 |
| TCGA-CJ-4881-01A-01R-1305-07 | C3 | -0.246126928 |
| TCGA-CJ-4878-01A-01R-1305-07 | C2 | 0.214419022  |
| TCGA-B0-4819-01A-01R-1277-07 | C3 | -0.449528151 |
| TCGA-B0-4710-01A-01R-1503-07 | C2 | 0.038292134  |
| TCGA-A3-3331-01A-02R-1325-07 | C2 | -0.002467913 |
| TCGA-BP-5174-01A-01R-1426-07 | C3 | 0.098991615  |
| TCGA-B0-5694-01A-11R-1541-07 | C2 | -0.374181261 |
| TCGA-B0-5116-01A-02R-1420-07 | C2 | -0.145093517 |
| TCGA-DV-5567-01A-01R-1541-07 | C2 | -0.113887648 |
| TCGA-BP-5169-01A-01R-1426-07 | C3 | -0.209200092 |
| TCGA-B0-4700-01A-02R-1541-07 | C3 | -0.281547761 |
| TCGA-AK-3433-01A-02R-1277-07 | C1 | 0.410429455  |
| TCGA-CJ-4875-01A-01R-1305-07 | C3 | -0.210147741 |

|                              |    |              |
|------------------------------|----|--------------|
| TCGA-A3-3335-01A-01R-0864-07 | C3 | 0.01995609   |
| TCGA-B0-5115-01A-01R-1420-07 | C2 | -0.075033059 |
| TCGA-BP-5195-01A-02R-1426-07 | C2 | -0.019972216 |
| TCGA-BP-4354-01A-02R-1289-07 | C2 | -0.209135887 |
| TCGA-BP-4974-01A-01R-1334-07 | C2 | -0.210558633 |
| TCGA-CJ-4641-01A-02R-1325-07 | C3 | -0.11667659  |
| TCGA-B4-5834-01A-11R-1672-07 | C2 | -0.057726239 |
| TCGA-BP-4169-01A-02R-1289-07 | C2 | -0.024005347 |
| TCGA-B2-5633-01B-04R-A277-07 | C1 | -0.29582728  |
| TCGA-BP-4777-01A-01R-1289-07 | C2 | 0.05495467   |
| TCGA-B0-5399-01A-01R-1503-07 | C2 | -0.121719742 |
| TCGA-B0-5099-01A-01R-1420-07 | C2 | 0.074781105  |
| TCGA-BP-4166-01A-02R-1289-07 | C2 | 0.31858842   |
| TCGA-CJ-4890-01A-01R-1305-07 | C2 | -0.337863787 |
| TCGA-B0-5084-01A-01R-1334-07 | C2 | -0.290088392 |
| TCGA-BP-5168-01A-01R-1420-07 | C2 | 0.239228507  |
| TCGA-BP-4770-01A-01R-1503-07 | C3 | -0.249553223 |
| TCGA-BP-4332-01A-01R-1289-07 | C2 | 0.031221283  |
| TCGA-B4-5832-01A-11R-1672-07 | C1 | -0.053050163 |
| TCGA-B0-4849-01A-01R-1277-07 | C3 | 0.035930783  |
| TCGA-B8-5164-01A-01R-1420-07 | C2 | 0.12779752   |
| TCGA-CW-6093-01A-11R-1672-07 | C2 | 0.127875002  |
| TCGA-MM-A84U-01A-11R-A37O-07 | C3 | -0.115336537 |
| TCGA-CJ-4637-01A-02R-1325-07 | C3 | -0.016660202 |
| TCGA-CJ-4642-01B-01R-1305-07 | C2 | -0.334233049 |
| TCGA-BP-5178-01A-01R-1426-07 | C3 | -0.284156383 |
| TCGA-BP-4790-01A-01R-1305-07 | C2 | -0.119380687 |
| TCGA-B0-5692-01A-11R-1541-07 | C3 | -0.055525147 |
| TCGA-CJ-4885-01A-01R-1305-07 | C2 | 0.211040686  |
| TCGA-BP-4768-01A-01R-1289-07 | C2 | 0.123665243  |
| TCGA-B0-5713-01A-11R-1672-07 | C2 | 0.294290153  |
| TCGA-CW-5587-01A-01R-1541-07 | C2 | 0.123593839  |
| TCGA-BP-5201-01A-01R-1426-07 | C3 | -0.37664159  |
| TCGA-CW-5590-01A-01R-1541-07 | C2 | 0.100243894  |
| TCGA-A3-3370-01A-02R-1420-07 | C2 | -0.098447545 |
| TCGA-B0-4848-01A-01R-1277-07 | C3 | 0.261601841  |
| TCGA-B0-4698-01A-01R-1503-07 | C2 | -0.028704676 |
| TCGA-BP-4982-01A-01R-1334-07 | C2 | -0.138074844 |
| TCGA-CJ-4636-01A-02R-1325-07 | C2 | -0.282121266 |
| TCGA-AK-3455-01A-01R-0864-07 | C1 | 0.285357941  |
| TCGA-A3-A6NN-01A-12R-A33J-07 | C2 | 0.084512496  |
| TCGA-G6-A8L6-01A-11R-A37O-07 | C3 | -0.112017256 |
| TCGA-B0-5703-01A-11R-1541-07 | C2 | -0.018577112 |
| TCGA-BP-4176-01A-02R-1289-07 | C2 | -0.216506087 |
| TCGA-B0-4707-01A-01R-1277-07 | C3 | -0.273643552 |
| TCGA-CW-5591-01A-01R-1541-07 | C2 | 0.204982713  |
| TCGA-B4-5838-01A-11R-1672-07 | C2 | 0.329794256  |
| TCGA-BP-4775-01A-01R-1289-07 | C2 | -0.09610656  |
| TCGA-BP-4158-01A-02R-1289-07 | C2 | 0.133653807  |

|                              |    |              |
|------------------------------|----|--------------|
| TCGA-CJ-5676-01A-11R-1541-07 | C3 | -0.277269549 |
| TCGA-DV-5565-01A-01R-1541-07 | C3 | -0.088518565 |
| TCGA-BP-4163-01A-02R-1325-07 | C2 | 0.221096997  |
| TCGA-BP-4327-01A-01R-1289-07 | C2 | 0.148054757  |
| TCGA-BP-5182-01A-01R-1426-07 | C3 | 0.171795266  |
| TCGA-CJ-4884-01A-01R-1305-07 | C3 | 0.005547216  |
| TCGA-CZ-5459-01A-01R-1503-07 | C2 | -0.266489479 |
| TCGA-B0-5096-01A-01R-1420-07 | C2 | 0.057962025  |
| TCGA-B8-A54J-01A-11R-A33J-07 | C2 | -0.131638245 |
| TCGA-BP-4987-01A-01R-1334-07 | C2 | 0.114498603  |
| TCGA-B2-5641-01A-01R-1541-07 | C2 | -0.136648101 |
| TCGA-AK-3426-01A-02R-1325-07 | C3 | -0.443500483 |
| TCGA-B4-5377-01A-01R-1503-07 | C2 | 0.373436305  |
| TCGA-BP-4342-01A-01R-1289-07 | C2 | -0.279448311 |
| TCGA-BP-4983-01A-01R-1334-07 | C2 | -0.062704158 |
| TCGA-B0-4833-01A-01R-1305-07 | C3 | -0.209742992 |
| TCGA-AS-3777-01A-01R-0864-07 | C1 | 0.020696387  |
| TCGA-CJ-4874-01A-01R-1305-07 | C2 | 0.214593499  |
| TCGA-CJ-4887-01A-01R-1305-07 | C3 | -0.087134299 |
| TCGA-AK-3428-01A-02R-1277-07 | C2 | 0.210086263  |
| TCGA-B8-A54F-01A-11R-A266-07 | C2 | -0.186309069 |
| TCGA-BP-5187-01A-01R-1426-07 | C2 | -0.372242502 |
| TCGA-CJ-5681-01A-11R-1541-07 | C2 | 0.369953456  |
| TCGA-B0-4696-01A-01R-1277-07 | C2 | -0.1373644   |
| TCGA-B0-5710-01A-11R-1672-07 | C2 | -0.240352152 |
| TCGA-BP-5175-01A-01R-1426-07 | C3 | -0.372066408 |
| TCGA-DV-5569-01A-01R-1541-07 | C2 | -0.193154935 |
| TCGA-BP-5189-01A-02R-1426-07 | C2 | -0.184337428 |
| TCGA-AK-3443-01A-02R-1325-07 | C1 | 0.412703051  |
| TCGA-CW-5589-01A-01R-1541-07 | C2 | -0.031774764 |
| TCGA-B0-5109-01A-02R-1420-07 | C3 | -0.094838778 |
| TCGA-B8-A8YJ-01A-13R-A39I-07 | C2 | -0.281329946 |
| TCGA-B0-4810-01A-01R-1503-07 | C2 | -0.148979745 |
| TCGA-BP-5001-01A-01R-1334-07 | C3 | -0.160116735 |
| TCGA-EU-5906-01A-11R-1672-07 | C2 | -0.113752108 |
| TCGA-BP-4993-01A-02R-1420-07 | C2 | -0.196206059 |
| TCGA-B0-4823-01A-02R-1420-07 | C2 | -0.00184817  |
| TCGA-DV-5576-01A-01R-1541-07 | C2 | -0.148650585 |
| TCGA-MM-A563-01A-11R-A266-07 | C3 | -0.20753182  |
| TCGA-BP-5192-01A-01R-1426-07 | C2 | 0.169914106  |
| TCGA-CJ-4868-01A-01R-1305-07 | C3 | -0.229656759 |
| TCGA-A3-A8OU-01A-11R-A37O-07 | C2 | -0.055625342 |
| TCGA-B0-4718-01A-01R-1277-07 | C3 | -0.171704384 |
| TCGA-DV-5568-01A-01R-1541-07 | C3 | -0.114233325 |
| TCGA-AK-3456-01A-02R-1325-07 | C2 | 0.447884785  |
| TCGA-B0-4837-01A-01R-1305-07 | C3 | -0.257218689 |
| TCGA-B0-4694-01A-01R-1277-07 | C3 | 0.073624075  |
| TCGA-BP-4334-01A-01R-1289-07 | C1 | 0.211329236  |
| TCGA-B8-4146-01B-11R-1672-07 | C1 | -0.037176125 |

|                              |    |              |
|------------------------------|----|--------------|
| TCGA-CZ-4854-01A-01R-1305-07 | C2 | 0.007608276  |
| TCGA-DV-5575-01A-01R-1541-07 | C2 | -0.110554902 |



**Table S7: Expression of mTOR gene in KIRC**

|          | TCGA-A3- | TCGA-A3- | TCGA-B8- | TCGA-A3- | TCGA-A3- | TCGA-B0- | TCGA-CJ- | TCGA-CJ- |
|----------|----------|----------|----------|----------|----------|----------|----------|----------|
| PRKAB1   | DOWN     | NOCHAN(  | NOCHAN(  | NOCHAN(  | NOCHAN(  | DOWN     | DOWN     | NOCHAN(  |
| YWHAB    | DOWN     | DOWN     | NOCHAN(  | NOCHAN(  | DOWN     | DOWN     | DOWN     | NOCHAN(  |
| CAB39    | DOWN     | DOWN     | DOWN     | DOWN     | DOWN     | DOWN     | DOWN     | DOWN     |
| STK11    | NOCHAN(  | NOCHAN(  | NOCHAN(  | NOCHAN(  | NOCHAN(  | UP       | UP       | NOCHAN(  |
| STRADA   | NOCHAN(  | NOCHAN(  | NOCHAN(  | UP       | NOCHAN(  | NOCHAN(  | NOCHAN(  | NOCHAN(  |
| EIF4E    | NOCHAN(  | NOCHAN(  | DOWN     | DOWN     | DOWN     | DOWN     | DOWN     | DOWN     |
| PRKAG2   | NOCHAN(  | NOCHAN(  | NOCHAN(  | DOWN     | NOCHAN(  | NOCHAN(  | DOWN     | DOWN     |
| RPTOR    | DOWN     | NOCHAN(  | UP       | NOCHAN(  | NOCHAN(  | NOCHAN(  | NOCHAN(  | NOCHAN(  |
| AKT1S1   | NOCHAN(  | UP       | NOCHAN(  | UP       | UP       | UP       | UP       | UP       |
| PRKAA2   | NOCHAN(  | NOCHAN(  | DOWN     | DOWN     | NOCHAN(  | DOWN     | DOWN     | DOWN     |
| PRKAG3   | NOCHAN(  | UP       | NOCHAN(  | NOCHAN(  | NOCHAN(  | NOCHAN(  | NOCHAN(  | NOCHAN(  |
| LAMTOR1  | NOCHAN(  | NOCHAN(  | NOCHAN(  | NOCHAN(  | NOCHAN(  | NOCHAN(  | NOCHAN(  | NOCHAN(  |
| STRADB   | NOCHAN(  | NOCHAN(  | UP       | NOCHAN(  | NOCHAN(  | DOWN     | NOCHAN(  | NOCHAN(  |
| MLST8    | UP       | NOCHAN(  | UP       | NOCHAN(  | NOCHAN(  | NOCHAN(  | NOCHAN(  | NOCHAN(  |
| EIF4G1   | NOCHAN(  | NOCHAN(  | NOCHAN(  | NOCHAN(  | NOCHAN(  | DOWN     | NOCHAN(  | NOCHAN(  |
| RPS6     | UP       | NOCHAN(  | NOCHAN(  | DOWN     | UP       | UP       | NOCHAN(  | NOCHAN(  |
| TSC1     | NOCHAN(  | NOCHAN(  | NOCHAN(  | NOCHAN(  | UP       | NOCHAN(  | DOWN     | NOCHAN(  |
| EEF2K    | NOCHAN(  | NOCHAN(  | UP       | UP       | NOCHAN(  | NOCHAN(  | NOCHAN(  | NOCHAN(  |
| LAMTOR3  | NOCHAN(  | NOCHAN(  | DOWN     | DOWN     | NOCHAN(  | DOWN     | NOCHAN(  | NOCHAN(  |
| RRAGB    | DOWN     | NOCHAN(  | DOWN     | NOCHAN(  | NOCHAN(  | DOWN     | DOWN     | NOCHAN(  |
| PPM1A    | DOWN     | NOCHAN(  | DOWN     | DOWN     | NOCHAN(  | DOWN     | DOWN     | DOWN     |
| LAMTOR5  | NOCHAN(  | NOCHAN(  | DOWN     | DOWN     | NOCHAN(  | DOWN     | DOWN     | NOCHAN(  |
| EIF4EBP1 | UP       | UP       | UP       | UP       | UP       | UP       | UP       | UP       |
| PRKAB2   | NOCHAN(  | NOCHAN(  | NOCHAN(  | NOCHAN(  | UP       | DOWN     | DOWN     | NOCHAN(  |
| SLC38A9  | NOCHAN(  | NOCHAN(  | NOCHAN(  | NOCHAN(  | NOCHAN(  | DOWN     | DOWN     | NOCHAN(  |
| AKT2     | NOCHAN(  | NOCHAN(  | NOCHAN(  | NOCHAN(  | NOCHAN(  | NOCHAN(  | DOWN     | NOCHAN(  |
| MTOR     | DOWN     | DOWN     | NOCHAN(  | NOCHAN(  | DOWN     | DOWN     | DOWN     | DOWN     |
| PRKAG1   | UP       | NOCHAN(  | NOCHAN(  | NOCHAN(  | NOCHAN(  | DOWN     | NOCHAN(  | NOCHAN(  |
| AKT1     | NOCHAN(  | NOCHAN(  | NOCHAN(  | NOCHAN(  | NOCHAN(  | UP       | NOCHAN(  | NOCHAN(  |
| RHEB     | NOCHAN(  | NOCHAN(  | NOCHAN(  | DOWN     | NOCHAN(  | NOCHAN(  | NOCHAN(  | NOCHAN(  |
| LAMTOR2  | UP       | NOCHAN(  | NOCHAN(  | NOCHAN(  | NOCHAN(  | UP       | UP       | NOCHAN(  |
| PRKAA1   | NOCHAN(  | NOCHAN(  | NOCHAN(  | DOWN     | NOCHAN(  | DOWN     | DOWN     | DOWN     |
| RPS6KB1  | NOCHAN(  | UP       | UP       | UP       | NOCHAN(  | NOCHAN(  | NOCHAN(  | UP       |
| LAMTOR4  | UP       | NOCHAN(  | NOCHAN(  | DOWN     | NOCHAN(  | UP       | NOCHAN(  | NOCHAN(  |
| RRAGA    | NOCHAN(  | NOCHAN(  | UP       | NOCHAN(  | NOCHAN(  | NOCHAN(  | UP       | NOCHAN(  |
| RRAGD    | NOCHAN(  | NOCHAN(  | NOCHAN(  | NOCHAN(  | NOCHAN(  | DOWN     | DOWN     | NOCHAN(  |
| CAB39L   | NOCHAN(  | DOWN     | DOWN     | DOWN     | DOWN     | NOCHAN(  | DOWN     | DOWN     |
| RRAGC    | UP       | UP       | NOCHAN(  | UP       | UP       | NOCHAN(  | UP       | UP       |
| EIF4B    | UP       | UP       | NOCHAN(  | DOWN     | UP       | NOCHAN(  | NOCHAN(  | NOCHAN(  |
| TSC2     | NOCHAN(  | NOCHAN(  | NOCHAN(  | NOCHAN(  | UP       | NOCHAN(  | NOCHAN(  | NOCHAN(  |

| TCGA-B0- | TCGA-B0- | TCGA-B0- | TCGA-A3- | TCGA-BP- | TCGA-B0- | TCGA-BP- | TCGA-B8- | TCGA-BP- |
|----------|----------|----------|----------|----------|----------|----------|----------|----------|
| NOCHAN(  | DOWN     | DOWN     | DOWN     | NOCHAN(  | NOCHAN(  | DOWN     | DOWN     | DOWN     |
| NOCHAN(  | DOWN     | DOWN     | NOCHAN(  | NOCHAN(  | UP       | DOWN     | DOWN     | DOWN     |
| NOCHAN(  | DOWN     | DOWN     | DOWN     | NOCHAN(  | DOWN     | DOWN     | DOWN     | DOWN     |
| NOCHAN(  | NOCHAN(  | NOCHAN(  | NOCHAN(  | NOCHAN(  | NOCHAN(  | NOCHAN(  | NOCHAN(  | NOCHAN(  |
| NOCHAN(  | NOCHAN(  | UP       | NOCHAN(  | NOCHAN(  | NOCHAN(  | UP       | NOCHAN(  | NOCHAN(  |
| DOWN     | DOWN     | DOWN     | NOCHAN(  | DOWN     | DOWN     | DOWN     | DOWN     | DOWN     |
| NOCHAN(  | DOWN     | DOWN     | DOWN     | DOWN     | DOWN     | NOCHAN(  | DOWN     | NOCHAN(  |
| NOCHAN(  | DOWN     | UP       | UP       | NOCHAN(  | UP       | DOWN     | NOCHAN(  | NOCHAN(  |
| NOCHAN(  | NOCHAN(  | UP       | NOCHAN(  | NOCHAN(  | UP       | NOCHAN(  | NOCHAN(  | NOCHAN(  |
| NOCHAN(  | DOWN     | DOWN     | DOWN     | UP       | DOWN     | DOWN     | DOWN     | NOCHAN(  |
| NOCHAN(  | NOCHAN(  | UP       | NOCHAN(  | NOCHAN(  | NOCHAN(  | UP       | NOCHAN(  | NOCHAN(  |
| NOCHAN(  | NOCHAN(  | NOCHAN(  | NOCHAN(  | NOCHAN(  | NOCHAN(  | DOWN     | NOCHAN(  | DOWN     |
| NOCHAN(  | NOCHAN(  | NOCHAN(  | NOCHAN(  | NOCHAN(  | NOCHAN(  | NOCHAN(  | NOCHAN(  | NOCHAN(  |
| NOCHAN(  | DOWN     | UP       | NOCHAN(  | NOCHAN(  | UP       | NOCHAN(  | NOCHAN(  | NOCHAN(  |
| NOCHAN(  | DOWN     | UP       | UP       | NOCHAN(  | UP       | DOWN     | NOCHAN(  | NOCHAN(  |
| NOCHAN(  | NOCHAN(  | NOCHAN(  | NOCHAN(  | NOCHAN(  | NOCHAN(  | NOCHAN(  | NOCHAN(  | NOCHAN(  |
| NOCHAN(  | NOCHAN(  | NOCHAN(  | NOCHAN(  | NOCHAN(  | DOWN     | UP       | NOCHAN(  | NOCHAN(  |
| NOCHAN(  | NOCHAN(  | UP       | UP       | NOCHAN(  | NOCHAN(  | UP       | NOCHAN(  | UP       |
| NOCHAN(  | DOWN     | DOWN     | DOWN     | NOCHAN(  | DOWN     | DOWN     | DOWN     | NOCHAN(  |
| DOWN     | DOWN     | NOCHAN(  | NOCHAN(  | DOWN     | DOWN     | NOCHAN(  | NOCHAN(  | NOCHAN(  |
| NOCHAN(  | DOWN     | DOWN     | NOCHAN(  | NOCHAN(  | DOWN     | DOWN     | DOWN     | DOWN     |
| NOCHAN(  | NOCHAN(  | DOWN     | DOWN     | NOCHAN(  | NOCHAN(  | DOWN     | DOWN     | NOCHAN(  |
| NOCHAN(  | UP       | UP       | UP       | UP       | UP       | UP       | UP       | NOCHAN(  |
| NOCHAN(  | DOWN     | DOWN     | NOCHAN(  | NOCHAN(  | DOWN     | NOCHAN(  | NOCHAN(  | NOCHAN(  |
| NOCHAN(  | DOWN     | NOCHAN(  | NOCHAN(  | NOCHAN(  | NOCHAN(  | NOCHAN(  | NOCHAN(  | NOCHAN(  |
| NOCHAN(  | DOWN     | NOCHAN(  | NOCHAN(  | NOCHAN(  | NOCHAN(  | NOCHAN(  | DOWN     | NOCHAN(  |
| NOCHAN(  | DOWN     | DOWN     | NOCHAN(  | DOWN     | NOCHAN(  | DOWN     | DOWN     | DOWN     |
| NOCHAN(  | DOWN     | NOCHAN(  | NOCHAN(  | NOCHAN(  | NOCHAN(  | DOWN     | DOWN     | DOWN     |
| NOCHAN(  | NOCHAN(  | NOCHAN(  | UP       | UP       | NOCHAN(  | NOCHAN(  | NOCHAN(  | NOCHAN(  |
| DOWN     | DOWN     | UP       | NOCHAN(  | NOCHAN(  | NOCHAN(  | DOWN     | NOCHAN(  | NOCHAN(  |
| DOWN     | NOCHAN(  | UP       | NOCHAN(  | NOCHAN(  | UP       | NOCHAN(  | NOCHAN(  | DOWN     |
| NOCHAN(  | DOWN     | DOWN     | NOCHAN(  | NOCHAN(  | DOWN     | DOWN     | NOCHAN(  | NOCHAN(  |
| NOCHAN(  | NOCHAN(  | NOCHAN(  | UP       | NOCHAN(  | NOCHAN(  | NOCHAN(  | UP       | NOCHAN(  |
| NOCHAN(  | NOCHAN(  | NOCHAN(  | NOCHAN(  | NOCHAN(  | UP       | NOCHAN(  | NOCHAN(  | NOCHAN(  |
| NOCHAN(  | NOCHAN(  | DOWN     | NOCHAN(  | UP       | NOCHAN(  | DOWN     | NOCHAN(  | NOCHAN(  |
| NOCHAN(  | NOCHAN(  | NOCHAN(  | DOWN     | NOCHAN(  | NOCHAN(  | DOWN     | DOWN     | NOCHAN(  |
| NOCHAN(  | DOWN     | DOWN     | DOWN     | DOWN     | NOCHAN(  | DOWN     | DOWN     | DOWN     |
| NOCHAN(  | NOCHAN(  | UP       | NOCHAN(  | UP       | NOCHAN(  | NOCHAN(  | NOCHAN(  | NOCHAN(  |
| UP       | NOCHAN(  | UP       | NOCHAN(  | UP       | DOWN     | DOWN     | NOCHAN(  | UP       |
| UP       | NOCHAN(  | UP       | UP       | NOCHAN(  | NOCHAN(  | UP       | NOCHAN(  | UP       |

| TCGA-BP- | TCGA-BP- | TCGA-CJ- | TCGA-CZ- | TCGA-A3- | TCGA-A3- | TCGA-BP- | TCGA-BP- | TCGA-CZ- |
|----------|----------|----------|----------|----------|----------|----------|----------|----------|
| DOWN     | DOWN     | NOCHAN(  | NOCHAN(  | DOWN     | NOCHAN(  | DOWN     | NOCHAN(  | DOWN     |
| NOCHAN(  | DOWN     | NOCHAN(  | DOWN     | NOCHAN(  | DOWN     | NOCHAN(  | NOCHAN(  | NOCHAN(  |
| DOWN     | DOWN     | DOWN     | DOWN     | DOWN     | DOWN     | DOWN     | NOCHAN(  | DOWN     |
| NOCHAN(  | NOCHAN(  | NOCHAN(  | NOCHAN(  | NOCHAN(  | NOCHAN(  | UP       | UP       | NOCHAN(  |
| DOWN     | NOCHAN(  | NOCHAN(  | NOCHAN(  | NOCHAN(  | NOCHAN(  | NOCHAN(  | NOCHAN(  | DOWN     |
| DOWN     | NOCHAN(  | NOCHAN(  | DOWN     | DOWN     | DOWN     | NOCHAN(  | DOWN     | DOWN     |
| NOCHAN(  | DOWN     | DOWN     | NOCHAN(  | NOCHAN(  | NOCHAN(  | DOWN     | NOCHAN(  | NOCHAN(  |
| NOCHAN(  | UP       | NOCHAN(  | NOCHAN(  | NOCHAN(  | NOCHAN(  | NOCHAN(  | UP       | NOCHAN(  |
| UP       | UP       | NOCHAN(  | UP       | NOCHAN(  | UP       | NOCHAN(  | UP       | UP       |
| DOWN     | DOWN     | NOCHAN(  | NOCHAN(  | DOWN     | NOCHAN(  | DOWN     | NOCHAN(  | DOWN     |
| NOCHAN(  | NOCHAN(  | NOCHAN(  | NOCHAN(  | NOCHAN(  | UP       | NOCHAN(  | UP       | NOCHAN(  |
| NOCHAN(  | DOWN     | NOCHAN(  | NOCHAN(  | NOCHAN(  | NOCHAN(  | NOCHAN(  | NOCHAN(  | NOCHAN(  |
| NOCHAN(  | NOCHAN(  | NOCHAN(  | NOCHAN(  | NOCHAN(  | NOCHAN(  | DOWN     | NOCHAN(  | NOCHAN(  |
| NOCHAN(  | NOCHAN(  | DOWN     | NOCHAN(  | NOCHAN(  | NOCHAN(  | NOCHAN(  | NOCHAN(  | UP       |
| UP       | NOCHAN(  | NOCHAN(  | DOWN     | NOCHAN(  | NOCHAN(  | NOCHAN(  | NOCHAN(  | UP       |
| NOCHAN(  | NOCHAN(  | NOCHAN(  | NOCHAN(  | NOCHAN(  | NOCHAN(  | UP       | DOWN     | NOCHAN(  |
| DOWN     | NOCHAN(  | NOCHAN(  | NOCHAN(  | NOCHAN(  | UP       | NOCHAN(  | UP       | DOWN     |
| UP       | NOCHAN(  | NOCHAN(  | NOCHAN(  | UP       | UP       | UP       | UP       | NOCHAN(  |
| DOWN     | DOWN     | DOWN     | NOCHAN(  | DOWN     | DOWN     | NOCHAN(  | DOWN     | DOWN     |
| DOWN     | DOWN     | DOWN     | DOWN     | NOCHAN(  | DOWN     | NOCHAN(  | DOWN     | DOWN     |
| DOWN     | DOWN     | DOWN     | NOCHAN(  | DOWN     | DOWN     | DOWN     | NOCHAN(  | DOWN     |
| NOCHAN(  | DOWN     | DOWN     | NOCHAN(  | NOCHAN(  | NOCHAN(  | DOWN     | NOCHAN(  | NOCHAN(  |
| UP       | UP       | UP       | UP       | UP       | UP       | UP       | UP       | UP       |
| NOCHAN(  | NOCHAN(  | NOCHAN(  | NOCHAN(  | NOCHAN(  | NOCHAN(  | NOCHAN(  | NOCHAN(  | NOCHAN(  |
| NOCHAN(  | NOCHAN(  | NOCHAN(  | DOWN     | NOCHAN(  | NOCHAN(  | NOCHAN(  | NOCHAN(  | DOWN     |
| NOCHAN(  | NOCHAN(  | DOWN     | NOCHAN(  | NOCHAN(  | NOCHAN(  | DOWN     | NOCHAN(  | NOCHAN(  |
| DOWN     | DOWN     | NOCHAN(  | DOWN     | NOCHAN(  | DOWN     | DOWN     | NOCHAN(  | DOWN     |
| DOWN     | DOWN     | NOCHAN(  | NOCHAN(  | NOCHAN(  | NOCHAN(  | NOCHAN(  | NOCHAN(  | NOCHAN(  |
| NOCHAN(  | UP       | NOCHAN(  | NOCHAN(  | NOCHAN(  | NOCHAN(  | UP       | UP       | NOCHAN(  |
| NOCHAN(  | DOWN     | NOCHAN(  | DOWN     | NOCHAN(  | DOWN     | NOCHAN(  | NOCHAN(  | NOCHAN(  |
| NOCHAN(  | NOCHAN(  | NOCHAN(  | NOCHAN(  | NOCHAN(  | NOCHAN(  | NOCHAN(  | NOCHAN(  | NOCHAN(  |
| DOWN     | NOCHAN(  | NOCHAN(  | DOWN     | NOCHAN(  | NOCHAN(  | NOCHAN(  | NOCHAN(  | DOWN     |
| NOCHAN(  | NOCHAN(  | UP       | NOCHAN(  | UP       | NOCHAN(  | UP       | NOCHAN(  | NOCHAN(  |
| NOCHAN(  | DOWN     | NOCHAN(  | NOCHAN(  | NOCHAN(  | NOCHAN(  | NOCHAN(  | NOCHAN(  | NOCHAN(  |
| NOCHAN(  | NOCHAN(  | UP       | NOCHAN(  | NOCHAN(  | NOCHAN(  | UP       | DOWN     | NOCHAN(  |
| NOCHAN(  | DOWN     | NOCHAN(  | NOCHAN(  | NOCHAN(  | NOCHAN(  | DOWN     | NOCHAN(  | DOWN     |
| DOWN     | DOWN     | DOWN     | DOWN     | DOWN     | DOWN     | NOCHAN(  | NOCHAN(  | DOWN     |
| UP       | DOWN     | UP       | UP       | UP       | NOCHAN(  | NOCHAN(  | UP       | NOCHAN(  |
| NOCHAN(  | UP       | UP       | UP       | UP       | UP       | UP       | NOCHAN(  | UP       |
| NOCHAN(  | NOCHAN(  | NOCHAN(  | NOCHAN(  | NOCHAN(  | UP       | NOCHAN(  | UP       | UP       |

TCGA-CZ- TCGA-B0- TCGA-BP- TCGA-CJ- TCGA-CJ- TCGA-EU- TCGA-B4- TCGA-A3- TCGA-BP-  
DOWN NOCHAN( DOWN NOCHAN( DOWN DOWN NOCHAN( DOWN NOCHAN(  
DOWN DOWN DOWN NOCHAN( DOWN NOCHAN( NOCHAN( DOWN NOCHAN(  
DOWN DOWN DOWN NOCHAN( DOWN DOWN DOWN DOWN NOCHAN(  
NOCHAN( UP NOCHAN( NOCHAN( NOCHAN( NOCHAN( NOCHAN( NOCHAN( NOCHAN( NOCHAN(  
NOCHAN( NOCHAN( NOCHAN( DOWN NOCHAN( NOCHAN( NOCHAN( NOCHAN( NOCHAN(  
DOWN DOWN DOWN DOWN NOCHAN( DOWN NOCHAN( DOWN NOCHAN(  
NOCHAN( DOWN DOWN NOCHAN( DOWN NOCHAN( DOWN NOCHAN( NOCHAN(  
NOCHAN( NOCHAN( NOCHAN( NOCHAN( NOCHAN( NOCHAN( NOCHAN( NOCHAN( NOCHAN(  
NOCHAN( UP UP UP UP NOCHAN( UP NOCHAN( DOWN  
NOCHAN( DOWN DOWN NOCHAN( DOWN NOCHAN( NOCHAN( NOCHAN( DOWN  
NOCHAN( NOCHAN( NOCHAN( NOCHAN( NOCHAN( NOCHAN( NOCHAN( NOCHAN( NOCHAN(  
NOCHAN( UP NOCHAN( UP NOCHAN( NOCHAN( NOCHAN( DOWN DOWN  
NOCHAN( NOCHAN( NOCHAN( NOCHAN( NOCHAN( NOCHAN( NOCHAN( NOCHAN( NOCHAN(  
NOCHAN( UP NOCHAN( NOCHAN( NOCHAN( NOCHAN( NOCHAN( NOCHAN( NOCHAN( NOCHAN(  
NOCHAN( NOCHAN( DOWN NOCHAN( NOCHAN( NOCHAN( NOCHAN( NOCHAN( NOCHAN( DOWN  
NOCHAN( NOCHAN( NOCHAN( NOCHAN( NOCHAN( NOCHAN( NOCHAN( NOCHAN( NOCHAN(  
NOCHAN( DOWN NOCHAN( NOCHAN( DOWN NOCHAN( NOCHAN( UP NOCHAN(  
NOCHAN( UP NOCHAN( NOCHAN( NOCHAN( NOCHAN( UP UP NOCHAN(  
DOWN DOWN DOWN DOWN DOWN DOWN NOCHAN( DOWN DOWN  
DOWN DOWN DOWN DOWN DOWN DOWN DOWN DOWN NOCHAN( DOWN  
NOCHAN( DOWN DOWN DOWN DOWN NOCHAN( DOWN DOWN DOWN  
DOWN NOCHAN( NOCHAN( NOCHAN( NOCHAN( NOCHAN( NOCHAN( NOCHAN( DOWN DOWN  
UP UP UP UP UP UP UP UP UP  
NOCHAN( DOWN DOWN NOCHAN( NOCHAN( NOCHAN( NOCHAN( NOCHAN( UP NOCHAN(  
NOCHAN( DOWN DOWN NOCHAN( NOCHAN( NOCHAN( NOCHAN( NOCHAN( NOCHAN( NOCHAN(  
NOCHAN( NOCHAN( DOWN NOCHAN( NOCHAN( NOCHAN( NOCHAN( NOCHAN( NOCHAN( DOWN  
DOWN DOWN DOWN DOWN DOWN DOWN NOCHAN( NOCHAN( DOWN  
NOCHAN( DOWN DOWN NOCHAN( DOWN NOCHAN( NOCHAN( DOWN NOCHAN(  
NOCHAN( NOCHAN( NOCHAN( NOCHAN( NOCHAN( NOCHAN( NOCHAN( NOCHAN( NOCHAN(  
NOCHAN( NOCHAN( DOWN NOCHAN( NOCHAN( NOCHAN( NOCHAN( NOCHAN( DOWN NOCHAN(  
NOCHAN( UP UP NOCHAN( UP UP NOCHAN( DOWN DOWN  
NOCHAN( DOWN DOWN NOCHAN( DOWN NOCHAN( NOCHAN( NOCHAN( NOCHAN( NOCHAN(  
NOCHAN( NOCHAN( NOCHAN( NOCHAN( NOCHAN( UP NOCHAN( NOCHAN( UP UP  
NOCHAN( UP NOCHAN( NOCHAN( NOCHAN( NOCHAN( NOCHAN( NOCHAN( NOCHAN( NOCHAN(  
DOWN UP NOCHAN( UP UP UP UP DOWN NOCHAN(  
DOWN NOCHAN( DOWN NOCHAN( DOWN NOCHAN( NOCHAN( NOCHAN( NOCHAN( NOCHAN(  
DOWN DOWN DOWN NOCHAN( DOWN NOCHAN( DOWN DOWN DOWN  
NOCHAN( UP NOCHAN( UP NOCHAN( NOCHAN( NOCHAN( NOCHAN( UP  
UP DOWN DOWN NOCHAN( NOCHAN( UP NOCHAN( UP UP  
UP NOCHAN( NOCHAN( NOCHAN( NOCHAN( NOCHAN( NOCHAN( NOCHAN( UP NOCHAN(

[illegible]

TCGA-B8- TCGA-BP- TCGA-B8- TCGA-B4- TCGA-CZ- TCGA-BP- TCGA-A3- TCGA-B8- TCGA-BP-  
DOWN NOCHAN( NOCHAN( NOCHAN( NOCHAN( NOCHAN( DOWN DOWN DOWN DOWN  
NOCHAN( DOWN NOCHAN( NOCHAN( DOWN NOCHAN( NOCHAN( NOCHAN( DOWN  
DOWN DOWN NOCHAN( DOWN DOWN DOWN DOWN DOWN DOWN DOWN  
NOCHAN( UP NOCHAN( NOCHAN( UP NOCHAN( NOCHAN( NOCHAN( NOCHAN(  
NOCHAN( NOCHAN( NOCHAN( NOCHAN( NOCHAN( NOCHAN( NOCHAN( NOCHAN( DOWN  
DOWN DOWN NOCHAN( NOCHAN( DOWN NOCHAN( DOWN NOCHAN( DOWN  
NOCHAN( NOCHAN( UP NOCHAN( DOWN NOCHAN( NOCHAN( DOWN NOCHAN(  
NOCHAN( DOWN UP NOCHAN( NOCHAN( NOCHAN( NOCHAN( NOCHAN( NOCHAN(  
UP UP UP NOCHAN( UP NOCHAN( NOCHAN( NOCHAN( NOCHAN(  
NOCHAN( DOWN NOCHAN( NOCHAN( NOCHAN( NOCHAN( DOWN NOCHAN( DOWN  
NOCHAN( NOCHAN( NOCHAN( NOCHAN( NOCHAN( NOCHAN( UP NOCHAN( NOCHAN(  
NOCHAN( NOCHAN( NOCHAN( NOCHAN( NOCHAN( DOWN DOWN UP NOCHAN(  
NOCHAN( NOCHAN( NOCHAN( NOCHAN( NOCHAN( NOCHAN( NOCHAN( NOCHAN( NOCHAN(  
NOCHAN( NOCHAN( UP NOCHAN( UP DOWN NOCHAN( UP UP  
UP NOCHAN( NOCHAN( NOCHAN( NOCHAN( NOCHAN( NOCHAN( NOCHAN( NOCHAN( DOWN  
NOCHAN( UP NOCHAN( NOCHAN( NOCHAN( NOCHAN( NOCHAN( NOCHAN( DOWN UP  
DOWN UP NOCHAN( NOCHAN( DOWN UP NOCHAN( UP DOWN  
NOCHAN( NOCHAN( UP UP NOCHAN( UP UP UP NOCHAN(  
DOWN DOWN DOWN DOWN NOCHAN( NOCHAN( DOWN NOCHAN( DOWN  
DOWN DOWN NOCHAN( NOCHAN( DOWN NOCHAN( DOWN DOWN DOWN  
DOWN DOWN UP NOCHAN( DOWN NOCHAN( DOWN NOCHAN( DOWN  
NOCHAN( NOCHAN( NOCHAN( DOWN NOCHAN( DOWN DOWN NOCHAN( NOCHAN(  
UP UP UP UP UP UP UP UP UP  
DOWN DOWN DOWN NOCHAN( DOWN NOCHAN( NOCHAN( NOCHAN( DOWN  
NOCHAN( NOCHAN( NOCHAN( NOCHAN( NOCHAN( NOCHAN( NOCHAN( NOCHAN( DOWN  
DOWN NOCHAN( NOCHAN( NOCHAN( NOCHAN( NOCHAN( NOCHAN( NOCHAN( NOCHAN( DOWN  
NOCHAN( DOWN NOCHAN( NOCHAN( DOWN NOCHAN( DOWN NOCHAN( DOWN  
NOCHAN( NOCHAN( UP NOCHAN( NOCHAN( NOCHAN( NOCHAN( NOCHAN( NOCHAN(  
NOCHAN( NOCHAN( NOCHAN( NOCHAN( NOCHAN( NOCHAN( NOCHAN( NOCHAN( NOCHAN(  
NOCHAN( NOCHAN( UP NOCHAN( NOCHAN( NOCHAN( NOCHAN( NOCHAN( NOCHAN(  
NOCHAN( NOCHAN( UP NOCHAN( UP DOWN NOCHAN( NOCHAN( NOCHAN(  
NOCHAN( DOWN DOWN NOCHAN( DOWN NOCHAN( NOCHAN( DOWN DOWN  
NOCHAN( NOCHAN( NOCHAN( UP NOCHAN( UP NOCHAN( NOCHAN( DOWN NOCHAN(  
NOCHAN( NOCHAN( NOCHAN( NOCHAN( NOCHAN( UP NOCHAN( UP NOCHAN(  
NOCHAN( DOWN UP NOCHAN( NOCHAN( UP UP DOWN UP  
NOCHAN( UP NOCHAN( NOCHAN( NOCHAN( UP NOCHAN( DOWN NOCHAN(

| TCGA-A3- | TCGA-B0- | TCGA-CZ- | TCGA-BP- | TCGA-BP- | TCGA-CJ- | TCGA-B0- | TCGA-CZ- | TCGA-B0- |
|----------|----------|----------|----------|----------|----------|----------|----------|----------|
| NOCHANC  | DOWN     | NOCHANC  | NOCHANC  | DOWN     | DOWN     | DOWN     | DOWN     | DOWN     |
| DOWN     | NOCHANC  | DOWN     | DOWN     | DOWN     | NOCHANC  | DOWN     | DOWN     | DOWN     |
| DOWN     | DOWN     | DOWN     | NOCHANC  | DOWN     | NOCHANC  | DOWN     | NOCHANC  | DOWN     |
| UP       | NOCHANC  | NOCHANC  | NOCHANC  | NOCHANC  | NOCHANC  | UP       | NOCHANC  | UP       |
| NOCHANC  | NOCHANC  | NOCHANC  | UP       | NOCHANC  | NOCHANC  | UP       | DOWN     | UP       |
| DOWN     | NOCHANC  | DOWN     | NOCHANC  | DOWN     | NOCHANC  | DOWN     | DOWN     | DOWN     |
| DOWN     | NOCHANC  | NOCHANC  | NOCHANC  | NOCHANC  | NOCHANC  | DOWN     | NOCHANC  | NOCHANC  |
| NOCHANC  | NOCHANC  | NOCHANC  | NOCHANC  | NOCHANC  | NOCHANC  | NOCHANC  | UP       | NOCHANC  |
| UP       | NOCHANC  | UP       | UP       | UP       | NOCHANC  | UP       | NOCHANC  | UP       |
| NOCHANC  | NOCHANC  | NOCHANC  | DOWN     | NOCHANC  | NOCHANC  | DOWN     | DOWN     | DOWN     |
| NOCHANC  | NOCHANC  | NOCHANC  | NOCHANC  | NOCHANC  | NOCHANC  | UP       | NOCHANC  | UP       |
| NOCHANC  | NOCHANC  | NOCHANC  | NOCHANC  | NOCHANC  | DOWN     | NOCHANC  | NOCHANC  | NOCHANC  |
| NOCHANC  | NOCHANC  | NOCHANC  | NOCHANC  | NOCHANC  | NOCHANC  | NOCHANC  | NOCHANC  | NOCHANC  |
| UP       | NOCHANC  | UP       | NOCHANC  | UP       | NOCHANC  | UP       | UP       | UP       |
| NOCHANC  | NOCHANC  | DOWN     | NOCHANC  | DOWN     | NOCHANC  | NOCHANC  | NOCHANC  | DOWN     |
| NOCHANC  | NOCHANC  | NOCHANC  | NOCHANC  | NOCHANC  | NOCHANC  | UP       | UP       | UP       |
| NOCHANC  | NOCHANC  | NOCHANC  | UP       | DOWN     | NOCHANC  | NOCHANC  | DOWN     | UP       |
| NOCHANC  | UP       | UP       | NOCHANC  | NOCHANC  | NOCHANC  | NOCHANC  | NOCHANC  | NOCHANC  |
| DOWN     | DOWN     | NOCHANC  | NOCHANC  | NOCHANC  | NOCHANC  | DOWN     | DOWN     | DOWN     |
| DOWN     | DOWN     | DOWN     | NOCHANC  | DOWN     | DOWN     | DOWN     | DOWN     | NOCHANC  |
| DOWN     | DOWN     | NOCHANC  | UP       | DOWN     | NOCHANC  | DOWN     | DOWN     | DOWN     |
| NOCHANC  | NOCHANC  | NOCHANC  | NOCHANC  | NOCHANC  | NOCHANC  | NOCHANC  | DOWN     | NOCHANC  |
| UP       | UP       | UP       | NOCHANC  | UP       | UP       | UP       | UP       | UP       |
| DOWN     | NOCHANC  | NOCHANC  | NOCHANC  | NOCHANC  | NOCHANC  | DOWN     | DOWN     | NOCHANC  |
| NOCHANC  | NOCHANC  | NOCHANC  | NOCHANC  | DOWN     | NOCHANC  | DOWN     | NOCHANC  | UP       |
| NOCHANC  | NOCHANC  | NOCHANC  | NOCHANC  | NOCHANC  | NOCHANC  | NOCHANC  | DOWN     | NOCHANC  |
| DOWN     | DOWN     | DOWN     | DOWN     | DOWN     | DOWN     | DOWN     | DOWN     | DOWN     |
| NOCHANC  | NOCHANC  | NOCHANC  | NOCHANC  | NOCHANC  | NOCHANC  | DOWN     | NOCHANC  | DOWN     |
| NOCHANC  | NOCHANC  | NOCHANC  | NOCHANC  | NOCHANC  | NOCHANC  | NOCHANC  | NOCHANC  | UP       |
| DOWN     | DOWN     | DOWN     | NOCHANC  | NOCHANC  | DOWN     | NOCHANC  | UP       | NOCHANC  |
| NOCHANC  | NOCHANC  | NOCHANC  | NOCHANC  | UP       | DOWN     | UP       | DOWN     | UP       |
| DOWN     | NOCHANC  | NOCHANC  | NOCHANC  | DOWN     | UP       | NOCHANC  | NOCHANC  | DOWN     |
| NOCHANC  | UP       | NOCHANC  | UP       | NOCHANC  | UP       | NOCHANC  | UP       | UP       |
| NOCHANC  | NOCHANC  | NOCHANC  | DOWN     | NOCHANC  | NOCHANC  | NOCHANC  | NOCHANC  | NOCHANC  |
| UP       | NOCHANC  | NOCHANC  | UP       | NOCHANC  | UP       | UP       | UP       | NOCHANC  |
| NOCHANC  | NOCHANC  | NOCHANC  | NOCHANC  | NOCHANC  | NOCHANC  | DOWN     | NOCHANC  | NOCHANC  |
| DOWN     | NOCHANC  | DOWN     | DOWN     | DOWN     | DOWN     | DOWN     | DOWN     | DOWN     |
| NOCHANC  | UP       | UP       | NOCHANC  | UP       | UP       | NOCHANC  | UP       | NOCHANC  |
| UP       | UP       | UP       | UP       | NOCHANC  | UP       | NOCHANC  | UP       | DOWN     |
| UP       | NOCHANC  | NOCHANC  | UP       | NOCHANC  | UP       | UP       | NOCHANC  | NOCHANC  |

TCGA-B8- TCGA-CJ- TCGA-CJ- TCGA-BP- TCGA-B0- TCGA-BP- TCGA-BP- TCGA-BP- TCGA-B2-  
NOCHAN( NOCHAN( DOWN DOWN NOCHAN( NOCHAN( DOWN NOCHAN( DOWN  
NOCHAN( DOWN DOWN DOWN DOWN NOCHAN( DOWN DOWN DOWN  
UP DOWN DOWN DOWN DOWN NOCHAN( DOWN DOWN NOCHAN(  
NOCHAN( UP NOCHAN( NOCHAN( NOCHAN( NOCHAN( NOCHAN( UP NOCHAN( NOCHAN(  
NOCHAN( NOCHAN( NOCHAN( NOCHAN( NOCHAN( NOCHAN( NOCHAN( NOCHAN( DOWN  
NOCHAN( DOWN DOWN DOWN DOWN NOCHAN( DOWN DOWN NOCHAN(  
UP NOCHAN( DOWN DOWN DOWN DOWN DOWN DOWN NOCHAN( DOWN  
UP NOCHAN( NOCHAN( NOCHAN( NOCHAN( NOCHAN( NOCHAN( NOCHAN( NOCHAN( NOCHAN(  
NOCHAN( UP NOCHAN( NOCHAN( UP NOCHAN( UP NOCHAN( DOWN  
DOWN NOCHAN( DOWN NOCHAN( NOCHAN( NOCHAN( DOWN NOCHAN( UP  
NOCHAN( UP UP NOCHAN( NOCHAN( NOCHAN( NOCHAN( NOCHAN( NOCHAN(  
NOCHAN( NOCHAN( NOCHAN( NOCHAN( NOCHAN( NOCHAN( NOCHAN( NOCHAN( NOCHAN(  
NOCHAN( NOCHAN( NOCHAN( NOCHAN( NOCHAN( NOCHAN( NOCHAN( NOCHAN( NOCHAN(  
NOCHAN( NOCHAN( NOCHAN( NOCHAN( UP NOCHAN( NOCHAN( NOCHAN( DOWN  
NOCHAN( NOCHAN( NOCHAN( DOWN NOCHAN( NOCHAN( NOCHAN( NOCHAN( DOWN  
NOCHAN( NOCHAN( NOCHAN( NOCHAN( UP NOCHAN( NOCHAN( NOCHAN( NOCHAN(  
UP UP UP NOCHAN( NOCHAN( NOCHAN( UP UP NOCHAN(  
DOWN NOCHAN( NOCHAN( NOCHAN( NOCHAN( NOCHAN( UP UP NOCHAN( UP  
NOCHAN( NOCHAN( DOWN DOWN NOCHAN( NOCHAN( DOWN DOWN NOCHAN(  
NOCHAN( DOWN DOWN NOCHAN( NOCHAN( DOWN DOWN DOWN NOCHAN(  
DOWN NOCHAN( DOWN NOCHAN( DOWN NOCHAN( DOWN DOWN NOCHAN(  
DOWN NOCHAN( NOCHAN( NOCHAN( NOCHAN( NOCHAN( NOCHAN( NOCHAN( DOWN  
DOWN UP UP UP UP NOCHAN( UP UP NOCHAN(  
NOCHAN( NOCHAN( DOWN NOCHAN( DOWN NOCHAN( NOCHAN( NOCHAN( NOCHAN(  
NOCHAN( NOCHAN( NOCHAN( NOCHAN( NOCHAN( NOCHAN( NOCHAN( NOCHAN( NOCHAN( UP  
NOCHAN( NOCHAN( NOCHAN( NOCHAN( NOCHAN( NOCHAN( NOCHAN( NOCHAN( NOCHAN( DOWN  
NOCHAN( DOWN DOWN DOWN DOWN DOWN DOWN DOWN NOCHAN(  
NOCHAN( NOCHAN( NOCHAN( NOCHAN( NOCHAN( NOCHAN( DOWN NOCHAN( NOCHAN(  
NOCHAN( NOCHAN( NOCHAN( NOCHAN( DOWN NOCHAN( UP NOCHAN( NOCHAN(  
UP DOWN DOWN DOWN NOCHAN( DOWN NOCHAN( NOCHAN( DOWN  
DOWN NOCHAN( NOCHAN( DOWN UP NOCHAN( NOCHAN( NOCHAN( NOCHAN(  
NOCHAN( NOCHAN( DOWN NOCHAN( NOCHAN( NOCHAN( NOCHAN( NOCHAN( UP  
NOCHAN( NOCHAN( NOCHAN( UP NOCHAN( UP NOCHAN( NOCHAN( UP  
NOCHAN( NOCHAN( NOCHAN( NOCHAN( NOCHAN( NOCHAN( NOCHAN( NOCHAN( NOCHAN(  
DOWN UP NOCHAN( NOCHAN( UP NOCHAN( NOCHAN( DOWN NOCHAN(  
UP NOCHAN( NOCHAN( NOCHAN( NOCHAN( NOCHAN( NOCHAN( DOWN NOCHAN( NOCHAN(  
NOCHAN( DOWN DOWN DOWN DOWN DOWN DOWN DOWN NOCHAN(  
NOCHAN( UP NOCHAN( UP UP NOCHAN( NOCHAN( UP NOCHAN(  
UP NOCHAN( NOCHAN( UP NOCHAN( UP NOCHAN( UP UP  
UP UP NOCHAN( NOCHAN( NOCHAN( NOCHAN( UP UP DOWN



| TCGA-B0- | TCGA-G6- | TCGA-B0- | TCGA-A3- | TCGA-BP- | TCGA-BP- | TCGA-CJ- | TCGA-DV | TCGA-BP- |
|----------|----------|----------|----------|----------|----------|----------|---------|----------|
| DOWN     | DOWN     | NOCHAN   | NOCHAN   | NOCHAN   | DOWN     | DOWN     | NOCHAN  | DOWN     |
| DOWN     | DOWN     | DOWN     | DOWN     | DOWN     | DOWN     | NOCHAN   | DOWN    | NOCHAN   |
| DOWN     | DOWN     | DOWN     | DOWN     | DOWN     | DOWN     | DOWN     | DOWN    | DOWN     |
| UP       | UP       | NOCHAN   | NOCHAN   | NOCHAN   | NOCHAN   | NOCHAN   | UP      | NOCHAN   |
| NOCHAN   | NOCHAN   | NOCHAN   | NOCHAN   | NOCHAN   | UP       | NOCHAN   | NOCHAN  | NOCHAN   |
| DOWN     | DOWN     | DOWN     | DOWN     | NOCHAN   | DOWN     | DOWN     | NOCHAN  | NOCHAN   |
| DOWN     | DOWN     | DOWN     | NOCHAN   | DOWN     | UP       | DOWN     | NOCHAN  | NOCHAN   |
| UP       | NOCHAN   | NOCHAN   | NOCHAN   | NOCHAN   | NOCHAN   | NOCHAN   | DOWN    | NOCHAN   |
| UP       | UP       | UP       | UP       | UP       | UP       | NOCHAN   | NOCHAN  | UP       |
| DOWN     | DOWN     | DOWN     | NOCHAN   | DOWN     | DOWN     | DOWN     | DOWN    | NOCHAN   |
| NOCHAN   | NOCHAN   | UP       | UP       | NOCHAN   | UP       | NOCHAN   | NOCHAN  | NOCHAN   |
| NOCHAN   | NOCHAN   | NOCHAN   | NOCHAN   | NOCHAN   | DOWN     | NOCHAN   | DOWN    | NOCHAN   |
| NOCHAN   | NOCHAN   | NOCHAN   | NOCHAN   | NOCHAN   | DOWN     | NOCHAN   | DOWN    | NOCHAN   |
| UP       | UP       | NOCHAN   | NOCHAN   | NOCHAN   | UP       | NOCHAN   | DOWN    | UP       |
| NOCHAN   | DOWN     | NOCHAN   | DOWN     | NOCHAN   | UP       | DOWN     | NOCHAN  | NOCHAN   |
| NOCHAN   | NOCHAN   | NOCHAN   | NOCHAN   | UP       | UP       | UP       | NOCHAN  | UP       |
| NOCHAN   | DOWN     | UP       | NOCHAN   | NOCHAN   | NOCHAN   | NOCHAN   | NOCHAN  | NOCHAN   |
| NOCHAN   | NOCHAN   | NOCHAN   | NOCHAN   | NOCHAN   | NOCHAN   | UP       | NOCHAN  | NOCHAN   |
| DOWN     | DOWN     | DOWN     | DOWN     | NOCHAN   | DOWN     | DOWN     | DOWN    | DOWN     |
| DOWN     | DOWN     | DOWN     | NOCHAN   | DOWN     | DOWN     | NOCHAN   | NOCHAN  | DOWN     |
| DOWN     | DOWN     | DOWN     | DOWN     | DOWN     | DOWN     | DOWN     | DOWN    | NOCHAN   |
| NOCHAN   | NOCHAN   | NOCHAN   | NOCHAN   | NOCHAN   | NOCHAN   | DOWN     | NOCHAN  | NOCHAN   |
| UP       | UP       | UP       | UP       | UP       | UP       | UP       | UP      | UP       |
| DOWN     | DOWN     | DOWN     | NOCHAN   | DOWN     | NOCHAN   | NOCHAN   | NOCHAN  | DOWN     |
| DOWN     | DOWN     | DOWN     | NOCHAN   | DOWN     | NOCHAN   | NOCHAN   | NOCHAN  | NOCHAN   |
| NOCHAN   | DOWN     | NOCHAN   | NOCHAN   | NOCHAN   | NOCHAN   | DOWN     | NOCHAN  | NOCHAN   |
| DOWN     | DOWN     | DOWN     | NOCHAN   | DOWN     | DOWN     | DOWN     | DOWN    | DOWN     |
| NOCHAN   | DOWN     | DOWN     | NOCHAN   | NOCHAN   | DOWN     | NOCHAN   | DOWN    | NOCHAN   |
| NOCHAN   | NOCHAN   | NOCHAN   | NOCHAN   | UP       | NOCHAN   | NOCHAN   | UP      | NOCHAN   |
| NOCHAN   | DOWN     | DOWN     | NOCHAN   | NOCHAN   | UP       | NOCHAN   | NOCHAN  | NOCHAN   |
| UP       | UP       | NOCHAN   | NOCHAN   | NOCHAN   | UP       | NOCHAN   | NOCHAN  | NOCHAN   |
| DOWN     | DOWN     | DOWN     | NOCHAN   | NOCHAN   | DOWN     | NOCHAN   | DOWN    | NOCHAN   |
| NOCHAN   | NOCHAN   | NOCHAN   | UP       | NOCHAN   | NOCHAN   | NOCHAN   | UP      | NOCHAN   |
| NOCHAN   | UP       | NOCHAN   | NOCHAN   | NOCHAN   | NOCHAN   | NOCHAN   | NOCHAN  | NOCHAN   |
| UP       | NOCHAN   | NOCHAN   | NOCHAN   | UP       | UP       | UP       | UP      | UP       |
| DOWN     | NOCHAN   | NOCHAN   | NOCHAN   | NOCHAN   | DOWN     | DOWN     | DOWN    | NOCHAN   |
| DOWN     | DOWN     | DOWN     | NOCHAN   | DOWN     | DOWN     | DOWN     | DOWN    | DOWN     |
| NOCHAN   | NOCHAN   | NOCHAN   | UP       | NOCHAN   | NOCHAN   | NOCHAN   | NOCHAN  | NOCHAN   |
| DOWN     | DOWN     | NOCHAN   | UP       | NOCHAN   | DOWN     | NOCHAN   | NOCHAN  | UP       |
| NOCHAN   | NOCHAN   | UP       | NOCHAN   | NOCHAN   | UP       | NOCHAN   | NOCHAN  | NOCHAN   |

| TCGA-BP- | TCGA-B0- | TCGA-B0- | TCGA-BP- | TCGA-B0- | TCGA-B0- | TCGA-B0- | TCGA-AK- | TCGA-B8- |
|----------|----------|----------|----------|----------|----------|----------|----------|----------|
| DOWN     | NOCHAN(  | NOCHAN(  | DOWN     | NOCHAN(  | NOCHAN(  | NOCHAN(  | UP       | DOWN     |
| DOWN     | NOCHAN(  | NOCHAN(  | NOCHAN(  | DOWN     | NOCHAN(  | DOWN     | DOWN     | NOCHAN(  |
| DOWN     | DOWN     | NOCHAN(  | DOWN     | NOCHAN(  | DOWN     | DOWN     | DOWN     | NOCHAN(  |
| NOCHAN(  | UP       | NOCHAN(  | UP       | NOCHAN(  | NOCHAN(  | NOCHAN(  | DOWN     | NOCHAN(  |
| NOCHAN(  | NOCHAN(  | NOCHAN(  | UP       | NOCHAN(  | NOCHAN(  | DOWN     | DOWN     | NOCHAN(  |
| DOWN     | NOCHAN(  | NOCHAN(  | NOCHAN(  | NOCHAN(  | NOCHAN(  | DOWN     | UP       | DOWN     |
| DOWN     | UP       | UP       | NOCHAN(  | NOCHAN(  | DOWN     | DOWN     | UP       | DOWN     |
| NOCHAN(  | NOCHAN(  | UP       | NOCHAN(  | NOCHAN(  | NOCHAN(  | UP       | DOWN     | UP       |
| NOCHAN(  | NOCHAN(  | NOCHAN(  | NOCHAN(  | UP       | UP       | UP       | DOWN     | UP       |
| DOWN     | DOWN     | DOWN     | DOWN     | NOCHAN(  | NOCHAN(  | DOWN     | DOWN     | DOWN     |
| NOCHAN(  | NOCHAN(  | NOCHAN(  | UP       | UP       | NOCHAN(  | NOCHAN(  | NOCHAN(  | NOCHAN(  |
| NOCHAN(  | NOCHAN(  | NOCHAN(  | NOCHAN(  | NOCHAN(  | NOCHAN(  | UP       | UP       | NOCHAN(  |
| DOWN     | DOWN     | NOCHAN(  | DOWN     | NOCHAN(  | NOCHAN(  | NOCHAN(  | DOWN     | NOCHAN(  |
| NOCHAN(  | NOCHAN(  | NOCHAN(  | NOCHAN(  | NOCHAN(  | NOCHAN(  | UP       | UP       | NOCHAN(  |
| DOWN     | UP       | NOCHAN(  | NOCHAN(  | UP       | NOCHAN(  | NOCHAN(  | DOWN     | UP       |
| NOCHAN(  | NOCHAN(  | NOCHAN(  | NOCHAN(  | NOCHAN(  | NOCHAN(  | NOCHAN(  | UP       | NOCHAN(  |
| NOCHAN(  | NOCHAN(  | UP       | NOCHAN(  | NOCHAN(  | UP       | DOWN     | DOWN     | DOWN     |
| NOCHAN(  | NOCHAN(  | DOWN     | NOCHAN(  | NOCHAN(  | NOCHAN(  | NOCHAN(  | DOWN     | UP       |
| DOWN     | NOCHAN(  | NOCHAN(  | DOWN     | DOWN     | NOCHAN(  | DOWN     | UP       | DOWN     |
| DOWN     | UP       | NOCHAN(  | DOWN     | NOCHAN(  | NOCHAN(  | DOWN     | NOCHAN(  | DOWN     |
| DOWN     | UP       | UP       | NOCHAN(  | NOCHAN(  | DOWN     | DOWN     | NOCHAN(  | DOWN     |
| NOCHAN(  | DOWN     | DOWN     | DOWN     | NOCHAN(  | NOCHAN(  | NOCHAN(  | NOCHAN(  | NOCHAN(  |
| UP       | UP       | DOWN     | NOCHAN(  | UP       | NOCHAN(  | UP       | DOWN     | UP       |
| DOWN     | NOCHAN(  | DOWN     | NOCHAN(  | NOCHAN(  | NOCHAN(  | DOWN     | NOCHAN(  | DOWN     |
| DOWN     | UP       | NOCHAN(  | NOCHAN(  | NOCHAN(  | NOCHAN(  | DOWN     | DOWN     | NOCHAN(  |
| NOCHAN(  | NOCHAN(  | DOWN     | NOCHAN(  | NOCHAN(  | NOCHAN(  | NOCHAN(  | NOCHAN(  | NOCHAN(  |
| DOWN     | NOCHAN(  | NOCHAN(  | NOCHAN(  | NOCHAN(  | DOWN     | DOWN     | DOWN     | NOCHAN(  |
| NOCHAN(  | UP       | NOCHAN(  | NOCHAN(  | NOCHAN(  | NOCHAN(  | DOWN     | UP       | NOCHAN(  |
| NOCHAN(  | UP       | NOCHAN(  | UP       | NOCHAN(  | UP       | NOCHAN(  | NOCHAN(  | UP       |
| NOCHAN(  | NOCHAN(  | NOCHAN(  | NOCHAN(  | NOCHAN(  | NOCHAN(  | DOWN     | UP       | NOCHAN(  |
| NOCHAN(  | NOCHAN(  | DOWN     | DOWN     | DOWN     | NOCHAN(  | UP       | UP       | UP       |
| DOWN     | NOCHAN(  | NOCHAN(  | NOCHAN(  | NOCHAN(  | NOCHAN(  | DOWN     | DOWN     | DOWN     |
| NOCHAN(  | NOCHAN(  | NOCHAN(  | UP       | UP       | UP       | DOWN     | DOWN     | UP       |
| NOCHAN(  | NOCHAN(  | DOWN     | NOCHAN(  | NOCHAN(  | NOCHAN(  | UP       | UP       | NOCHAN(  |
| DOWN     | UP       | NOCHAN(  | NOCHAN(  | UP       | UP       | DOWN     | DOWN     | UP       |
| DOWN     | NOCHAN(  | UP       | DOWN     | NOCHAN(  | NOCHAN(  | DOWN     | NOCHAN(  | DOWN     |
| DOWN     | NOCHAN(  | NOCHAN(  | DOWN     | DOWN     | NOCHAN(  | DOWN     | NOCHAN(  | DOWN     |
| NOCHAN(  | NOCHAN(  | NOCHAN(  | NOCHAN(  | UP       | NOCHAN(  | NOCHAN(  | DOWN     | UP       |
| NOCHAN(  | NOCHAN(  | UP       | UP       | NOCHAN(  | NOCHAN(  | DOWN     | DOWN     | NOCHAN(  |
| NOCHAN(  | UP       | NOCHAN(  | UP       | UP       | NOCHAN(  | DOWN     | DOWN     | NOCHAN(  |

| TCGA-A3- | TCGA-B0- | TCGA-A3- | TCGA-B0- | TCGA-BP- | TCGA-B8- | TCGA-B8- | TCGA-CJ- | TCGA-CW |
|----------|----------|----------|----------|----------|----------|----------|----------|---------|
| DOWN     | NOCHAN(  | DOWN     | DOWN     | DOWN     | NOCHAN(  | DOWN     | DOWN     | DOWN    |
| NOCHAN(  | NOCHAN(  | DOWN     | DOWN     | NOCHAN(  | DOWN     | DOWN     | NOCHAN(  | NOCHAN( |
| DOWN     | NOCHAN(  | DOWN     | DOWN     | DOWN     | DOWN     | DOWN     | NOCHAN(  | DOWN    |
| NOCHAN(  | NOCHAN(  | NOCHAN(  | NOCHAN(  | NOCHAN(  | NOCHAN(  | NOCHAN(  | NOCHAN(  | NOCHAN( |
| NOCHAN(  | NOCHAN(  | NOCHAN(  | NOCHAN(  | NOCHAN(  | NOCHAN(  | DOWN     | NOCHAN(  | NOCHAN( |
| DOWN     | NOCHAN(  | DOWN     | DOWN     | DOWN     | NOCHAN(  | DOWN     | NOCHAN(  | DOWN    |
| NOCHAN(  | DOWN     | NOCHAN(  | NOCHAN(  | DOWN     | NOCHAN(  | DOWN     | NOCHAN(  | NOCHAN( |
| NOCHAN(  | NOCHAN(  | UP       | NOCHAN(  | NOCHAN(  | DOWN     | NOCHAN(  | NOCHAN(  | UP      |
| UP       | NOCHAN(  | UP       | NOCHAN(  | NOCHAN(  | NOCHAN(  | UP       | UP       | UP      |
| DOWN     | NOCHAN(  | DOWN     | NOCHAN(  | DOWN     | NOCHAN(  | DOWN     | DOWN     | NOCHAN( |
| UP       | NOCHAN(  | NOCHAN(  | UP       | NOCHAN(  | NOCHAN(  | UP       | NOCHAN(  | NOCHAN( |
| NOCHAN(  | NOCHAN(  | NOCHAN(  | NOCHAN(  | NOCHAN(  | UP       | NOCHAN(  | NOCHAN(  | NOCHAN( |
| NOCHAN(  | NOCHAN(  | NOCHAN(  | DOWN     | NOCHAN(  | NOCHAN(  | NOCHAN(  | NOCHAN(  | NOCHAN( |
| NOCHAN(  | NOCHAN(  | UP       | NOCHAN(  | NOCHAN(  | NOCHAN(  | NOCHAN(  | NOCHAN(  | UP      |
| NOCHAN(  | NOCHAN(  | NOCHAN(  | DOWN     | NOCHAN(  | DOWN     | NOCHAN(  | NOCHAN(  | UP      |
| NOCHAN(  | NOCHAN(  | NOCHAN(  | UP       | UP       | UP       | NOCHAN(  | NOCHAN(  | NOCHAN( |
| UP       | NOCHAN(  | DOWN     | NOCHAN(  | NOCHAN(  | NOCHAN(  | NOCHAN(  | DOWN     | NOCHAN( |
| UP       | NOCHAN(  | UP       | UP       | NOCHAN(  | NOCHAN(  | NOCHAN(  | NOCHAN(  | NOCHAN( |
| DOWN     | NOCHAN(  | DOWN     | DOWN     | DOWN     | UP       | DOWN     | NOCHAN(  | DOWN    |
| NOCHAN(  | DOWN     | NOCHAN(  | DOWN     | DOWN     | NOCHAN(  | DOWN     | NOCHAN(  | DOWN    |
| DOWN     | NOCHAN(  | DOWN     | DOWN     | DOWN     | NOCHAN(  | DOWN     | DOWN     | DOWN    |
| NOCHAN(  | NOCHAN(  | NOCHAN(  | NOCHAN(  | NOCHAN(  | NOCHAN(  | NOCHAN(  | NOCHAN(  | NOCHAN( |
| UP       | UP       | UP       | UP       | UP       | UP       | UP       | UP       | UP      |
| NOCHAN(  | NOCHAN(  | NOCHAN(  | NOCHAN(  | DOWN     | NOCHAN(  | DOWN     | NOCHAN(  | NOCHAN( |
| NOCHAN(  | NOCHAN(  | NOCHAN(  | NOCHAN(  | DOWN     | NOCHAN(  | DOWN     | NOCHAN(  | NOCHAN( |
| NOCHAN(  | NOCHAN(  | NOCHAN(  | NOCHAN(  | DOWN     | NOCHAN(  | DOWN     | DOWN     | NOCHAN( |
| NOCHAN(  | DOWN     | DOWN     | DOWN     | DOWN     | DOWN     | DOWN     | DOWN     | NOCHAN( |
| NOCHAN(  | NOCHAN(  | NOCHAN(  | NOCHAN(  | NOCHAN(  | UP       | DOWN     | NOCHAN(  | NOCHAN( |
| NOCHAN(  | UP       | UP       | UP       | NOCHAN(  | NOCHAN(  | NOCHAN(  | NOCHAN(  | NOCHAN( |
| DOWN     | DOWN     | NOCHAN(  | DOWN     | NOCHAN(  | NOCHAN(  | NOCHAN(  | NOCHAN(  | NOCHAN( |
| NOCHAN(  | NOCHAN(  | UP       | NOCHAN(  | NOCHAN(  | UP       | UP       | NOCHAN(  | NOCHAN( |
| NOCHAN(  | NOCHAN(  | DOWN     | NOCHAN(  | DOWN     | NOCHAN(  | DOWN     | NOCHAN(  | NOCHAN( |
| NOCHAN(  | UP       | NOCHAN(  | NOCHAN(  | NOCHAN(  | NOCHAN(  | NOCHAN(  | UP       | NOCHAN( |
| NOCHAN(  | NOCHAN(  | UP       | NOCHAN(  | NOCHAN(  | UP       | NOCHAN(  | NOCHAN(  | NOCHAN( |
| NOCHAN(  | NOCHAN(  | NOCHAN(  | NOCHAN(  | NOCHAN(  | NOCHAN(  | UP       | NOCHAN(  | NOCHAN( |
| NOCHAN(  | NOCHAN(  | DOWN     | NOCHAN(  | DOWN     | NOCHAN(  | NOCHAN(  | NOCHAN(  | NOCHAN( |
| DOWN     | DOWN     | DOWN     | DOWN     | DOWN     | DOWN     | DOWN     | DOWN     | DOWN    |
| NOCHAN(  | UP       | NOCHAN(  | NOCHAN(  | NOCHAN(  | UP       | NOCHAN(  | UP       | UP      |
| UP       | UP       | DOWN     | UP       | NOCHAN(  | NOCHAN(  | NOCHAN(  | NOCHAN(  | NOCHAN( |
| UP       | UP       | NOCHAN(  | NOCHAN(  | NOCHAN(  | DOWN     | NOCHAN(  | DOWN     | UP      |

| TCGA-B0-NOCHAN | TCGA-BP-NOCHAN | TCGA-BP-NOCHAN | TCGA-B8-DOWN | TCGA-B2-NOCHAN | TCGA-AK-DOWN | TCGA-AS-NOCHAN | TCGA-CW-DOWN | TCGA-B0-DOWN |
|----------------|----------------|----------------|--------------|----------------|--------------|----------------|--------------|--------------|
| NOCHAN         | NOCHAN         | NOCHAN         | NOCHAN       | NOCHAN         | DOWN         | DOWN           | UP           | DOWN         |
| DOWN           | DOWN           | DOWN           | DOWN         | NOCHAN         | DOWN         | DOWN           | NOCHAN       | DOWN         |
| NOCHAN         | NOCHAN         | NOCHAN         | NOCHAN       | UP             | NOCHAN       | NOCHAN         | NOCHAN       | NOCHAN       |
| NOCHAN         | NOCHAN         | NOCHAN         | NOCHAN       | DOWN           | NOCHAN       | NOCHAN         | NOCHAN       | NOCHAN       |
| DOWN           | NOCHAN         | NOCHAN         | NOCHAN       | UP             | DOWN         | DOWN           | NOCHAN       | NOCHAN       |
| DOWN           | NOCHAN         | DOWN           | NOCHAN       | UP             | NOCHAN       | NOCHAN         | DOWN         | NOCHAN       |
| NOCHAN         | NOCHAN         | NOCHAN         | NOCHAN       | NOCHAN         | NOCHAN       | NOCHAN         | NOCHAN       | NOCHAN       |
| UP             | UP             | UP             | NOCHAN       | DOWN           | NOCHAN       | UP             | NOCHAN       | NOCHAN       |
| DOWN           | NOCHAN         | DOWN           | NOCHAN       | NOCHAN         | DOWN         | NOCHAN         | DOWN         | DOWN         |
| NOCHAN         | NOCHAN         | NOCHAN         | NOCHAN       | UP             | NOCHAN       | NOCHAN         | NOCHAN       | NOCHAN       |
| UP             | NOCHAN         | NOCHAN         | NOCHAN       | NOCHAN         | NOCHAN       | NOCHAN         | NOCHAN       | NOCHAN       |
| NOCHAN         | NOCHAN         | NOCHAN         | NOCHAN       | NOCHAN         | NOCHAN       | NOCHAN         | NOCHAN       | DOWN         |
| UP             | NOCHAN         | UP             | NOCHAN       | NOCHAN         | NOCHAN       | NOCHAN         | NOCHAN       | NOCHAN       |
| NOCHAN         | NOCHAN         | UP             | NOCHAN       | NOCHAN         | NOCHAN       | NOCHAN         | UP           | NOCHAN       |
| NOCHAN         | NOCHAN         | NOCHAN         | NOCHAN       | UP             | UP           | NOCHAN         | NOCHAN       | NOCHAN       |
| DOWN           | UP             | NOCHAN         | NOCHAN       | UP             | DOWN         | UP             | NOCHAN       | NOCHAN       |
| NOCHAN         | NOCHAN         | UP             | UP           | NOCHAN         | NOCHAN       | NOCHAN         | UP           | NOCHAN       |
| DOWN           | NOCHAN         | DOWN           | DOWN         | UP             | DOWN         | DOWN           | NOCHAN       | DOWN         |
| DOWN           | NOCHAN         | DOWN           | DOWN         | UP             | DOWN         | NOCHAN         | DOWN         | DOWN         |
| NOCHAN         | NOCHAN         | NOCHAN         | NOCHAN       | UP             | DOWN         | DOWN           | DOWN         | DOWN         |
| NOCHAN         | NOCHAN         | NOCHAN         | NOCHAN       | DOWN           | NOCHAN       | NOCHAN         | DOWN         | DOWN         |
| UP             | UP             | UP             | NOCHAN       | DOWN           | UP           | UP             | UP           | UP           |
| DOWN           | NOCHAN         | NOCHAN         | NOCHAN       | UP             | NOCHAN       | NOCHAN         | DOWN         | NOCHAN       |
| DOWN           | NOCHAN         | NOCHAN         | NOCHAN       | UP             | NOCHAN       | NOCHAN         | NOCHAN       | NOCHAN       |
| NOCHAN         | NOCHAN         | NOCHAN         | DOWN         | UP             | NOCHAN       | NOCHAN         | DOWN         | NOCHAN       |
| DOWN           | DOWN           | NOCHAN         | NOCHAN       | NOCHAN         | DOWN         | DOWN           | NOCHAN       | DOWN         |
| UP             | NOCHAN         | NOCHAN         | NOCHAN       | UP             | NOCHAN       | NOCHAN         | NOCHAN       | DOWN         |
| NOCHAN         | NOCHAN         | UP             | NOCHAN       | UP             | UP           | UP             | NOCHAN       | NOCHAN       |
| NOCHAN         | NOCHAN         | NOCHAN         | DOWN         | UP             | NOCHAN       | DOWN           | UP           | NOCHAN       |
| NOCHAN         | NOCHAN         | NOCHAN         | DOWN         | DOWN           | NOCHAN       | NOCHAN         | NOCHAN       | NOCHAN       |
| DOWN           | NOCHAN         | DOWN           | NOCHAN       | UP             | DOWN         | NOCHAN         | NOCHAN       | NOCHAN       |
| NOCHAN         | UP             | NOCHAN         | NOCHAN       | NOCHAN         | NOCHAN       | NOCHAN         | NOCHAN       | UP           |
| NOCHAN         | NOCHAN         | NOCHAN         | NOCHAN       | UP             | UP           | NOCHAN         | NOCHAN       | NOCHAN       |
| UP             | UP             | NOCHAN         | NOCHAN       | NOCHAN         | NOCHAN       | UP             | DOWN         | NOCHAN       |
| NOCHAN         | NOCHAN         | DOWN           | NOCHAN       | UP             | NOCHAN       | NOCHAN         | NOCHAN       | DOWN         |
| DOWN           | DOWN           | DOWN           | NOCHAN       | UP             | DOWN         | DOWN           | DOWN         | DOWN         |
| UP             | NOCHAN         | NOCHAN         | NOCHAN       | DOWN           | UP           | UP             | UP           | NOCHAN       |
| UP             | UP             | UP             | UP           | UP             | UP           | UP             | NOCHAN       | NOCHAN       |
| NOCHAN         | UP             | UP             | UP           | NOCHAN         | NOCHAN       | UP             | NOCHAN       | NOCHAN       |

| TCGA-B0- | TCGA-B0- | TCGA-AK- | TCGA-CJ- | TCGA-BP- | TCGA-B4- | TCGA-A3- | TCGA-BP- | TCGA-BP- |
|----------|----------|----------|----------|----------|----------|----------|----------|----------|
| NOCHAN(  | NOCHAN(  | NOCHAN(  | DOWN     | DOWN     | DOWN     | NOCHAN(  | DOWN     | DOWN     |
| DOWN     | DOWN     | NOCHAN(  | NOCHAN(  | NOCHAN(  | DOWN     | NOCHAN(  | DOWN     | NOCHAN(  |
| DOWN     | DOWN     | DOWN     | DOWN     | DOWN     | DOWN     | DOWN     | DOWN     | NOCHAN(  |
| NOCHAN(  | NOCHAN(  | UP       | NOCHAN(  | NOCHAN(  | NOCHAN(  | NOCHAN(  | UP       | NOCHAN(  |
| NOCHAN(  | NOCHAN(  | NOCHAN(  | NOCHAN(  | NOCHAN(  | NOCHAN(  | NOCHAN(  | NOCHAN(  | NOCHAN(  |
| DOWN     | DOWN     | NOCHAN(  | DOWN     | NOCHAN(  | NOCHAN(  | DOWN     | DOWN     | NOCHAN(  |
| NOCHAN(  | NOCHAN(  | UP       | DOWN     | DOWN     | DOWN     | NOCHAN(  | DOWN     | NOCHAN(  |
| NOCHAN(  | NOCHAN(  | NOCHAN(  | NOCHAN(  | NOCHAN(  | UP       | NOCHAN(  | DOWN     | NOCHAN(  |
| UP       | UP       | NOCHAN(  | NOCHAN(  | NOCHAN(  | UP       | NOCHAN(  | UP       | NOCHAN(  |
| NOCHAN(  | NOCHAN(  | DOWN     | DOWN     | NOCHAN(  | DOWN     | NOCHAN(  | DOWN     | NOCHAN(  |
| UP       | UP       | NOCHAN(  | NOCHAN(  | UP       | NOCHAN(  | NOCHAN(  | UP       | NOCHAN(  |
| NOCHAN(  | NOCHAN(  | NOCHAN(  | NOCHAN(  | NOCHAN(  | UP       | NOCHAN(  | NOCHAN(  | NOCHAN(  |
| NOCHAN(  | NOCHAN(  | NOCHAN(  | NOCHAN(  | NOCHAN(  | UP       | NOCHAN(  | NOCHAN(  | NOCHAN(  |
| NOCHAN(  | UP       | NOCHAN(  | NOCHAN(  | NOCHAN(  | UP       | NOCHAN(  | UP       | NOCHAN(  |
| NOCHAN(  | NOCHAN(  | NOCHAN(  | NOCHAN(  | DOWN     | UP       | NOCHAN(  | DOWN     | NOCHAN(  |
| NOCHAN(  | UP       | NOCHAN(  | UP       | NOCHAN(  | NOCHAN(  | NOCHAN(  | NOCHAN(  | UP       |
| NOCHAN(  | UP       | NOCHAN(  | NOCHAN(  | UP       | NOCHAN(  | NOCHAN(  | NOCHAN(  | NOCHAN(  |
| UP       | NOCHAN(  | NOCHAN(  | NOCHAN(  | NOCHAN(  | UP       | UP       | NOCHAN(  | NOCHAN(  |
| NOCHAN(  | DOWN     | UP       | DOWN     | DOWN     | NOCHAN(  | DOWN     | DOWN     | DOWN     |
| NOCHAN(  | NOCHAN(  | NOCHAN(  | DOWN     | NOCHAN(  | NOCHAN(  | NOCHAN(  | DOWN     | DOWN     |
| NOCHAN(  | DOWN     | UP       | DOWN     | NOCHAN(  | NOCHAN(  | NOCHAN(  | DOWN     | NOCHAN(  |
| NOCHAN(  | NOCHAN(  | DOWN     | DOWN     | NOCHAN(  | NOCHAN(  | DOWN     | NOCHAN(  | NOCHAN(  |
| UP       | UP       | DOWN     | UP       | UP       | UP       | NOCHAN(  | UP       | UP       |
| NOCHAN(  | NOCHAN(  | NOCHAN(  | NOCHAN(  | NOCHAN(  | DOWN     | NOCHAN(  | DOWN     | DOWN     |
| NOCHAN(  | NOCHAN(  | NOCHAN(  | NOCHAN(  | NOCHAN(  | UP       | NOCHAN(  | DOWN     | NOCHAN(  |
| NOCHAN(  | NOCHAN(  | NOCHAN(  | NOCHAN(  | NOCHAN(  | NOCHAN(  | NOCHAN(  | NOCHAN(  | NOCHAN(  |
| DOWN     | DOWN     | NOCHAN(  | DOWN     | DOWN     | DOWN     | NOCHAN(  | DOWN     | DOWN     |
| NOCHAN(  | NOCHAN(  | UP       | DOWN     | NOCHAN(  | NOCHAN(  | NOCHAN(  | DOWN     | NOCHAN(  |
| NOCHAN(  | NOCHAN(  | UP       | NOCHAN(  | NOCHAN(  | NOCHAN(  | NOCHAN(  | DOWN     | NOCHAN(  |
| DOWN     | NOCHAN(  | NOCHAN(  | DOWN     | DOWN     | UP       | NOCHAN(  | NOCHAN(  | NOCHAN(  |
| NOCHAN(  | NOCHAN(  | NOCHAN(  | NOCHAN(  | NOCHAN(  | UP       | DOWN     | NOCHAN(  | NOCHAN(  |
| NOCHAN(  | NOCHAN(  | NOCHAN(  | NOCHAN(  | NOCHAN(  | DOWN     | NOCHAN(  | DOWN     | NOCHAN(  |
| NOCHAN(  | UP       | NOCHAN(  | NOCHAN(  | UP       | UP       | UP       | NOCHAN(  | NOCHAN(  |
| NOCHAN(  | NOCHAN(  | NOCHAN(  | NOCHAN(  | NOCHAN(  | UP       | DOWN     | NOCHAN(  | NOCHAN(  |
| UP       | NOCHAN(  | NOCHAN(  | NOCHAN(  | NOCHAN(  | NOCHAN(  | DOWN     | NOCHAN(  | NOCHAN(  |
| NOCHAN(  | NOCHAN(  | NOCHAN(  | NOCHAN(  | NOCHAN(  | NOCHAN(  | DOWN     | DOWN     | NOCHAN(  |
| DOWN     | DOWN     | NOCHAN(  | DOWN     | NOCHAN(  | DOWN     | DOWN     | DOWN     | NOCHAN(  |
| UP       | UP       | NOCHAN(  | NOCHAN(  | NOCHAN(  | UP       | UP       | NOCHAN(  | NOCHAN(  |
| UP       | UP       | NOCHAN(  | UP       | UP       | DOWN     | UP       | DOWN     | UP       |
| NOCHAN(  | UP       | UP       | NOCHAN(  | NOCHAN(  | NOCHAN(  | UP       | UP       | NOCHAN(  |

[illegible]

| TCGA-DV | TCGA-B0- | TCGA-CJ- | TCGA-BP- | TCGA-B2- | TCGA-BP- | TCGA-B2- | TCGA-B2- | TCGA-G6- |
|---------|----------|----------|----------|----------|----------|----------|----------|----------|
| DOWN    | NOCHAN(  | NOCHAN(  | NOCHAN(  | DOWN     | NOCHAN(  | DOWN     | NOCHAN(  | NOCHAN(  |
| DOWN    | DOWN     | DOWN     | NOCHAN(  | NOCHAN(  | NOCHAN(  | NOCHAN(  | UP       | DOWN     |
| DOWN    | DOWN     | DOWN     | DOWN     | NOCHAN(  | DOWN     | DOWN     | NOCHAN(  | DOWN     |
| NOCHAN( | UP       | NOCHAN(  | UP       | UP       | NOCHAN(  | NOCHAN(  | NOCHAN(  | UP       |
| NOCHAN( | UP       | NOCHAN(  | UP       | NOCHAN(  | NOCHAN(  | NOCHAN(  | NOCHAN(  | DOWN     |
| NOCHAN( | DOWN     | DOWN     | DOWN     | NOCHAN(  | DOWN     | NOCHAN(  | UP       | DOWN     |
| NOCHAN( | DOWN     | NOCHAN(  | DOWN     | NOCHAN(  | NOCHAN(  | NOCHAN(  | UP       | DOWN     |
| NOCHAN( | NOCHAN(  | NOCHAN(  | NOCHAN(  | NOCHAN(  | NOCHAN(  | DOWN     | DOWN     | NOCHAN(  |
| NOCHAN( | UP       | UP       | UP       | NOCHAN(  | NOCHAN(  | UP       | DOWN     | UP       |
| NOCHAN( | DOWN     | NOCHAN(  | NOCHAN(  | DOWN     | UP       | DOWN     | UP       | DOWN     |
| NOCHAN( | NOCHAN(  | NOCHAN(  | NOCHAN(  | NOCHAN(  | NOCHAN(  | NOCHAN(  | NOCHAN(  | NOCHAN(  |
| DOWN    | NOCHAN(  | NOCHAN(  | NOCHAN(  | NOCHAN(  | NOCHAN(  | UP       | DOWN     | NOCHAN(  |
| NOCHAN( | NOCHAN(  | NOCHAN(  | NOCHAN(  | NOCHAN(  | NOCHAN(  | NOCHAN(  | NOCHAN(  | NOCHAN(  |
| NOCHAN( | UP       | UP       | UP       | NOCHAN(  | NOCHAN(  | UP       | DOWN     | UP       |
| NOCHAN( | NOCHAN(  | NOCHAN(  | NOCHAN(  | NOCHAN(  | NOCHAN(  | DOWN     | DOWN     | DOWN     |
| NOCHAN( | NOCHAN(  | NOCHAN(  | UP       | NOCHAN(  | NOCHAN(  | UP       | DOWN     | NOCHAN(  |
| NOCHAN( | UP       | NOCHAN(  | UP       | UP       | NOCHAN(  | NOCHAN(  | UP       | NOCHAN(  |
| UP      | NOCHAN(  | UP       | NOCHAN(  | UP       | NOCHAN(  | NOCHAN(  | NOCHAN(  | NOCHAN(  |
| NOCHAN( | DOWN     | DOWN     | DOWN     | DOWN     | NOCHAN(  | NOCHAN(  | UP       | DOWN     |
| NOCHAN( | DOWN     | DOWN     | NOCHAN(  | NOCHAN(  | DOWN     | NOCHAN(  | UP       | DOWN     |
| NOCHAN( | DOWN     | DOWN     | DOWN     | NOCHAN(  | NOCHAN(  | DOWN     | UP       | DOWN     |
| NOCHAN( | NOCHAN(  | NOCHAN(  | NOCHAN(  | DOWN     | NOCHAN(  | NOCHAN(  | DOWN     | NOCHAN(  |
| UP      | UP       | UP       | UP       | NOCHAN(  | UP       | UP       | DOWN     | UP       |
| NOCHAN( | DOWN     | DOWN     | NOCHAN(  | NOCHAN(  | NOCHAN(  | NOCHAN(  | UP       | DOWN     |
| DOWN    | NOCHAN(  | NOCHAN(  | NOCHAN(  | NOCHAN(  | NOCHAN(  | NOCHAN(  | NOCHAN(  | UP       |
| NOCHAN( | NOCHAN(  | NOCHAN(  | NOCHAN(  | NOCHAN(  | NOCHAN(  | NOCHAN(  | NOCHAN(  | NOCHAN(  |
| DOWN    | DOWN     | DOWN     | DOWN     | NOCHAN(  | DOWN     | DOWN     | NOCHAN(  | DOWN     |
| NOCHAN( | NOCHAN(  | NOCHAN(  | NOCHAN(  | NOCHAN(  | NOCHAN(  | UP       | NOCHAN(  | DOWN     |
| UP      | NOCHAN(  | NOCHAN(  | NOCHAN(  | UP       | NOCHAN(  | NOCHAN(  | DOWN     | NOCHAN(  |
| NOCHAN( | NOCHAN(  | NOCHAN(  | DOWN     | DOWN     | DOWN     | NOCHAN(  | NOCHAN(  | DOWN     |
| NOCHAN( | UP       | NOCHAN(  | NOCHAN(  | DOWN     | DOWN     | UP       | DOWN     | UP       |
| NOCHAN( | DOWN     | NOCHAN(  | NOCHAN(  | NOCHAN(  | NOCHAN(  | NOCHAN(  | UP       | DOWN     |
| UP      | NOCHAN(  | NOCHAN(  | NOCHAN(  | UP       | NOCHAN(  | NOCHAN(  | UP       | DOWN     |
| NOCHAN( | NOCHAN(  | UP       | NOCHAN(  | NOCHAN(  | NOCHAN(  | UP       | DOWN     | UP       |
| NOCHAN( | NOCHAN(  | UP       | UP       | NOCHAN(  | NOCHAN(  | NOCHAN(  | DOWN     | DOWN     |
| NOCHAN( | NOCHAN(  | NOCHAN(  | NOCHAN(  | NOCHAN(  | NOCHAN(  | NOCHAN(  | NOCHAN(  | UP       |
| DOWN    | DOWN     | DOWN     | NOCHAN(  | DOWN     | NOCHAN(  | NOCHAN(  | NOCHAN(  | DOWN     |
| UP      | NOCHAN(  | NOCHAN(  | NOCHAN(  | NOCHAN(  | NOCHAN(  | UP       | NOCHAN(  | NOCHAN(  |
| NOCHAN( | NOCHAN(  | NOCHAN(  | NOCHAN(  | UP       | UP       | UP       | UP       | DOWN     |
| NOCHAN( | UP       | NOCHAN(  | UP       | UP       | NOCHAN(  | NOCHAN(  | DOWN     | NOCHAN(  |

|          |          |          |          |          |         |          |         |          |
|----------|----------|----------|----------|----------|---------|----------|---------|----------|
| TCGA-B0- | TCGA-BP- | TCGA-BP- | TCGA-AK- | TCGA-CZ- | TCGA-MN | TCGA-BP- | TCGA-DV | TCGA-BP- |
| DOWN     | NOCHAN(  | DOWN     | NOCHAN(  | NOCHAN(  | DOWN    | DOWN     | DOWN    | NOCHAN(  |
| NOCHAN(  | DOWN     | NOCHAN(  | DOWN     | DOWN     | DOWN    | DOWN     | NOCHAN( | DOWN     |
| NOCHAN(  | DOWN     | DOWN     | DOWN     | DOWN     | DOWN    | DOWN     | DOWN    | DOWN     |
| NOCHAN(  | UP       | NOCHAN(  | NOCHAN(  | NOCHAN(  | UP      | NOCHAN(  | NOCHAN( | NOCHAN(  |
| NOCHAN(  | NOCHAN(  | NOCHAN(  | DOWN     | NOCHAN(  | NOCHAN( | NOCHAN(  | NOCHAN( | NOCHAN(  |
| NOCHAN(  | DOWN     | NOCHAN(  | DOWN     | DOWN     | DOWN    | DOWN     | DOWN    | DOWN     |
| NOCHAN(  | NOCHAN(  | DOWN     | DOWN     | DOWN     | NOCHAN( | DOWN     | DOWN    | DOWN     |
| NOCHAN(  | NOCHAN(  | NOCHAN(  | DOWN     | NOCHAN(  | DOWN    | NOCHAN(  | NOCHAN( | NOCHAN(  |
| NOCHAN(  | UP       | NOCHAN(  | UP       | UP       | NOCHAN( | UP       | UP      | UP       |
| NOCHAN(  | NOCHAN(  | DOWN     | DOWN     | NOCHAN(  | DOWN    | DOWN     | NOCHAN( | DOWN     |
| NOCHAN(  | UP       | NOCHAN(  | NOCHAN(  | NOCHAN(  | NOCHAN( | NOCHAN(  | NOCHAN( | NOCHAN(  |
| NOCHAN(  | NOCHAN(  | NOCHAN(  | UP       | NOCHAN(  | NOCHAN( | NOCHAN(  | NOCHAN( | NOCHAN(  |
| NOCHAN(  | NOCHAN(  | DOWN     | NOCHAN(  | NOCHAN(  | DOWN    | NOCHAN(  | NOCHAN( | NOCHAN(  |
| NOCHAN(  | NOCHAN(  | NOCHAN(  | UP       | UP       | NOCHAN( | UP       | UP      | NOCHAN(  |
| NOCHAN(  | NOCHAN(  | NOCHAN(  | DOWN     | DOWN     | DOWN    | NOCHAN(  | NOCHAN( | NOCHAN(  |
| NOCHAN(  | NOCHAN(  | NOCHAN(  | UP       | NOCHAN(  | UP      | NOCHAN(  | NOCHAN( | NOCHAN(  |
| NOCHAN(  | UP       | NOCHAN(  | DOWN     | DOWN     | NOCHAN( | DOWN     | NOCHAN( | NOCHAN(  |
| NOCHAN(  | NOCHAN(  | NOCHAN(  | DOWN     | NOCHAN(  | NOCHAN( | NOCHAN(  | NOCHAN( | NOCHAN(  |
| NOCHAN(  | DOWN     | DOWN     | NOCHAN(  | DOWN     | DOWN    | DOWN     | DOWN    | DOWN     |
| NOCHAN(  | NOCHAN(  | NOCHAN(  | DOWN     | DOWN     | DOWN    | DOWN     | DOWN    | DOWN     |
| NOCHAN(  | DOWN     | DOWN     | DOWN     | DOWN     | DOWN    | DOWN     | DOWN    | DOWN     |
| NOCHAN(  | NOCHAN(  | DOWN     | UP       | NOCHAN(  | NOCHAN( | NOCHAN(  | NOCHAN( | NOCHAN(  |
| UP       | UP       | NOCHAN(  | UP       | UP       | UP      | UP       | UP      | UP       |
| NOCHAN(  | NOCHAN(  | NOCHAN(  | DOWN     | NOCHAN(  | NOCHAN( | DOWN     | DOWN    | DOWN     |
| NOCHAN(  | NOCHAN(  | NOCHAN(  | DOWN     | DOWN     | NOCHAN( | NOCHAN(  | NOCHAN( | NOCHAN(  |
| DOWN     | NOCHAN(  | NOCHAN(  | DOWN     | NOCHAN(  | NOCHAN( | DOWN     | NOCHAN( | DOWN     |
| DOWN     | DOWN     | NOCHAN(  | DOWN     | DOWN     | DOWN    | DOWN     | DOWN    | DOWN     |
| NOCHAN(  | DOWN     | NOCHAN(  | UP       | NOCHAN(  | DOWN    | NOCHAN(  | NOCHAN( | NOCHAN(  |
| NOCHAN(  | NOCHAN(  | UP       | DOWN     | DOWN     | NOCHAN( | NOCHAN(  | UP      | DOWN     |
| NOCHAN(  | NOCHAN(  | NOCHAN(  | NOCHAN(  | NOCHAN(  | NOCHAN( | NOCHAN(  | NOCHAN( | DOWN     |
| NOCHAN(  | UP       | NOCHAN(  | UP       | UP       | NOCHAN( | NOCHAN(  | UP      |          |
| NOCHAN(  | DOWN     | NOCHAN(  | DOWN     | DOWN     | NOCHAN( | NOCHAN(  | DOWN    | DOWN     |
| UP       | UP       | NOCHAN(  | NOCHAN(  | NOCHAN(  | NOCHAN( | NOCHAN(  | NOCHAN( | NOCHAN(  |
| NOCHAN(  | NOCHAN(  | NOCHAN(  | UP       | NOCHAN(  | UP      | NOCHAN(  | NOCHAN( | NOCHAN(  |
| NOCHAN(  | NOCHAN(  | NOCHAN(  | UP       | DOWN     | NOCHAN( | NOCHAN(  | UP      | NOCHAN(  |
| NOCHAN(  | NOCHAN(  | DOWN     | NOCHAN(  | NOCHAN(  | DOWN    | DOWN     | NOCHAN( |          |
| DOWN     | DOWN     | NOCHAN(  | DOWN     | DOWN     | DOWN    | DOWN     | DOWN    | DOWN     |
| UP       | NOCHAN(  | NOCHAN(  | UP       | UP       | NOCHAN( | NOCHAN(  | UP      | NOCHAN(  |
| UP       | NOCHAN(  | UP       | DOWN     | NOCHAN(  | NOCHAN( | NOCHAN(  | NOCHAN( | DOWN     |
| NOCHAN(  | UP       | UP       | DOWN     | NOCHAN(  | NOCHAN( | NOCHAN(  | NOCHAN( | NOCHAN(  |



| TCGA-BP- | TCGA-BP- | TCGA-AK- | TCGA-CZ- | TCGA-A3- | TCGA-B0- | TCGA-CJ- | TCGA-BP- | TCGA-B2- |
|----------|----------|----------|----------|----------|----------|----------|----------|----------|
| NOCHAN(  | DOWN     | NOCHAN(  | NOCHAN(  | NOCHAN(  | NOCHAN(  | NOCHAN(  | DOWN     | NOCHAN(  |
| NOCHAN(  | NOCHAN(  | DOWN     | DOWN     | DOWN     | DOWN     | NOCHAN(  | DOWN     | NOCHAN(  |
| NOCHAN(  | NOCHAN(  | DOWN     | DOWN     | DOWN     | DOWN     | DOWN     | DOWN     | DOWN     |
| NOCHAN(  | DOWN     | NOCHAN(  | NOCHAN(  | UP       | NOCHAN(  | NOCHAN(  | NOCHAN(  | NOCHAN(  |
| NOCHAN(  | DOWN     | NOCHAN(  | NOCHAN(  | NOCHAN(  | NOCHAN(  | NOCHAN(  | NOCHAN(  | NOCHAN(  |
| NOCHAN(  | NOCHAN(  | DOWN     | DOWN     | NOCHAN(  | DOWN     | NOCHAN(  | DOWN     | DOWN     |
| NOCHAN(  | NOCHAN(  | NOCHAN(  | NOCHAN(  | DOWN     | DOWN     | DOWN     | DOWN     | NOCHAN(  |
| NOCHAN(  | UP       | DOWN     | NOCHAN(  | NOCHAN(  | NOCHAN(  | NOCHAN(  | NOCHAN(  | NOCHAN(  |
| NOCHAN(  | DOWN     | NOCHAN(  | UP       | UP       | UP       | UP       | NOCHAN(  | UP       |
| NOCHAN(  | DOWN     | NOCHAN(  | NOCHAN(  | NOCHAN(  | NOCHAN(  | DOWN     | DOWN     | NOCHAN(  |
| NOCHAN(  | NOCHAN(  | UP       | NOCHAN(  | NOCHAN(  | UP       | NOCHAN(  | NOCHAN(  | NOCHAN(  |
| NOCHAN(  | NOCHAN(  | UP       | NOCHAN(  | NOCHAN(  | DOWN     | NOCHAN(  | DOWN     | NOCHAN(  |
| NOCHAN(  | NOCHAN(  | NOCHAN(  | UP       | NOCHAN(  | NOCHAN(  | NOCHAN(  | NOCHAN(  | NOCHAN(  |
| NOCHAN(  | NOCHAN(  | UP       | NOCHAN(  | NOCHAN(  | NOCHAN(  | NOCHAN(  | NOCHAN(  | NOCHAN(  |
| NOCHAN(  | DOWN     | DOWN     | DOWN     | NOCHAN(  | DOWN     | NOCHAN(  | DOWN     | NOCHAN(  |
| NOCHAN(  | UP       | UP       | UP       | NOCHAN(  | NOCHAN(  | NOCHAN(  | NOCHAN(  | NOCHAN(  |
| NOCHAN(  | DOWN     | NOCHAN(  | NOCHAN(  | NOCHAN(  | NOCHAN(  | NOCHAN(  | DOWN     | NOCHAN(  |
| UP       | NOCHAN(  | NOCHAN(  | UP       | NOCHAN(  | NOCHAN(  | NOCHAN(  | NOCHAN(  | NOCHAN(  |
| DOWN     | NOCHAN(  | NOCHAN(  | DOWN     | DOWN     | DOWN     | DOWN     | DOWN     | DOWN     |
| DOWN     | NOCHAN(  | DOWN     | DOWN     | NOCHAN(  | DOWN     | DOWN     | DOWN     | DOWN     |
| NOCHAN(  | NOCHAN(  | DOWN     | NOCHAN(  | DOWN     | DOWN     | DOWN     | DOWN     | DOWN     |
| NOCHAN(  | NOCHAN(  | UP       | NOCHAN(  | NOCHAN(  | NOCHAN(  | DOWN     | NOCHAN(  | NOCHAN(  |
| NOCHAN(  | UP       | UP       | UP       | UP       | UP       | UP       | UP       | UP       |
| NOCHAN(  | NOCHAN(  | NOCHAN(  | NOCHAN(  | NOCHAN(  | DOWN     | NOCHAN(  | DOWN     | NOCHAN(  |
| NOCHAN(  | NOCHAN(  | NOCHAN(  | NOCHAN(  | NOCHAN(  | DOWN     | NOCHAN(  | DOWN     | NOCHAN(  |
| NOCHAN(  | DOWN     | DOWN     | NOCHAN(  | NOCHAN(  | DOWN     | DOWN     | DOWN     | NOCHAN(  |
| DOWN     | DOWN     | DOWN     | DOWN     | NOCHAN(  | DOWN     | DOWN     | DOWN     | NOCHAN(  |
| NOCHAN(  | UP       | UP       | NOCHAN(  | NOCHAN(  | DOWN     | NOCHAN(  | DOWN     | NOCHAN(  |
| NOCHAN(  | NOCHAN(  | DOWN     | NOCHAN(  | UP       | NOCHAN(  | NOCHAN(  | NOCHAN(  | NOCHAN(  |
| NOCHAN(  | UP       | NOCHAN(  | NOCHAN(  | NOCHAN(  | NOCHAN(  | NOCHAN(  | DOWN     | DOWN     |
| DOWN     | NOCHAN(  | UP       | NOCHAN(  | NOCHAN(  | NOCHAN(  | NOCHAN(  | UP       | NOCHAN(  |
| NOCHAN(  | UP       | NOCHAN(  | NOCHAN(  | NOCHAN(  | DOWN     | DOWN     | DOWN     | NOCHAN(  |
| UP       | UP       | NOCHAN(  | UP       | NOCHAN(  | NOCHAN(  | NOCHAN(  | DOWN     | NOCHAN(  |
| NOCHAN(  | NOCHAN(  | UP       | NOCHAN(  | NOCHAN(  | NOCHAN(  | NOCHAN(  | NOCHAN(  | NOCHAN(  |
| NOCHAN(  | UP       | NOCHAN(  | UP       | NOCHAN(  | DOWN     | NOCHAN(  | NOCHAN(  | NOCHAN(  |
| NOCHAN(  | NOCHAN(  | NOCHAN(  | NOCHAN(  | NOCHAN(  | NOCHAN(  | NOCHAN(  | DOWN     | NOCHAN(  |
| DOWN     | DOWN     | NOCHAN(  | DOWN     | DOWN     | DOWN     | DOWN     | DOWN     | DOWN     |
| NOCHAN(  | UP       | UP       | NOCHAN(  | NOCHAN(  | NOCHAN(  | UP       | NOCHAN(  | NOCHAN(  |
| UP       | UP       | NOCHAN(  | UP       | NOCHAN(  | DOWN     | NOCHAN(  | DOWN     | NOCHAN(  |
| UP       | DOWN     | DOWN     | NOCHAN(  | UP       | NOCHAN(  | NOCHAN(  | DOWN     | UP       |

TCGA-T7- TCGA-CJ- TCGA-G6- TCGA-BP- TCGA-AK- TCGA-BP- TCGA-CZ- TCGA-B0- TCGA-CJ-  
NOCHAN( DOWN NOCHAN( DOWN NOCHAN( DOWN NOCHAN( DOWN DOWN  
NOCHAN( DOWN DOWN NOCHAN( DOWN NOCHAN( NOCHAN( DOWN DOWN  
NOCHAN( DOWN DOWN NOCHAN( DOWN DOWN NOCHAN( DOWN DOWN  
UP NOCHAN( UP NOCHAN( NOCHAN( NOCHAN( NOCHAN( UP NOCHAN(  
NOCHAN( NOCHAN( NOCHAN( NOCHAN( NOCHAN( NOCHAN( NOCHAN( NOCHAN( NOCHAN(  
NOCHAN( DOWN DOWN DOWN DOWN NOCHAN( NOCHAN( DOWN DOWN  
DOWN NOCHAN( DOWN NOCHAN( NOCHAN( DOWN DOWN DOWN DOWN  
UP NOCHAN( NOCHAN( NOCHAN( NOCHAN( NOCHAN( DOWN NOCHAN( NOCHAN( NOCHAN(  
UP NOCHAN( UP NOCHAN( NOCHAN( NOCHAN( UP UP UP  
DOWN DOWN DOWN DOWN DOWN NOCHAN( NOCHAN( DOWN DOWN  
NOCHAN( UP UP NOCHAN( NOCHAN( NOCHAN( NOCHAN( NOCHAN( UP  
NOCHAN( NOCHAN( NOCHAN( NOCHAN( NOCHAN( NOCHAN( NOCHAN( NOCHAN( NOCHAN(  
NOCHAN( NOCHAN( NOCHAN( NOCHAN( NOCHAN( NOCHAN( NOCHAN( NOCHAN( NOCHAN(  
NOCHAN( NOCHAN( NOCHAN( NOCHAN( NOCHAN( NOCHAN( NOCHAN( UP UP  
NOCHAN( NOCHAN( NOCHAN( NOCHAN( NOCHAN( NOCHAN( NOCHAN( NOCHAN( NOCHAN(  
DOWN NOCHAN( NOCHAN( NOCHAN( UP UP NOCHAN( UP NOCHAN(  
UP NOCHAN( UP NOCHAN( NOCHAN( NOCHAN( NOCHAN( DOWN UP NOCHAN(  
NOCHAN( NOCHAN( NOCHAN( NOCHAN( NOCHAN( NOCHAN( NOCHAN( NOCHAN( UP  
NOCHAN( DOWN NOCHAN( DOWN NOCHAN( NOCHAN( NOCHAN( DOWN NOCHAN(  
UP UP NOCHAN( NOCHAN( NOCHAN( NOCHAN( NOCHAN( UP NOCHAN( NOCHAN(  
NOCHAN( NOCHAN( UP NOCHAN( UP NOCHAN( UP NOCHAN( NOCHAN(  
NOCHAN( DOWN DOWN NOCHAN( NOCHAN( NOCHAN( NOCHAN( NOCHAN( DOWN NOCHAN(  
UP UP NOCHAN( NOCHAN( NOCHAN( NOCHAN( NOCHAN( UP NOCHAN( NOCHAN(  
NOCHAN( NOCHAN( UP NOCHAN( NOCHAN( NOCHAN( NOCHAN( NOCHAN( NOCHAN(  
NOCHAN( NOCHAN( UP NOCHAN( NOCHAN( UP UP NOCHAN( NOCHAN(  
NOCHAN( DOWN NOCHAN( DOWN NOCHAN( NOCHAN( NOCHAN( DOWN NOCHAN(  
UP DOWN DOWN DOWN DOWN NOCHAN( NOCHAN( DOWN DOWN  
NOCHAN( NOCHAN( NOCHAN( NOCHAN( UP UP NOCHAN( UP NOCHAN(  
DOWN NOCHAN( NOCHAN( NOCHAN( NOCHAN( NOCHAN( UP NOCHAN( NOCHAN( UP  
NOCHAN( NOCHAN( UP NOCHAN( NOCHAN( NOCHAN( NOCHAN( UP UP

TCGA-B8- TCGA-CJ- TCGA-BP- TCGA-B2- TCGA-B2- TCGA-BP- TCGA-A3- TCGA-A3- TCGA-BP-  
NOCHAN( NOCHAN( DOWN NOCHAN( NOCHAN( DOWN NOCHAN( NOCHAN( NOCHAN(  
DOWN NOCHAN( DOWN NOCHAN( UP DOWN NOCHAN( DOWN NOCHAN(  
DOWN NOCHAN( DOWN DOWN DOWN DOWN DOWN DOWN DOWN  
UP NOCHAN( NOCHAN( NOCHAN( UP NOCHAN( NOCHAN( UP NOCHAN(  
NOCHAN( NOCHAN( NOCHAN( NOCHAN( DOWN DOWN NOCHAN( NOCHAN( NOCHAN(  
DOWN NOCHAN( DOWN NOCHAN( UP DOWN DOWN DOWN DOWN  
NOCHAN( DOWN NOCHAN( NOCHAN( UP DOWN NOCHAN( NOCHAN( DOWN  
NOCHAN( NOCHAN( NOCHAN( NOCHAN( NOCHAN( NOCHAN( NOCHAN( NOCHAN( UP  
UP NOCHAN( UP NOCHAN( NOCHAN( UP NOCHAN( UP UP  
DOWN NOCHAN( DOWN NOCHAN( NOCHAN( DOWN NOCHAN( NOCHAN( DOWN  
UP NOCHAN( UP NOCHAN( NOCHAN( UP NOCHAN( UP NOCHAN(  
NOCHAN( NOCHAN( NOCHAN( NOCHAN( NOCHAN( DOWN NOCHAN( NOCHAN( UP  
NOCHAN( NOCHAN( NOCHAN( UP NOCHAN( NOCHAN( NOCHAN( NOCHAN( NOCHAN(  
NOCHAN( NOCHAN( NOCHAN( NOCHAN( UP NOCHAN( NOCHAN( NOCHAN( NOCHAN(  
NOCHAN( NOCHAN( NOCHAN( NOCHAN( NOCHAN( NOCHAN( NOCHAN( UP NOCHAN(  
DOWN NOCHAN( DOWN DOWN UP DOWN NOCHAN( DOWN DOWN  
DOWN DOWN DOWN DOWN NOCHAN( DOWN DOWN NOCHAN( DOWN  
DOWN DOWN DOWN NOCHAN( UP DOWN NOCHAN( DOWN DOWN  
NOCHAN( NOCHAN( NOCHAN( NOCHAN( DOWN NOCHAN( NOCHAN( NOCHAN( NOCHAN(  
UP UP UP UP DOWN UP UP UP UP  
DOWN NOCHAN( DOWN NOCHAN( UP DOWN DOWN NOCHAN( DOWN  
NOCHAN( NOCHAN( DOWN NOCHAN( NOCHAN( DOWN NOCHAN( NOCHAN( NOCHAN(  
DOWN NOCHAN( DOWN NOCHAN( UP DOWN NOCHAN( NOCHAN( NOCHAN(  
DOWN DOWN DOWN DOWN NOCHAN( DOWN DOWN NOCHAN( DOWN  
DOWN NOCHAN( DOWN NOCHAN( UP DOWN NOCHAN( NOCHAN( NOCHAN(  
NOCHAN( NOCHAN( NOCHAN( NOCHAN( UP DOWN NOCHAN( UP NOCHAN(  
NOCHAN( DOWN NOCHAN( NOCHAN( NOCHAN( DOWN DOWN NOCHAN( NOCHAN(  
UP NOCHAN( UP NOCHAN( DOWN UP NOCHAN( NOCHAN( UP  
DOWN NOCHAN( DOWN NOCHAN( UP DOWN NOCHAN( NOCHAN( DOWN  
NOCHAN( NOCHAN( NOCHAN( NOCHAN( NOCHAN( DOWN NOCHAN( NOCHAN( NOCHAN(  
UP NOCHAN( NOCHAN( NOCHAN( NOCHAN( UP DOWN NOCHAN( NOCHAN(  
NOCHAN( UP NOCHAN( NOCHAN( DOWN NOCHAN( UP NOCHAN( UP  
DOWN DOWN DOWN NOCHAN( UP DOWN NOCHAN( NOCHAN( NOCHAN(  
DOWN NOCHAN( DOWN DOWN UP DOWN DOWN NOCHAN( DOWN  
NOCHAN( NOCHAN( NOCHAN( NOCHAN( DOWN NOCHAN( UP NOCHAN( UP  
DOWN NOCHAN( NOCHAN( UP UP DOWN UP NOCHAN( NOCHAN(  
NOCHAN( NOCHAN( UP NOCHAN( UP DOWN NOCHAN( UP NOCHAN(

| TCGA-BP | TCGA-B2 | TCGA-B0 | TCGA-A3 | TCGA-CW | TCGA-B8 | TCGA-BP | TCGA-B0 | TCGA-CW |
|---------|---------|---------|---------|---------|---------|---------|---------|---------|
| NOCHAN( | DOWN    | DOWN    | UP      | NOCHAN( | DOWN    | NOCHAN( | DOWN    | DOWN    |
| NOCHAN( | NOCHAN( | DOWN    | NOCHAN( | DOWN    | NOCHAN( | NOCHAN( | NOCHAN( | DOWN    |
| DOWN    | NOCHAN( | DOWN    | NOCHAN( | DOWN    | DOWN    | DOWN    | DOWN    | DOWN    |
| NOCHAN( | NOCHAN( | UP      | UP      | NOCHAN( | UP      | NOCHAN( | NOCHAN( | NOCHAN( |
| NOCHAN( | NOCHAN( | NOCHAN( | NOCHAN( | NOCHAN( | NOCHAN( | NOCHAN( | NOCHAN( | DOWN    |
| NOCHAN( | NOCHAN( | DOWN    | UP      | DOWN    | NOCHAN( | DOWN    | NOCHAN( | DOWN    |
| NOCHAN( | NOCHAN( | NOCHAN( | UP      | NOCHAN( | NOCHAN( | DOWN    | NOCHAN( | NOCHAN( |
| NOCHAN( | NOCHAN( | UP      | NOCHAN( | UP      | NOCHAN( | NOCHAN( | NOCHAN( | NOCHAN( |
| NOCHAN( | DOWN    | UP      | UP      | UP      | UP      | UP      | UP      | NOCHAN( |
| NOCHAN( | NOCHAN( | DOWN    | DOWN    | NOCHAN( | NOCHAN( | NOCHAN( | DOWN    | DOWN    |
| NOCHAN( | UP      | NOCHAN( | NOCHAN( | NOCHAN( | NOCHAN( | NOCHAN( | NOCHAN( | UP      |
| NOCHAN( | NOCHAN( | DOWN    | UP      | NOCHAN( | NOCHAN( | NOCHAN( | NOCHAN( | NOCHAN( |
| NOCHAN( | NOCHAN( | DOWN    | NOCHAN( | NOCHAN( | NOCHAN( | NOCHAN( | NOCHAN( | DOWN    |
| NOCHAN( | DOWN    | NOCHAN( | UP      | NOCHAN( | NOCHAN( | NOCHAN( | NOCHAN( | NOCHAN( |
| NOCHAN( | NOCHAN( | DOWN    | NOCHAN( | NOCHAN( | NOCHAN( | NOCHAN( | UP      | NOCHAN( |
| NOCHAN( | UP      | NOCHAN( | NOCHAN( | NOCHAN( | NOCHAN( | NOCHAN( | NOCHAN( | UP      |
| NOCHAN( | NOCHAN( | NOCHAN( | UP      | UP      | UP      | NOCHAN( | NOCHAN( | NOCHAN( |
| NOCHAN( | UP      | NOCHAN( | DOWN    | UP      | UP      | NOCHAN( | UP      | NOCHAN( |
| NOCHAN( | NOCHAN( | DOWN    | UP      | NOCHAN( | DOWN    | DOWN    | DOWN    | DOWN    |
| DOWN    | NOCHAN( | DOWN    | UP      | DOWN    | NOCHAN( | DOWN    | DOWN    | NOCHAN( |
| NOCHAN( | NOCHAN( | DOWN    | UP      | NOCHAN( | NOCHAN( | DOWN    | DOWN    | DOWN    |
| NOCHAN( | NOCHAN( | DOWN    | DOWN    | NOCHAN( | NOCHAN( | NOCHAN( | DOWN    | NOCHAN( |
| UP      | UP      | UP      | DOWN    | UP      | NOCHAN( | UP      | UP      | UP      |
| NOCHAN( | NOCHAN( | DOWN    | DOWN    | NOCHAN( | NOCHAN( | DOWN    | NOCHAN( | NOCHAN( |
| NOCHAN( | UP      | NOCHAN( | NOCHAN( | NOCHAN( | NOCHAN( | DOWN    | NOCHAN( | NOCHAN( |
| NOCHAN( | DOWN    | NOCHAN( | NOCHAN( | NOCHAN( | NOCHAN( | NOCHAN( | NOCHAN( | DOWN    |
| DOWN    | NOCHAN( | DOWN    | DOWN    | NOCHAN( | NOCHAN( | NOCHAN( | DOWN    | DOWN    |
| NOCHAN( | NOCHAN( | DOWN    | UP      | NOCHAN( | NOCHAN( | NOCHAN( | DOWN    | NOCHAN( |
| NOCHAN( | NOCHAN( | NOCHAN( | NOCHAN( | NOCHAN( | UP      | NOCHAN( | NOCHAN( | NOCHAN( |
| NOCHAN( | NOCHAN( | NOCHAN( | UP      | DOWN    | NOCHAN( | NOCHAN( | NOCHAN( | NOCHAN( |
| NOCHAN( | NOCHAN( | UP      | DOWN    | DOWN    | NOCHAN( | NOCHAN( | NOCHAN( | NOCHAN( |
| NOCHAN( | UP      | DOWN    | NOCHAN( | NOCHAN( | NOCHAN( | DOWN    | NOCHAN( | NOCHAN( |
| UP      | UP      | NOCHAN( | UP      | NOCHAN( | UP      | NOCHAN( | UP      | UP      |
| NOCHAN( | NOCHAN( | UP      | NOCHAN( | NOCHAN( | NOCHAN( | NOCHAN( | DOWN    | NOCHAN( |
| UP      | NOCHAN( | NOCHAN( | NOCHAN( | NOCHAN( | NOCHAN( | NOCHAN( | NOCHAN( | NOCHAN( |
| NOCHAN( | NOCHAN( | DOWN    | UP      | NOCHAN( | NOCHAN( | NOCHAN( | DOWN    | NOCHAN( |
| DOWN    | DOWN    | DOWN    | NOCHAN( | NOCHAN( | DOWN    | DOWN    | DOWN    | DOWN    |
| UP      | NOCHAN( | NOCHAN( | DOWN    | NOCHAN( | NOCHAN( | UP      | NOCHAN( | UP      |
| UP      | UP      | DOWN    | NOCHAN( | UP      | NOCHAN( | NOCHAN( | UP      | UP      |
| DOWN    | NOCHAN( | UP      | NOCHAN( | UP      | NOCHAN( | NOCHAN( | NOCHAN( | NOCHAN( |

| TCGA-B2 | TCGA-BP | TCGA-BP | TCGA-CZ | TCGA-AK | TCGA-B0 | TCGA-BP | TCGA-BP | TCGA-BP |
|---------|---------|---------|---------|---------|---------|---------|---------|---------|
| NOCHANC | DOWN    | DOWN    | DOWN    | NOCHANC | NOCHANC | DOWN    | DOWN    | NOCHANC |
| NOCHANC | NOCHANC | DOWN    | DOWN    | NOCHANC | DOWN    | DOWN    | DOWN    | NOCHANC |
| NOCHANC | DOWN    | DOWN    | DOWN    | NOCHANC | DOWN    | DOWN    | DOWN    | DOWN    |
| NOCHANC | DOWN    | NOCHANC | NOCHANC | NOCHANC | UP      | NOCHANC | NOCHANC | NOCHANC |
| UP      | DOWN    | NOCHANC | NOCHANC | NOCHANC | NOCHANC | DOWN    | UP      | NOCHANC |
| DOWN    | NOCHANC | DOWN    | DOWN    | NOCHANC | DOWN    | DOWN    | NOCHANC | NOCHANC |
| NOCHANC | DOWN    | DOWN    | NOCHANC | DOWN    | DOWN    | NOCHANC | NOCHANC | DOWN    |
| NOCHANC | DOWN    | UP      | NOCHANC | NOCHANC | NOCHANC | NOCHANC | DOWN    | UP      |
| UP      | DOWN    | NOCHANC | NOCHANC | UP      | UP      | UP      | NOCHANC | UP      |
| NOCHANC | DOWN    | DOWN    | DOWN    | NOCHANC | DOWN    | DOWN    | DOWN    | DOWN    |
| UP      | NOCHANC | NOCHANC | NOCHANC | NOCHANC | NOCHANC | NOCHANC | UP      | NOCHANC |
| NOCHANC | DOWN    | NOCHANC | NOCHANC | UP      | NOCHANC | UP      | DOWN    | NOCHANC |
| NOCHANC | NOCHANC | DOWN    | DOWN    | NOCHANC | NOCHANC | NOCHANC | NOCHANC | NOCHANC |
| NOCHANC | DOWN    | NOCHANC | UP      | NOCHANC | NOCHANC | UP      | NOCHANC | NOCHANC |
| NOCHANC | DOWN    | NOCHANC | UP      | NOCHANC | NOCHANC | DOWN    | DOWN    | NOCHANC |
| NOCHANC | NOCHANC | UP      | NOCHANC | NOCHANC | NOCHANC | UP      | NOCHANC | NOCHANC |
| UP      | DOWN    | NOCHANC | DOWN    | NOCHANC | NOCHANC | DOWN    | UP      | NOCHANC |
| NOCHANC | DOWN    | NOCHANC | UP      | NOCHANC | NOCHANC | NOCHANC | NOCHANC | NOCHANC |
| DOWN    | DOWN    | NOCHANC | DOWN    | NOCHANC | NOCHANC | DOWN    | DOWN    | DOWN    |
| DOWN    | DOWN    | NOCHANC | DOWN    | DOWN    | UP      | DOWN    | DOWN    | DOWN    |
| DOWN    | DOWN    | DOWN    | DOWN    | DOWN    | NOCHANC | DOWN    | DOWN    | NOCHANC |
| NOCHANC | DOWN    | NOCHANC | DOWN    | NOCHANC | NOCHANC | NOCHANC | NOCHANC | DOWN    |
| NOCHANC | UP      | NOCHANC | UP      | UP      | UP      | UP      | UP      | UP      |
| NOCHANC | DOWN    | NOCHANC | UP      | NOCHANC | DOWN    | NOCHANC | NOCHANC | DOWN    |
| NOCHANC | NOCHANC | NOCHANC | NOCHANC | NOCHANC | NOCHANC | NOCHANC | NOCHANC | NOCHANC |
| NOCHANC | DOWN    | DOWN    | DOWN    | NOCHANC | NOCHANC | NOCHANC | NOCHANC | NOCHANC |
| NOCHANC | DOWN    | DOWN    | DOWN    | DOWN    | DOWN    | DOWN    | DOWN    | NOCHANC |
| NOCHANC | DOWN    | NOCHANC | DOWN    | NOCHANC | NOCHANC | NOCHANC | NOCHANC | DOWN    |
| NOCHANC | DOWN    | NOCHANC | NOCHANC | DOWN    | NOCHANC | NOCHANC | NOCHANC | NOCHANC |
| DOWN    | UP      | NOCHANC | UP      | DOWN    | NOCHANC | NOCHANC | NOCHANC | NOCHANC |
| NOCHANC | DOWN    | NOCHANC | UP      | UP      | NOCHANC | UP      | NOCHANC | DOWN    |
| NOCHANC | NOCHANC | NOCHANC | DOWN    | NOCHANC | DOWN    | DOWN    | NOCHANC | NOCHANC |
| UP      | NOCHANC | UP      | NOCHANC | NOCHANC | UP      | NOCHANC | UP      | UP      |
| NOCHANC | DOWN    | NOCHANC | UP      | UP      | NOCHANC | NOCHANC | NOCHANC | DOWN    |
| NOCHANC | NOCHANC | NOCHANC | NOCHANC | UP      | UP      | NOCHANC | NOCHANC | NOCHANC |
| NOCHANC | NOCHANC | NOCHANC | DOWN    | NOCHANC | NOCHANC | DOWN    | DOWN    | NOCHANC |
| NOCHANC | DOWN    | NOCHANC | DOWN    | NOCHANC | DOWN    | DOWN    | DOWN    | DOWN    |
| NOCHANC | NOCHANC | NOCHANC | UP      | UP      | NOCHANC | UP      | NOCHANC | NOCHANC |
| NOCHANC | DOWN    | UP      | NOCHANC | DOWN    | NOCHANC | DOWN    | NOCHANC | UP      |
| UP      | DOWN    | NOCHANC | NOCHANC | NOCHANC | NOCHANC | DOWN    | UP      | NOCHANC |

TCGA-B0- TCGA-B0- TCGA-3Z- TCGA-DV TCGA-BP- TCGA-BP- TCGA-BP- TCGA-AK- TCGA-B8-  
NOCHAN( NOCHAN( NOCHAN( DOWN DOWN DOWN NOCHAN( NOCHAN( DOWN  
DOWN DOWN DOWN NOCHAN( NOCHAN( NOCHAN( DOWN DOWN NOCHAN(  
DOWN DOWN DOWN DOWN DOWN DOWN DOWN DOWN NOCHAN(  
UP UP UP NOCHAN( NOCHAN( NOCHAN( NOCHAN( NOCHAN( NOCHAN(  
NOCHAN( UP NOCHAN( NOCHAN( NOCHAN( NOCHAN( NOCHAN( NOCHAN( NOCHAN(  
NOCHAN( DOWN DOWN NOCHAN( NOCHAN( NOCHAN( DOWN NOCHAN( NOCHAN(  
NOCHAN( NOCHAN( DOWN NOCHAN( NOCHAN( NOCHAN( NOCHAN( NOCHAN( DOWN  
NOCHAN( DOWN NOCHAN( NOCHAN( NOCHAN( NOCHAN( NOCHAN( NOCHAN( NOCHAN(  
UP UP UP NOCHAN( NOCHAN( NOCHAN( NOCHAN( NOCHAN( NOCHAN( NOCHAN(  
NOCHAN( DOWN DOWN DOWN NOCHAN( NOCHAN( NOCHAN( NOCHAN( DOWN  
NOCHAN( UP UP NOCHAN( NOCHAN( UP NOCHAN( NOCHAN( NOCHAN(  
NOCHAN( NOCHAN( NOCHAN( NOCHAN( NOCHAN( NOCHAN( NOCHAN( NOCHAN( NOCHAN(  
NOCHAN( NOCHAN( NOCHAN( DOWN NOCHAN( NOCHAN( NOCHAN( NOCHAN( DOWN  
NOCHAN( NOCHAN( UP NOCHAN( NOCHAN( NOCHAN( NOCHAN( NOCHAN( NOCHAN(  
NOCHAN( DOWN NOCHAN( NOCHAN( NOCHAN( NOCHAN( UP DOWN NOCHAN(  
NOCHAN( NOCHAN( UP NOCHAN( NOCHAN( NOCHAN( DOWN UP NOCHAN(  
UP UP NOCHAN( NOCHAN( NOCHAN( NOCHAN( NOCHAN( NOCHAN( NOCHAN( NOCHAN(  
NOCHAN( NOCHAN( NOCHAN( NOCHAN( NOCHAN( UP UP NOCHAN( NOCHAN(  
NOCHAN( DOWN DOWN DOWN DOWN DOWN DOWN NOCHAN( DOWN  
NOCHAN( NOCHAN( DOWN DOWN NOCHAN( DOWN DOWN DOWN DOWN  
NOCHAN( DOWN DOWN DOWN NOCHAN( NOCHAN( NOCHAN( NOCHAN( NOCHAN(  
NOCHAN( NOCHAN( NOCHAN( DOWN NOCHAN( DOWN NOCHAN( NOCHAN( DOWN  
UP UP UP UP UP UP UP UP UP  
NOCHAN( NOCHAN( NOCHAN( NOCHAN( NOCHAN( NOCHAN( NOCHAN( NOCHAN( NOCHAN(  
NOCHAN( NOCHAN( NOCHAN( NOCHAN( NOCHAN( NOCHAN( NOCHAN( NOCHAN( NOCHAN(  
NOCHAN( NOCHAN( NOCHAN( DOWN DOWN NOCHAN( NOCHAN( DOWN NOCHAN(  
DOWN DOWN DOWN DOWN DOWN NOCHAN( NOCHAN( DOWN NOCHAN(  
NOCHAN( DOWN NOCHAN( NOCHAN( NOCHAN( NOCHAN( NOCHAN( NOCHAN( NOCHAN(  
NOCHAN( NOCHAN( NOCHAN( NOCHAN( NOCHAN( UP UP NOCHAN( UP  
NOCHAN( NOCHAN( NOCHAN( NOCHAN( DOWN NOCHAN( NOCHAN( NOCHAN(  
NOCHAN( DOWN NOCHAN( NOCHAN( NOCHAN( NOCHAN( NOCHAN( NOCHAN( NOCHAN(  
UP UP NOCHAN( NOCHAN( NOCHAN( UP UP UP UP NOCHAN(  
NOCHAN( NOCHAN( UP NOCHAN( NOCHAN( NOCHAN( NOCHAN( NOCHAN( NOCHAN(  
NOCHAN( DOWN UP NOCHAN( NOCHAN( NOCHAN( DOWN NOCHAN( UP  
DOWN NOCHAN( NOCHAN( NOCHAN( NOCHAN( NOCHAN( NOCHAN( NOCHAN( NOCHAN(  
NOCHAN( DOWN NOCHAN( DOWN DOWN DOWN DOWN DOWN DOWN DOWN  
NOCHAN( NOCHAN( UP UP UP NOCHAN( NOCHAN( UP NOCHAN(  
NOCHAN( DOWN UP NOCHAN( UP UP UP UP NOCHAN( UP  
NOCHAN( UP NOCHAN( NOCHAN( NOCHAN( UP UP NOCHAN( NOCHAN(

| TCGA-BP- | TCGA-DV | TCGA-B0- | TCGA-CZ- | TCGA-B0- | TCGA-BP- | TCGA-B0- | TCGA-BP- | TCGA-CZ- |
|----------|---------|----------|----------|----------|----------|----------|----------|----------|
| DOWN     | NOCHAN( | DOWN     | DOWN     | DOWN     | NOCHAN(  | DOWN     | NOCHAN(  | DOWN     |
| DOWN     | DOWN    | NOCHAN(  | DOWN     | NOCHAN(  | DOWN     | NOCHAN(  | DOWN     | DOWN     |
| DOWN     | DOWN    | DOWN     | DOWN     | DOWN     | NOCHAN(  | DOWN     | NOCHAN(  | DOWN     |
| UP       | NOCHAN( | NOCHAN(  | NOCHAN(  | NOCHAN(  | NOCHAN(  | NOCHAN(  | NOCHAN(  | DOWN     |
| NOCHAN(  | NOCHAN( | NOCHAN(  | NOCHAN(  | NOCHAN(  | NOCHAN(  | DOWN     | NOCHAN(  | NOCHAN(  |
| DOWN     | DOWN    | NOCHAN(  | NOCHAN(  | DOWN     | DOWN     | DOWN     | NOCHAN(  | DOWN     |
| DOWN     | NOCHAN( | NOCHAN(  | DOWN     | DOWN     | NOCHAN(  | NOCHAN(  | NOCHAN(  | NOCHAN(  |
| NOCHAN(  | NOCHAN( | NOCHAN(  | NOCHAN(  | NOCHAN(  | NOCHAN(  | DOWN     | NOCHAN(  | DOWN     |
| UP       | UP      | NOCHAN(  | UP       | UP       | NOCHAN(  | UP       | NOCHAN(  | NOCHAN(  |
| DOWN     | DOWN    | NOCHAN(  | NOCHAN(  | DOWN     | NOCHAN(  | DOWN     | NOCHAN(  | NOCHAN(  |
| NOCHAN(  | NOCHAN( | UP       | NOCHAN(  | NOCHAN(  | UP       | NOCHAN(  | NOCHAN(  | NOCHAN(  |
| NOCHAN(  | UP      | NOCHAN(  | NOCHAN(  | NOCHAN(  | NOCHAN(  | UP       | NOCHAN(  | NOCHAN(  |
| NOCHAN(  | NOCHAN( | NOCHAN(  | NOCHAN(  | DOWN     | NOCHAN(  | NOCHAN(  | NOCHAN(  | NOCHAN(  |
| NOCHAN(  | UP      | NOCHAN(  | UP       | NOCHAN(  | NOCHAN(  | UP       | NOCHAN(  | NOCHAN(  |
| DOWN     | NOCHAN( | NOCHAN(  | NOCHAN(  | NOCHAN(  | NOCHAN(  | NOCHAN(  | NOCHAN(  | DOWN     |
| UP       | NOCHAN( | NOCHAN(  | NOCHAN(  | NOCHAN(  | NOCHAN(  | UP       | NOCHAN(  | UP       |
| NOCHAN(  | NOCHAN( | NOCHAN(  | NOCHAN(  | NOCHAN(  | NOCHAN(  | DOWN     | NOCHAN(  | NOCHAN(  |
| NOCHAN(  | NOCHAN( | NOCHAN(  | NOCHAN(  | UP       | UP       | NOCHAN(  | UP       | NOCHAN(  |
| DOWN     | NOCHAN( | NOCHAN(  | DOWN     | DOWN     | NOCHAN(  | DOWN     | NOCHAN(  | NOCHAN(  |
| DOWN     | DOWN    | NOCHAN(  | DOWN     | NOCHAN(  | DOWN     | DOWN     | DOWN     | DOWN     |
| DOWN     | DOWN    | NOCHAN(  | NOCHAN(  | DOWN     | NOCHAN(  | DOWN     | NOCHAN(  | DOWN     |
| NOCHAN(  | NOCHAN( | NOCHAN(  | NOCHAN(  | DOWN     | NOCHAN(  | NOCHAN(  | NOCHAN(  | NOCHAN(  |
| UP       | UP      | UP       | UP       | UP       | UP       | UP       | UP       | UP       |
| NOCHAN(  | DOWN    | NOCHAN(  | NOCHAN(  | NOCHAN(  | NOCHAN(  | NOCHAN(  | NOCHAN(  | NOCHAN(  |
| NOCHAN(  | NOCHAN( | NOCHAN(  | DOWN     | NOCHAN(  | NOCHAN(  | NOCHAN(  | NOCHAN(  | NOCHAN(  |
| NOCHAN(  | NOCHAN( | NOCHAN(  | NOCHAN(  | NOCHAN(  | NOCHAN(  | DOWN     | NOCHAN(  | DOWN     |
| DOWN     | DOWN    | DOWN     | DOWN     | DOWN     | DOWN     | DOWN     | DOWN     | DOWN     |
| NOCHAN(  | NOCHAN( | NOCHAN(  | NOCHAN(  | NOCHAN(  | NOCHAN(  | NOCHAN(  | NOCHAN(  | NOCHAN(  |
| NOCHAN(  | DOWN    | NOCHAN(  | NOCHAN(  | NOCHAN(  | NOCHAN(  | NOCHAN(  | NOCHAN(  | NOCHAN(  |
| NOCHAN(  | NOCHAN( | NOCHAN(  | NOCHAN(  | NOCHAN(  | DOWN     | UP       | NOCHAN(  | NOCHAN(  |
| UP       | UP      | NOCHAN(  | NOCHAN(  | NOCHAN(  | DOWN     | UP       | NOCHAN(  | NOCHAN(  |
| DOWN     | DOWN    | NOCHAN(  | NOCHAN(  | NOCHAN(  | NOCHAN(  | DOWN     | NOCHAN(  | NOCHAN(  |
| NOCHAN(  | NOCHAN( | UP       | NOCHAN(  | UP       | UP       | NOCHAN(  | UP       | NOCHAN(  |
| NOCHAN(  | UP      | NOCHAN(  | NOCHAN(  | NOCHAN(  | NOCHAN(  | UP       | NOCHAN(  | NOCHAN(  |
| NOCHAN(  | UP      | UP       | UP       | NOCHAN(  | NOCHAN(  | UP       | NOCHAN(  | NOCHAN(  |
| NOCHAN(  | DOWN    | NOCHAN(  | NOCHAN(  | DOWN     | NOCHAN(  | DOWN     | NOCHAN(  | NOCHAN(  |
| DOWN     | DOWN    | DOWN     | DOWN     | DOWN     | DOWN     | DOWN     | DOWN     | DOWN     |
| NOCHAN(  | UP      | UP       | NOCHAN(  | NOCHAN(  | UP       | UP       | UP       | UP       |
| NOCHAN(  | NOCHAN( | NOCHAN(  | NOCHAN(  | UP       | UP       | NOCHAN(  | UP       | UP       |
| UP       | NOCHAN( | NOCHAN(  | NOCHAN(  | UP       | UP       | NOCHAN(  | UP       | NOCHAN(  |

| TCGA-BP- | TCGA-CZ- | TCGA-CJ- | TCGA-CJ- | TCGA-B0- | TCGA-BP- | TCGA-CJ- | TCGA-B0- | TCGA-CJ- |
|----------|----------|----------|----------|----------|----------|----------|----------|----------|
| DOWN     | DOWN     | DOWN     | NOCHAN(  | NOCHAN(  | NOCHAN(  | DOWN     | DOWN     | DOWN     |
| DOWN     | DOWN     | NOCHAN(  | NOCHAN(  | DOWN     | NOCHAN(  | DOWN     | DOWN     | DOWN     |
| DOWN     | DOWN     | DOWN     | DOWN     | DOWN     | DOWN     | DOWN     | DOWN     | DOWN     |
| NOCHAN(  | NOCHAN(  | NOCHAN(  | NOCHAN(  | NOCHAN(  | UP       | UP       | NOCHAN(  | UP       |
| NOCHAN(  | NOCHAN(  | NOCHAN(  | NOCHAN(  | NOCHAN(  | NOCHAN(  | NOCHAN(  | NOCHAN(  | NOCHAN(  |
| DOWN     | DOWN     | DOWN     | NOCHAN(  | DOWN     | DOWN     | DOWN     | DOWN     | DOWN     |
| NOCHAN(  | DOWN     | NOCHAN(  | NOCHAN(  | DOWN     | NOCHAN(  | DOWN     | DOWN     | NOCHAN(  |
| NOCHAN(  | NOCHAN(  | NOCHAN(  | NOCHAN(  | NOCHAN(  | NOCHAN(  | NOCHAN(  | UP       | NOCHAN(  |
| NOCHAN(  | UP       | NOCHAN(  | NOCHAN(  | UP       | UP       | UP       | NOCHAN(  | UP       |
| NOCHAN(  | DOWN     | DOWN     | NOCHAN(  | NOCHAN(  | DOWN     | DOWN     | NOCHAN(  | DOWN     |
| NOCHAN(  | NOCHAN(  | NOCHAN(  | NOCHAN(  | UP       | NOCHAN(  | UP       | NOCHAN(  | NOCHAN(  |
| NOCHAN(  | NOCHAN(  | NOCHAN(  | NOCHAN(  | NOCHAN(  | NOCHAN(  | NOCHAN(  | DOWN     | NOCHAN(  |
| NOCHAN(  | NOCHAN(  | NOCHAN(  | DOWN     | NOCHAN(  | NOCHAN(  | NOCHAN(  | NOCHAN(  | NOCHAN(  |
| NOCHAN(  | NOCHAN(  | NOCHAN(  | NOCHAN(  | NOCHAN(  | UP       | NOCHAN(  | NOCHAN(  | UP       |
| NOCHAN(  | NOCHAN(  | NOCHAN(  | NOCHAN(  | NOCHAN(  | NOCHAN(  | NOCHAN(  | NOCHAN(  | NOCHAN(  |
| NOCHAN(  | UP       | NOCHAN(  | NOCHAN(  | NOCHAN(  | NOCHAN(  | NOCHAN(  | NOCHAN(  | NOCHAN(  |
| NOCHAN(  | NOCHAN(  | NOCHAN(  | NOCHAN(  | NOCHAN(  | NOCHAN(  | NOCHAN(  | NOCHAN(  | NOCHAN(  |
| NOCHAN(  | NOCHAN(  | UP       | UP       | UP       | UP       | NOCHAN(  | NOCHAN(  | NOCHAN(  |
| DOWN     | NOCHAN(  | DOWN     | DOWN     | NOCHAN(  | DOWN     | DOWN     | DOWN     | DOWN     |
| DOWN     | DOWN     | NOCHAN(  | DOWN     | DOWN     | DOWN     | DOWN     | DOWN     | DOWN     |
| DOWN     | DOWN     | DOWN     | DOWN     | DOWN     | DOWN     | DOWN     | NOCHAN(  | DOWN     |
| NOCHAN(  | NOCHAN(  | NOCHAN(  | DOWN     | NOCHAN(  | DOWN     | DOWN     | DOWN     | NOCHAN(  |
| UP       | UP       | UP       | UP       | UP       | UP       | UP       | UP       | UP       |
| DOWN     | DOWN     | NOCHAN(  | NOCHAN(  | DOWN     | NOCHAN(  | DOWN     | NOCHAN(  | DOWN     |
| NOCHAN(  | NOCHAN(  | NOCHAN(  | DOWN     | NOCHAN(  | NOCHAN(  | NOCHAN(  | NOCHAN(  | DOWN     |
| NOCHAN(  | NOCHAN(  | NOCHAN(  | NOCHAN(  | NOCHAN(  | NOCHAN(  | NOCHAN(  | NOCHAN(  | DOWN     |
| NOCHAN(  | DOWN     | NOCHAN(  | NOCHAN(  | DOWN     | NOCHAN(  | DOWN     | DOWN     | DOWN     |
| NOCHAN(  | NOCHAN(  | NOCHAN(  | NOCHAN(  | NOCHAN(  | NOCHAN(  | DOWN     | NOCHAN(  | DOWN     |
| NOCHAN(  | NOCHAN(  | NOCHAN(  | UP       | NOCHAN(  | NOCHAN(  | NOCHAN(  | NOCHAN(  | NOCHAN(  |
| NOCHAN(  | NOCHAN(  | NOCHAN(  | NOCHAN(  | NOCHAN(  | UP       | NOCHAN(  | NOCHAN(  | NOCHAN(  |
| DOWN     | UP       | NOCHAN(  | NOCHAN(  | NOCHAN(  | NOCHAN(  | NOCHAN(  | NOCHAN(  | UP       |
| NOCHAN(  | DOWN     | NOCHAN(  | NOCHAN(  | NOCHAN(  | DOWN     | NOCHAN(  | NOCHAN(  | DOWN     |
| NOCHAN(  | NOCHAN(  | UP       | NOCHAN(  | NOCHAN(  | NOCHAN(  | NOCHAN(  | NOCHAN(  | NOCHAN(  |
| NOCHAN(  | NOCHAN(  | NOCHAN(  | NOCHAN(  | NOCHAN(  | NOCHAN(  | NOCHAN(  | NOCHAN(  | UP       |
| UP       | UP       | NOCHAN(  | NOCHAN(  | NOCHAN(  | NOCHAN(  | UP       | NOCHAN(  | DOWN     |
| NOCHAN(  | NOCHAN(  | DOWN     | NOCHAN(  | NOCHAN(  | DOWN     | DOWN     | NOCHAN(  | NOCHAN(  |
| DOWN     | DOWN     | DOWN     | NOCHAN(  | DOWN     | DOWN     | DOWN     | DOWN     | DOWN     |
| NOCHAN(  | NOCHAN(  | NOCHAN(  | NOCHAN(  | NOCHAN(  | UP       | UP       | NOCHAN(  | UP       |
| UP       | NOCHAN(  | NOCHAN(  | UP       | UP       | NOCHAN(  | NOCHAN(  | NOCHAN(  | DOWN     |
| NOCHAN(  | DOWN     | UP       | UP       | NOCHAN(  | UP       | UP       | NOCHAN(  | NOCHAN(  |



TCGA-CZ- TCGA-AK- TCGA-AK- TCGA-B0- TCGA-B0- TCGA-CJ- TCGA-B0- TCGA-CZ- TCGA-CJ-  
DOWN NOCHANC DOWN NOCHANC DOWN DOWN NOCHANC DOWN NOCHANC  
NOCHANC NOCHANC DOWN NOCHANC DOWN DOWN DOWN DOWN DOWN  
DOWN NOCHANC DOWN DOWN DOWN DOWN DOWN DOWN DOWN  
DOWN NOCHANC UP NOCHANC NOCHANC NOCHANC UP NOCHANC NOCHANC  
NOCHANC DOWN NOCHANC NOCHANC DOWN DOWN NOCHANC NOCHANC NOCHANC  
DOWN UP DOWN DOWN DOWN DOWN DOWN DOWN DOWN DOWN  
NOCHANC UP DOWN DOWN DOWN NOCHANC DOWN NOCHANC DOWN  
NOCHANC NOCHANC NOCHANC UP DOWN UP NOCHANC NOCHANC NOCHANC  
DOWN NOCHANC UP NOCHANC NOCHANC UP UP NOCHANC UP  
NOCHANC NOCHANC DOWN DOWN DOWN DOWN DOWN NOCHANC NOCHANC  
NOCHANC NOCHANC UP NOCHANC NOCHANC NOCHANC UP NOCHANC NOCHANC  
DOWN UP NOCHANC NOCHANC NOCHANC NOCHANC NOCHANC NOCHANC NOCHANC  
NOCHANC DOWN NOCHANC NOCHANC NOCHANC NOCHANC NOCHANC NOCHANC NOCHANC  
DOWN UP NOCHANC UP NOCHANC UP NOCHANC UP NOCHANC NOCHANC  
NOCHANC NOCHANC NOCHANC NOCHANC DOWN DOWN NOCHANC NOCHANC NOCHANC  
NOCHANC UP NOCHANC NOCHANC NOCHANC NOCHANC NOCHANC UP NOCHANC  
UP DOWN NOCHANC NOCHANC NOCHANC NOCHANC UP UP NOCHANC NOCHANC  
NOCHANC UP DOWN DOWN DOWN DOWN DOWN DOWN DOWN NOCHANC  
DOWN UP DOWN DOWN DOWN DOWN NOCHANC NOCHANC DOWN  
NOCHANC UP DOWN DOWN DOWN DOWN DOWN DOWN DOWN DOWN  
NOCHANC DOWN NOCHANC NOCHANC NOCHANC DOWN DOWN NOCHANC NOCHANC  
UP DOWN UP UP UP UP UP UP UP UP  
NOCHANC NOCHANC DOWN DOWN DOWN DOWN NOCHANC NOCHANC NOCHANC  
DOWN NOCHANC NOCHANC NOCHANC DOWN NOCHANC NOCHANC NOCHANC NOCHANC  
DOWN NOCHANC NOCHANC NOCHANC DOWN DOWN NOCHANC NOCHANC NOCHANC  
NOCHANC DOWN DOWN NOCHANC DOWN DOWN DOWN DOWN DOWN NOCHANC  
NOCHANC UP DOWN NOCHANC DOWN NOCHANC NOCHANC NOCHANC NOCHANC  
NOCHANC UP NOCHANC NOCHANC NOCHANC NOCHANC UP NOCHANC NOCHANC  
NOCHANC UP DOWN NOCHANC DOWN NOCHANC NOCHANC NOCHANC NOCHANC  
NOCHANC DOWN UP NOCHANC UP UP NOCHANC NOCHANC NOCHANC  
NOCHANC NOCHANC DOWN DOWN DOWN DOWN NOCHANC NOCHANC NOCHANC  
NOCHANC DOWN NOCHANC NOCHANC NOCHANC NOCHANC UP UP NOCHANC  
NOCHANC NOCHANC NOCHANC NOCHANC UP UP NOCHANC NOCHANC NOCHANC  
UP NOCHANC DOWN NOCHANC NOCHANC NOCHANC NOCHANC UP UP  
DOWN UP DOWN NOCHANC DOWN NOCHANC NOCHANC NOCHANC NOCHANC  
DOWN DOWN NOCHANC DOWN DOWN DOWN DOWN DOWN DOWN DOWN  
UP UP NOCHANC NOCHANC NOCHANC NOCHANC NOCHANC UP NOCHANC  
NOCHANC UP DOWN NOCHANC DOWN NOCHANC NOCHANC UP UP  
NOCHANC NOCHANC NOCHANC NOCHANC DOWN NOCHANC UP NOCHANC NOCHANC

TCGA-BP- TCGA-B0- TCGA-B0- TCGA-B8- TCGA-CJ- TCGA-BP- TCGA-BP- TCGA-A3- TCGA-A3-  
DOWN DOWN NOCHAN( DOWN DOWN NOCHAN( DOWN NOCHAN( DOWN  
NOCHAN( NOCHAN( NOCHAN( NOCHAN( DOWN DOWN NOCHAN( DOWN NOCHAN(  
DOWN DOWN DOWN DOWN DOWN DOWN DOWN DOWN DOWN  
NOCHAN( NOCHAN( UP NOCHAN( UP NOCHAN( DOWN NOCHAN( NOCHAN(  
NOCHAN( NOCHAN( NOCHAN( NOCHAN( NOCHAN( UP NOCHAN( NOCHAN( NOCHAN(  
NOCHAN( NOCHAN( NOCHAN( DOWN DOWN DOWN DOWN NOCHAN( DOWN  
DOWN NOCHAN( DOWN NOCHAN( DOWN NOCHAN( DOWN UP DOWN  
UP NOCHAN( NOCHAN( UP NOCHAN( NOCHAN( NOCHAN( NOCHAN( NOCHAN(  
NOCHAN( UP UP NOCHAN( UP UP NOCHAN( NOCHAN( UP  
DOWN NOCHAN( NOCHAN( NOCHAN( DOWN DOWN DOWN DOWN DOWN  
NOCHAN( NOCHAN( NOCHAN( NOCHAN( NOCHAN( NOCHAN( NOCHAN( NOCHAN(  
NOCHAN( NOCHAN( NOCHAN( NOCHAN( NOCHAN( NOCHAN( NOCHAN( NOCHAN(  
DOWN NOCHAN( NOCHAN( NOCHAN( NOCHAN( NOCHAN( NOCHAN( NOCHAN(  
NOCHAN( NOCHAN( UP NOCHAN( NOCHAN( UP DOWN NOCHAN( NOCHAN(  
NOCHAN( NOCHAN( NOCHAN( NOCHAN( NOCHAN( NOCHAN( NOCHAN( NOCHAN(  
NOCHAN( NOCHAN( NOCHAN( NOCHAN( NOCHAN( NOCHAN( NOCHAN( NOCHAN(  
NOCHAN( NOCHAN( NOCHAN( NOCHAN( NOCHAN( NOCHAN( NOCHAN( NOCHAN(  
DOWN NOCHAN( DOWN DOWN NOCHAN( DOWN DOWN NOCHAN( DOWN  
DOWN NOCHAN( DOWN DOWN DOWN DOWN DOWN NOCHAN( DOWN  
DOWN NOCHAN( NOCHAN( NOCHAN( DOWN DOWN DOWN NOCHAN( NOCHAN(  
DOWN NOCHAN( NOCHAN( NOCHAN( NOCHAN( NOCHAN( NOCHAN( DOWN DOWN  
UP UP NOCHAN( UP NOCHAN( UP UP NOCHAN( NOCHAN( NOCHAN(  
NOCHAN( DOWN NOCHAN( NOCHAN( DOWN NOCHAN( DOWN NOCHAN( DOWN  
NOCHAN( NOCHAN( NOCHAN( NOCHAN( NOCHAN( NOCHAN( NOCHAN( NOCHAN(  
DOWN NOCHAN( NOCHAN( NOCHAN( NOCHAN( NOCHAN( NOCHAN( NOCHAN(  
DOWN DOWN DOWN DOWN NOCHAN( DOWN DOWN NOCHAN( DOWN  
NOCHAN( NOCHAN( NOCHAN( NOCHAN( NOCHAN( NOCHAN( UP NOCHAN( NOCHAN(  
DOWN UP UP UP NOCHAN( NOCHAN( NOCHAN( NOCHAN( UP  
NOCHAN( NOCHAN( UP NOCHAN( NOCHAN( UP DOWN NOCHAN( NOCHAN(

| TCGA-B0- | TCGA-B4- | TCGA-B0- | TCGA-BP- | TCGA-BP- | TCGA-BP- | TCGA-B0- | TCGA-A3- | TCGA-CJ- |
|----------|----------|----------|----------|----------|----------|----------|----------|----------|
| DOWN     | DOWN     | DOWN     | NOCHAN(  | DOWN     | DOWN     | NOCHAN(  | NOCHAN(  | UP       |
| DOWN     | DOWN     | NOCHAN(  | DOWN     | NOCHAN(  | NOCHAN(  | DOWN     | DOWN     | DOWN     |
| DOWN     | DOWN     | NOCHAN(  | DOWN     | DOWN     | DOWN     | NOCHAN(  | DOWN     | DOWN     |
| UP       | NOCHAN(  | NOCHAN(  | UP       | UP       | NOCHAN(  | NOCHAN(  | UP       | NOCHAN(  |
| DOWN     | NOCHAN(  | NOCHAN(  | UP       | NOCHAN(  | NOCHAN(  | NOCHAN(  | NOCHAN(  | NOCHAN(  |
| DOWN     | NOCHAN(  | DOWN     | DOWN     | NOCHAN(  | NOCHAN(  | DOWN     | DOWN     | DOWN     |
| DOWN     | DOWN     | DOWN     | NOCHAN(  | DOWN     | NOCHAN(  | NOCHAN(  | NOCHAN(  | DOWN     |
| NOCHAN(  | NOCHAN(  | UP       | NOCHAN(  | NOCHAN(  | NOCHAN(  | NOCHAN(  | NOCHAN(  | UP       |
| UP       | NOCHAN(  | UP       | UP       | UP       | NOCHAN(  | NOCHAN(  | UP       | UP       |
| DOWN     | DOWN     | NOCHAN(  | DOWN     | DOWN     | DOWN     | NOCHAN(  | NOCHAN(  | NOCHAN(  |
| NOCHAN(  | NOCHAN(  | NOCHAN(  | UP       | UP       | NOCHAN(  | UP       | NOCHAN(  | NOCHAN(  |
| NOCHAN(  | DOWN     | NOCHAN(  | DOWN     | NOCHAN(  | DOWN     | NOCHAN(  | NOCHAN(  | NOCHAN(  |
| NOCHAN(  | DOWN     | NOCHAN(  | NOCHAN(  | NOCHAN(  | NOCHAN(  | NOCHAN(  | NOCHAN(  | NOCHAN(  |
| UP       | NOCHAN(  | NOCHAN(  | NOCHAN(  | NOCHAN(  | NOCHAN(  | NOCHAN(  | NOCHAN(  | UP       |
| DOWN     | NOCHAN(  | NOCHAN(  | NOCHAN(  | NOCHAN(  | NOCHAN(  | NOCHAN(  | NOCHAN(  | NOCHAN(  |
| UP       | NOCHAN(  | NOCHAN(  | NOCHAN(  | NOCHAN(  | NOCHAN(  | NOCHAN(  | NOCHAN(  | NOCHAN(  |
| NOCHAN(  | NOCHAN(  | NOCHAN(  | NOCHAN(  | NOCHAN(  | NOCHAN(  | NOCHAN(  | NOCHAN(  | NOCHAN(  |
| NOCHAN(  | NOCHAN(  | UP       | UP       | NOCHAN(  | UP       | NOCHAN(  | NOCHAN(  | NOCHAN(  |
| DOWN     | NOCHAN(  | DOWN     | DOWN     | DOWN     | DOWN     | DOWN     | DOWN     | NOCHAN(  |
| DOWN     | NOCHAN(  | DOWN     | NOCHAN(  | DOWN     | DOWN     | NOCHAN(  | DOWN     | NOCHAN(  |
| DOWN     | NOCHAN(  | DOWN     | DOWN     | DOWN     | DOWN     | NOCHAN(  | DOWN     | DOWN     |
| NOCHAN(  | DOWN     | NOCHAN(  | NOCHAN(  | NOCHAN(  | DOWN     | DOWN     | NOCHAN(  | NOCHAN(  |
| UP       | NOCHAN(  | UP       | UP       | UP       | NOCHAN(  | UP       | UP       | UP       |
| DOWN     | NOCHAN(  | NOCHAN(  | NOCHAN(  | DOWN     | UP       | NOCHAN(  | NOCHAN(  | DOWN     |
| NOCHAN(  | NOCHAN(  | NOCHAN(  | NOCHAN(  | NOCHAN(  | NOCHAN(  | NOCHAN(  | NOCHAN(  | DOWN     |
| NOCHAN(  | NOCHAN(  | NOCHAN(  | NOCHAN(  | NOCHAN(  | NOCHAN(  | NOCHAN(  | NOCHAN(  | NOCHAN(  |
| DOWN     | DOWN     | NOCHAN(  | DOWN     | DOWN     | DOWN     | NOCHAN(  | NOCHAN(  | NOCHAN(  |
| NOCHAN(  | NOCHAN(  | NOCHAN(  | NOCHAN(  | NOCHAN(  | NOCHAN(  | NOCHAN(  | NOCHAN(  | NOCHAN(  |
| NOCHAN(  | UP       | UP       | NOCHAN(  | UP       | NOCHAN(  | NOCHAN(  | UP       | NOCHAN(  |
| NOCHAN(  | NOCHAN(  | NOCHAN(  | NOCHAN(  | NOCHAN(  | NOCHAN(  | DOWN     | DOWN     | NOCHAN(  |
| UP       | DOWN     | NOCHAN(  | NOCHAN(  | NOCHAN(  | NOCHAN(  | DOWN     | NOCHAN(  | NOCHAN(  |
| DOWN     | NOCHAN(  | NOCHAN(  | NOCHAN(  | NOCHAN(  | NOCHAN(  | NOCHAN(  | NOCHAN(  | NOCHAN(  |
| NOCHAN(  | UP       | NOCHAN(  | NOCHAN(  | NOCHAN(  | UP       | UP       | NOCHAN(  | NOCHAN(  |
| NOCHAN(  | NOCHAN(  | NOCHAN(  | NOCHAN(  | NOCHAN(  | DOWN     | NOCHAN(  | NOCHAN(  | NOCHAN(  |
| UP       | NOCHAN(  | NOCHAN(  | NOCHAN(  | UP       | NOCHAN(  | DOWN     | NOCHAN(  | DOWN     |
| NOCHAN(  | NOCHAN(  | NOCHAN(  | NOCHAN(  | NOCHAN(  | NOCHAN(  | NOCHAN(  | NOCHAN(  | UP       |
| DOWN     | NOCHAN(  | DOWN     | DOWN     | DOWN     | NOCHAN(  | DOWN     | DOWN     | NOCHAN(  |
| NOCHAN(  | NOCHAN(  | NOCHAN(  | NOCHAN(  | NOCHAN(  | NOCHAN(  | NOCHAN(  | NOCHAN(  | UP       |
| UP       | UP       | NOCHAN(  | NOCHAN(  | NOCHAN(  | UP       | UP       | UP       | NOCHAN(  |
| NOCHAN(  | NOCHAN(  | NOCHAN(  | UP       | UP       | UP       | UP       | UP       | UP       |

TCGA-B0- TCGA-CZ- TCGA-CW TCGA-B4- TCGA-A3- TCGA-B0- TCGA-CJ- TCGA-BP- TCGA-CJ-  
NOCHAN( DOWN DOWN NOCHAN( NOCHAN( DOWN DOWN NOCHAN( DOWN  
DOWN NOCHAN( NOCHAN( NOCHAN( NOCHAN( NOCHAN( NOCHAN( DOWN NOCHAN(  
DOWN NOCHAN( DOWN NOCHAN( DOWN NOCHAN( DOWN DOWN DOWN  
NOCHAN( UP NOCHAN( NOCHAN( NOCHAN( NOCHAN( NOCHAN( NOCHAN( NOCHAN( NOCHAN(  
NOCHAN( NOCHAN( NOCHAN( NOCHAN( NOCHAN( NOCHAN( NOCHAN( NOCHAN( NOCHAN(  
DOWN NOCHAN( DOWN NOCHAN( NOCHAN( NOCHAN( NOCHAN( NOCHAN( DOWN NOCHAN(  
NOCHAN( NOCHAN( NOCHAN( NOCHAN( NOCHAN( DOWN DOWN NOCHAN( NOCHAN(  
NOCHAN( NOCHAN( NOCHAN( NOCHAN( NOCHAN( UP UP DOWN NOCHAN(  
NOCHAN( NOCHAN( NOCHAN( NOCHAN( NOCHAN( UP UP NOCHAN( NOCHAN(  
DOWN NOCHAN( NOCHAN( NOCHAN( NOCHAN( DOWN DOWN NOCHAN( DOWN  
NOCHAN( NOCHAN( NOCHAN( NOCHAN( NOCHAN( NOCHAN( NOCHAN( NOCHAN( NOCHAN(  
NOCHAN( NOCHAN( NOCHAN( NOCHAN( NOCHAN( NOCHAN( NOCHAN( NOCHAN( NOCHAN(  
NOCHAN( NOCHAN( UP NOCHAN( NOCHAN( UP NOCHAN( DOWN NOCHAN(  
NOCHAN( NOCHAN( NOCHAN( NOCHAN( NOCHAN( NOCHAN( NOCHAN( NOCHAN( NOCHAN(  
NOCHAN( NOCHAN( DOWN NOCHAN( NOCHAN( NOCHAN( DOWN UP NOCHAN(  
UP UP NOCHAN( NOCHAN( NOCHAN( NOCHAN( NOCHAN( NOCHAN( UP  
NOCHAN( DOWN DOWN NOCHAN( NOCHAN( DOWN DOWN DOWN DOWN  
DOWN DOWN DOWN DOWN NOCHAN( UP DOWN NOCHAN( NOCHAN(  
DOWN NOCHAN( DOWN DOWN NOCHAN( DOWN DOWN DOWN DOWN  
NOCHAN( DOWN NOCHAN( NOCHAN( NOCHAN( DOWN NOCHAN( NOCHAN( DOWN  
UP NOCHAN( UP UP UP UP UP UP UP UP  
NOCHAN( NOCHAN( DOWN UP NOCHAN( NOCHAN( NOCHAN( NOCHAN( NOCHAN(  
DOWN NOCHAN( NOCHAN( NOCHAN( NOCHAN( NOCHAN( NOCHAN( NOCHAN( NOCHAN(  
DOWN NOCHAN( NOCHAN( NOCHAN( NOCHAN( NOCHAN( NOCHAN( NOCHAN( NOCHAN(  
DOWN NOCHAN( NOCHAN( DOWN DOWN NOCHAN( DOWN DOWN NOCHAN(  
NOCHAN( NOCHAN( NOCHAN( NOCHAN( NOCHAN( NOCHAN( NOCHAN( DOWN NOCHAN(  
NOCHAN( UP NOCHAN( NOCHAN( NOCHAN( NOCHAN( UP NOCHAN( NOCHAN( UP  
DOWN NOCHAN( UP NOCHAN( NOCHAN( NOCHAN( NOCHAN( NOCHAN( NOCHAN(  
NOCHAN( NOCHAN( NOCHAN( NOCHAN( NOCHAN( NOCHAN( NOCHAN( NOCHAN(  
UP UP UP UP UP NOCHAN( NOCHAN( UP UP  
NOCHAN( NOCHAN( NOCHAN( NOCHAN( NOCHAN( NOCHAN( NOCHAN( NOCHAN(  
NOCHAN( NOCHAN( NOCHAN( NOCHAN( UP NOCHAN( NOCHAN( NOCHAN( NOCHAN(  
DOWN NOCHAN( NOCHAN( NOCHAN( NOCHAN( DOWN NOCHAN( NOCHAN( NOCHAN(  
DOWN DOWN DOWN NOCHAN( NOCHAN( DOWN DOWN DOWN DOWN  
NOCHAN( UP UP UP UP NOCHAN( UP NOCHAN( NOCHAN(  
UP NOCHAN( NOCHAN( UP UP NOCHAN( NOCHAN( NOCHAN( UP  
NOCHAN( NOCHAN( NOCHAN( NOCHAN( UP NOCHAN( NOCHAN( UP UP

| TCGA-CZ- | TCGA-B0- | TCGA-CJ- | TCGA-A3- | TCGA-CJ- | TCGA-CZ- | TCGA-B8- | TCGA-BP- | TCGA-B0- |
|----------|----------|----------|----------|----------|----------|----------|----------|----------|
| NOCHANC  | DOWN     | DOWN     | NOCHANC  | NOCHANC  | DOWN     | NOCHANC  | NOCHANC  | DOWN     |
| DOWN     | NOCHANC  | DOWN     | NOCHANC  | NOCHANC  | DOWN     | NOCHANC  | NOCHANC  | NOCHANC  |
| DOWN     | DOWN     | DOWN     | DOWN     | DOWN     | DOWN     | DOWN     | NOCHANC  | DOWN     |
| NOCHANC  | NOCHANC  | UP       | NOCHANC  | NOCHANC  | UP       | NOCHANC  | NOCHANC  | NOCHANC  |
| NOCHANC  | NOCHANC  | NOCHANC  | NOCHANC  | NOCHANC  | NOCHANC  | NOCHANC  | NOCHANC  | UP       |
| DOWN     | NOCHANC  | DOWN     | NOCHANC  | DOWN     | DOWN     | DOWN     | UP       | DOWN     |
| NOCHANC  | NOCHANC  | NOCHANC  | NOCHANC  | NOCHANC  | NOCHANC  | NOCHANC  | UP       | DOWN     |
| UP       | NOCHANC  | NOCHANC  | NOCHANC  | NOCHANC  | NOCHANC  | NOCHANC  | NOCHANC  | NOCHANC  |
| UP       | NOCHANC  | UP       | NOCHANC  | NOCHANC  | UP       | NOCHANC  | NOCHANC  | UP       |
| NOCHANC  | DOWN     | DOWN     | NOCHANC  | DOWN     | DOWN     | NOCHANC  | NOCHANC  | DOWN     |
| NOCHANC  | NOCHANC  | NOCHANC  | UP       | NOCHANC  | NOCHANC  | NOCHANC  | NOCHANC  | NOCHANC  |
| NOCHANC  | DOWN     | NOCHANC  | NOCHANC  | NOCHANC  | NOCHANC  | DOWN     | NOCHANC  | NOCHANC  |
| NOCHANC  | NOCHANC  | NOCHANC  | NOCHANC  | NOCHANC  | NOCHANC  | NOCHANC  | NOCHANC  | DOWN     |
| NOCHANC  | NOCHANC  | NOCHANC  | NOCHANC  | NOCHANC  | UP       | NOCHANC  | UP       | NOCHANC  |
| NOCHANC  | UP       | NOCHANC  | NOCHANC  | NOCHANC  | NOCHANC  | NOCHANC  | NOCHANC  | NOCHANC  |
| NOCHANC  | NOCHANC  | NOCHANC  | NOCHANC  | NOCHANC  | UP       | NOCHANC  | NOCHANC  | NOCHANC  |
| NOCHANC  | NOCHANC  | NOCHANC  | UP       | NOCHANC  | DOWN     | NOCHANC  | NOCHANC  | NOCHANC  |
| NOCHANC  | UP       | NOCHANC  | NOCHANC  | NOCHANC  | NOCHANC  | UP       | NOCHANC  | NOCHANC  |
| NOCHANC  | DOWN     | DOWN     | NOCHANC  | DOWN     | NOCHANC  | DOWN     | NOCHANC  | DOWN     |
| NOCHANC  | DOWN     | DOWN     | DOWN     | DOWN     | NOCHANC  | DOWN     | NOCHANC  | DOWN     |
| NOCHANC  | DOWN     | DOWN     | NOCHANC  | DOWN     | DOWN     | NOCHANC  | UP       | DOWN     |
| NOCHANC  | DOWN     | NOCHANC  | NOCHANC  | DOWN     | NOCHANC  | NOCHANC  | DOWN     | DOWN     |
| UP       | UP       | UP       | UP       | UP       | UP       | UP       | UP       | UP       |
| NOCHANC  | NOCHANC  | DOWN     | NOCHANC  | NOCHANC  | DOWN     | NOCHANC  | NOCHANC  | NOCHANC  |
| DOWN     | NOCHANC  | NOCHANC  | NOCHANC  | NOCHANC  | DOWN     | NOCHANC  | NOCHANC  | NOCHANC  |
| NOCHANC  | DOWN     | NOCHANC  | NOCHANC  | NOCHANC  | NOCHANC  | NOCHANC  | NOCHANC  | NOCHANC  |
| DOWN     | DOWN     | DOWN     | NOCHANC  | NOCHANC  | DOWN     | DOWN     | NOCHANC  | NOCHANC  |
| NOCHANC  | NOCHANC  | NOCHANC  | NOCHANC  | NOCHANC  | DOWN     | NOCHANC  | UP       | NOCHANC  |
| NOCHANC  | NOCHANC  | NOCHANC  | UP       | NOCHANC  | UP       | NOCHANC  | UP       | NOCHANC  |
| NOCHANC  | UP       | NOCHANC  | NOCHANC  | NOCHANC  | NOCHANC  | NOCHANC  | NOCHANC  | NOCHANC  |
| NOCHANC  | NOCHANC  | NOCHANC  | NOCHANC  | NOCHANC  | UP       | NOCHANC  | DOWN     | NOCHANC  |
| NOCHANC  | NOCHANC  | DOWN     | NOCHANC  | NOCHANC  | DOWN     | NOCHANC  | NOCHANC  | NOCHANC  |
| NOCHANC  | UP       | UP       | NOCHANC  | NOCHANC  | NOCHANC  | UP       | NOCHANC  | NOCHANC  |
| NOCHANC  | NOCHANC  | NOCHANC  | NOCHANC  | NOCHANC  | UP       | NOCHANC  | NOCHANC  | NOCHANC  |
| NOCHANC  | NOCHANC  | NOCHANC  | NOCHANC  | NOCHANC  | UP       | DOWN     | DOWN     | UP       |
| DOWN     | DOWN     | NOCHANC  | NOCHANC  | NOCHANC  | NOCHANC  | NOCHANC  | NOCHANC  | DOWN     |
| DOWN     | DOWN     | DOWN     | DOWN     | DOWN     | DOWN     | DOWN     | NOCHANC  | DOWN     |
| UP       | UP       | UP       | UP       | NOCHANC  | UP       | NOCHANC  | NOCHANC  | NOCHANC  |
| NOCHANC  | NOCHANC  | NOCHANC  | NOCHANC  | UP       | NOCHANC  | UP       | UP       | NOCHANC  |
| NOCHANC  | NOCHANC  | NOCHANC  | UP       | NOCHANC  | NOCHANC  | NOCHANC  | UP       | UP       |

TCGA-BP- TCGA-B0- TCGA-CZ- TCGA-CZ- TCGA-CJ- TCGA-AK- TCGA-B0- TCGA-CJ- TCGA-B0-  
NOCHAN( DOWN NOCHAN( DOWN NOCHAN( NOCHAN( DOWN DOWN NOCHAN(  
NOCHAN( DOWN DOWN NOCHAN( DOWN NOCHAN( DOWN NOCHAN( NOCHAN(  
DOWN DOWN DOWN DOWN DOWN DOWN DOWN DOWN DOWN  
UP NOCHAN( NOCHAN( NOCHAN( NOCHAN( NOCHAN( NOCHAN( NOCHAN( NOCHAN( NOCHAN(  
UP DOWN NOCHAN( NOCHAN( NOCHAN( NOCHAN( NOCHAN( NOCHAN( NOCHAN( DOWN  
DOWN DOWN DOWN NOCHAN( DOWN DOWN DOWN NOCHAN( UP  
NOCHAN( DOWN DOWN DOWN DOWN DOWN DOWN DOWN NOCHAN( NOCHAN(  
NOCHAN( NOCHAN( NOCHAN( NOCHAN( NOCHAN( NOCHAN( NOCHAN( NOCHAN( NOCHAN(  
UP UP NOCHAN( NOCHAN( UP UP UP NOCHAN( NOCHAN(  
DOWN DOWN NOCHAN( DOWN NOCHAN( DOWN DOWN NOCHAN( DOWN  
NOCHAN( NOCHAN( NOCHAN( NOCHAN( NOCHAN( NOCHAN( NOCHAN( NOCHAN( NOCHAN(  
NOCHAN( NOCHAN( NOCHAN( NOCHAN( NOCHAN( NOCHAN( NOCHAN( DOWN NOCHAN( UP  
NOCHAN( DOWN NOCHAN( NOCHAN( NOCHAN( NOCHAN( NOCHAN( NOCHAN( NOCHAN( DOWN  
NOCHAN( UP NOCHAN( NOCHAN( NOCHAN( NOCHAN( NOCHAN( NOCHAN( NOCHAN( NOCHAN(  
NOCHAN( DOWN NOCHAN( NOCHAN( NOCHAN( NOCHAN( DOWN DOWN NOCHAN( NOCHAN(  
NOCHAN( UP DOWN NOCHAN( NOCHAN( NOCHAN( UP UP NOCHAN( UP  
UP DOWN NOCHAN( DOWN NOCHAN( NOCHAN( NOCHAN( NOCHAN( NOCHAN( NOCHAN(  
UP NOCHAN( NOCHAN( NOCHAN( NOCHAN( NOCHAN( NOCHAN( NOCHAN( UP NOCHAN(  
DOWN DOWN NOCHAN( NOCHAN( DOWN NOCHAN( DOWN NOCHAN( UP  
NOCHAN( DOWN DOWN NOCHAN( DOWN NOCHAN( DOWN NOCHAN( NOCHAN(  
DOWN DOWN DOWN NOCHAN( DOWN DOWN DOWN NOCHAN( NOCHAN(  
NOCHAN( NOCHAN( NOCHAN( NOCHAN( NOCHAN( NOCHAN( NOCHAN( NOCHAN( DOWN  
UP UP UP UP UP UP UP UP NOCHAN(  
NOCHAN( DOWN NOCHAN( DOWN NOCHAN( DOWN NOCHAN( NOCHAN( NOCHAN( UP  
NOCHAN( DOWN NOCHAN( NOCHAN( DOWN NOCHAN( NOCHAN( NOCHAN( NOCHAN( NOCHAN(  
NOCHAN( DOWN NOCHAN( NOCHAN( NOCHAN( DOWN DOWN NOCHAN( NOCHAN(  
NOCHAN( DOWN DOWN DOWN DOWN DOWN DOWN DOWN DOWN DOWN  
NOCHAN( DOWN NOCHAN( NOCHAN( NOCHAN( NOCHAN( NOCHAN( DOWN NOCHAN( UP  
NOCHAN( NOCHAN( NOCHAN( UP NOCHAN( NOCHAN( NOCHAN( NOCHAN( NOCHAN( UP  
DOWN NOCHAN( NOCHAN( NOCHAN( NOCHAN( NOCHAN( NOCHAN( DOWN NOCHAN( NOCHAN(  
NOCHAN( UP NOCHAN( UP UP UP UP NOCHAN( NOCHAN(  
NOCHAN( DOWN NOCHAN( NOCHAN( DOWN NOCHAN( DOWN NOCHAN( DOWN  
NOCHAN( NOCHAN( UP NOCHAN( NOCHAN( NOCHAN( NOCHAN( NOCHAN( UP DOWN  
NOCHAN( UP NOCHAN( NOCHAN( NOCHAN( NOCHAN( NOCHAN( NOCHAN( NOCHAN( NOCHAN(  
NOCHAN( UP DOWN UP NOCHAN( UP UP UP DOWN  
NOCHAN( NOCHAN( NOCHAN( DOWN NOCHAN( NOCHAN( DOWN NOCHAN( NOCHAN(  
DOWN DOWN DOWN DOWN NOCHAN( NOCHAN( DOWN DOWN DOWN  
UP NOCHAN( UP UP UP UP NOCHAN( UP NOCHAN(  
NOCHAN( NOCHAN( UP NOCHAN( NOCHAN( NOCHAN( DOWN UP UP  
UP NOCHAN( NOCHAN( DOWN NOCHAN( DOWN NOCHAN( NOCHAN( NOCHAN(

| TCGA-B0- | TCGA-BP- | TCGA-CW | TCGA-BP- | TCGA-B0- | TCGA-CJ- | TCGA-B0- | TCGA-B0- | TCGA-B0- |
|----------|----------|---------|----------|----------|----------|----------|----------|----------|
| NOCHAN(  | NOCHAN(  | DOWN    | DOWN     | DOWN     | DOWN     | DOWN     | DOWN     | DOWN     |
| DOWN     | DOWN     | DOWN    | DOWN     | DOWN     | NOCHAN(  | DOWN     | NOCHAN(  | DOWN     |
| DOWN     | DOWN     | DOWN    | DOWN     | DOWN     | DOWN     | DOWN     | DOWN     | DOWN     |
| UP       | NOCHAN(  | NOCHAN( | NOCHAN(  | UP       | NOCHAN(  | NOCHAN(  | NOCHAN(  | UP       |
| DOWN     | NOCHAN(  | NOCHAN( | NOCHAN(  | NOCHAN(  | DOWN     | NOCHAN(  | NOCHAN(  | UP       |
| NOCHAN(  | NOCHAN(  | DOWN    | DOWN     | DOWN     | DOWN     | DOWN     | DOWN     | DOWN     |
| UP       | NOCHAN(  | NOCHAN( | DOWN     | NOCHAN(  | DOWN     | NOCHAN(  | DOWN     | NOCHAN(  |
| NOCHAN(  | NOCHAN(  | NOCHAN( | NOCHAN(  | NOCHAN(  | NOCHAN(  | DOWN     | NOCHAN(  | NOCHAN(  |
| NOCHAN(  | NOCHAN(  | UP      | UP       | NOCHAN(  | NOCHAN(  | NOCHAN(  | NOCHAN(  | UP       |
| DOWN     | NOCHAN(  | NOCHAN( | DOWN     | DOWN     | DOWN     | NOCHAN(  | DOWN     | DOWN     |
| NOCHAN(  | UP       | NOCHAN( | NOCHAN(  | NOCHAN(  | NOCHAN(  | UP       | UP       | NOCHAN(  |
| NOCHAN(  | NOCHAN(  | NOCHAN( | NOCHAN(  | DOWN     | NOCHAN(  | NOCHAN(  | NOCHAN(  | NOCHAN(  |
| DOWN     | NOCHAN(  | NOCHAN( | NOCHAN(  | NOCHAN(  | NOCHAN(  | NOCHAN(  | NOCHAN(  | DOWN     |
| NOCHAN(  | NOCHAN(  | NOCHAN( | NOCHAN(  | NOCHAN(  | NOCHAN(  | NOCHAN(  | NOCHAN(  | NOCHAN(  |
| NOCHAN(  | NOCHAN(  | UP      | DOWN     | NOCHAN(  | NOCHAN(  | NOCHAN(  | NOCHAN(  | NOCHAN(  |
| NOCHAN(  | NOCHAN(  | NOCHAN( | NOCHAN(  | NOCHAN(  | NOCHAN(  | NOCHAN(  | NOCHAN(  | UP       |
| NOCHAN(  | UP       | NOCHAN( | NOCHAN(  | UP       | DOWN     | NOCHAN(  | NOCHAN(  | UP       |
| DOWN     | UP       | UP      | NOCHAN(  | UP       | NOCHAN(  | NOCHAN(  | UP       | NOCHAN(  |
| NOCHAN(  | NOCHAN(  | DOWN    | DOWN     | DOWN     | DOWN     | DOWN     | DOWN     | DOWN     |
| DOWN     | NOCHAN(  | NOCHAN( | DOWN     | NOCHAN(  | DOWN     | NOCHAN(  | DOWN     | DOWN     |
| NOCHAN(  | NOCHAN(  | DOWN    | DOWN     | DOWN     | DOWN     | NOCHAN(  | DOWN     | DOWN     |
| DOWN     | NOCHAN(  | NOCHAN( | NOCHAN(  | NOCHAN(  | NOCHAN(  | NOCHAN(  | NOCHAN(  | NOCHAN(  |
| DOWN     | UP       | UP      | UP       | UP       | UP       | UP       | UP       | UP       |
| NOCHAN(  | NOCHAN(  | NOCHAN( | DOWN     | NOCHAN(  | DOWN     | NOCHAN(  | NOCHAN(  | DOWN     |
| NOCHAN(  | NOCHAN(  | NOCHAN( | DOWN     | NOCHAN(  | NOCHAN(  | NOCHAN(  | NOCHAN(  | NOCHAN(  |
| UP       | NOCHAN(  | NOCHAN( | DOWN     | NOCHAN(  | DOWN     | NOCHAN(  | NOCHAN(  | NOCHAN(  |
| DOWN     | DOWN     | DOWN    | DOWN     | DOWN     | DOWN     | DOWN     | NOCHAN(  | NOCHAN(  |
| UP       | NOCHAN(  | NOCHAN( | DOWN     | NOCHAN(  | DOWN     | NOCHAN(  | DOWN     | DOWN     |
| UP       | NOCHAN(  | NOCHAN( | NOCHAN(  | NOCHAN(  | NOCHAN(  | NOCHAN(  | NOCHAN(  | NOCHAN(  |
| NOCHAN(  | NOCHAN(  | NOCHAN( | NOCHAN(  | NOCHAN(  | NOCHAN(  | UP       | NOCHAN(  | NOCHAN(  |
| DOWN     | NOCHAN(  | NOCHAN( | UP       | NOCHAN(  | NOCHAN(  | NOCHAN(  | NOCHAN(  | UP       |
| DOWN     | NOCHAN(  | NOCHAN( | DOWN     | NOCHAN(  | DOWN     | NOCHAN(  | NOCHAN(  | DOWN     |
| DOWN     | UP       | UP      | NOCHAN(  | UP       | NOCHAN(  | UP       | NOCHAN(  | UP       |
| NOCHAN(  | NOCHAN(  | NOCHAN( | NOCHAN(  | NOCHAN(  | NOCHAN(  | NOCHAN(  | NOCHAN(  | NOCHAN(  |
| DOWN     | NOCHAN(  | NOCHAN( | NOCHAN(  | NOCHAN(  | NOCHAN(  | NOCHAN(  | UP       | NOCHAN(  |
| NOCHAN(  | NOCHAN(  | NOCHAN( | DOWN     | DOWN     | NOCHAN(  | NOCHAN(  | DOWN     | DOWN     |
| NOCHAN(  | DOWN     | DOWN    | DOWN     | DOWN     | DOWN     | DOWN     | DOWN     | DOWN     |
| DOWN     | UP       | UP      | NOCHAN(  | NOCHAN(  | UP       | UP       | NOCHAN(  | NOCHAN(  |
| DOWN     | UP       | UP      | DOWN     | NOCHAN(  | NOCHAN(  | UP       | NOCHAN(  | DOWN     |
| NOCHAN(  | NOCHAN(  | NOCHAN( | NOCHAN(  | UP       | NOCHAN(  | NOCHAN(  | UP       | UP       |

| TCGA-CZ- | TCGA-BP- | TCGA-CZ- | TCGA-A3- | TCGA-B0- | TCGA-BP- | TCGA-CW | TCGA-AK- | TCGA-AK- |
|----------|----------|----------|----------|----------|----------|---------|----------|----------|
| NOCHAN(  | DOWN     | DOWN     | DOWN     | NOCHAN(  | DOWN     | NOCHAN( | NOCHAN(  | DOWN     |
| NOCHAN(  | NOCHAN(  | NOCHAN(  | NOCHAN(  | NOCHAN(  | NOCHAN(  | NOCHAN( | DOWN     | DOWN     |
| DOWN     | DOWN     | UP       |          | NOCHAN(  | DOWN     | DOWN    | DOWN     | DOWN     |
| NOCHAN(  | NOCHAN(  | DOWN     |          | NOCHAN(  | NOCHAN(  | NOCHAN( | NOCHAN(  | NOCHAN(  |
| DOWN     | NOCHAN(  | DOWN     |          | NOCHAN(  | NOCHAN(  | NOCHAN( | DOWN     | NOCHAN(  |
| NOCHAN(  | NOCHAN(  | UP       |          | NOCHAN(  | DOWN     | DOWN    | DOWN     | UP       |
| DOWN     | NOCHAN(  | NOCHAN(  | NOCHAN(  | DOWN     | DOWN     | DOWN    | UP       | DOWN     |
| NOCHAN(  | NOCHAN(  | DOWN     |          | NOCHAN(  | UP       |         | NOCHAN(  | NOCHAN(  |
| UP       | NOCHAN(  | DOWN     | UP       | UP       |          | NOCHAN( | NOCHAN(  | NOCHAN(  |
| NOCHAN(  | NOCHAN(  | UP       |          | DOWN     |          | NOCHAN( | NOCHAN(  | DOWN     |
| NOCHAN(  | NOCHAN(  | UP       | UP       |          | NOCHAN(  | NOCHAN( | NOCHAN(  | NOCHAN(  |
| NOCHAN(  | NOCHAN(  | DOWN     | DOWN     |          | NOCHAN(  | DOWN    | NOCHAN(  | UP       |
| NOCHAN(  | NOCHAN(  | UP       |          | NOCHAN(  | NOCHAN(  | DOWN    | NOCHAN(  | NOCHAN(  |
| UP       | NOCHAN(  | DOWN     |          | NOCHAN(  | NOCHAN(  | NOCHAN( | UP       | UP       |
| NOCHAN(  | NOCHAN(  | DOWN     |          | NOCHAN(  | NOCHAN(  | NOCHAN( | DOWN     | NOCHAN(  |
| NOCHAN(  | NOCHAN(  | DOWN     | DOWN     |          | NOCHAN(  | NOCHAN( | NOCHAN(  | UP       |
| NOCHAN(  | NOCHAN(  | NOCHAN(  | NOCHAN(  | NOCHAN(  | NOCHAN(  | NOCHAN( | DOWN     | DOWN     |
| NOCHAN(  | UP       |          | NOCHAN(  | UP       |          | NOCHAN( | UP       | DOWN     |
| NOCHAN(  | DOWN     | UP       | DOWN     | DOWN     |          | NOCHAN( | NOCHAN(  | UP       |
| DOWN     | DOWN     | DOWN     |          | NOCHAN(  | DOWN     | NOCHAN( | DOWN     | NOCHAN(  |
| NOCHAN(  | NOCHAN(  | UP       |          | DOWN     |          | NOCHAN( | DOWN     | DOWN     |
| NOCHAN(  | NOCHAN(  | NOCHAN(  | NOCHAN(  | DOWN     | DOWN     |         | NOCHAN(  | NOCHAN(  |
| UP       | UP       | DOWN     | UP       | UP       |          | NOCHAN( | UP       | UP       |
| NOCHAN(  | NOCHAN(  | UP       |          | NOCHAN(  | DOWN     |         | NOCHAN(  | NOCHAN(  |
| NOCHAN(  | NOCHAN(  | UP       |          | NOCHAN(  | DOWN     |         | NOCHAN(  | NOCHAN(  |
| NOCHAN(  | DOWN     | DOWN     |          | NOCHAN(  | NOCHAN(  | NOCHAN( | NOCHAN(  | DOWN     |
| DOWN     | DOWN     | DOWN     |          | DOWN     |          | NOCHAN( | DOWN     | DOWN     |
| NOCHAN(  | NOCHAN(  | DOWN     |          | NOCHAN(  | NOCHAN(  | NOCHAN( | NOCHAN(  | UP       |
| NOCHAN(  | NOCHAN(  | DOWN     |          | NOCHAN(  | UP       | UP      |          | NOCHAN(  |
| NOCHAN(  | DOWN     |          | NOCHAN(  | DOWN     |          | NOCHAN( | DOWN     | UP       |
| UP       | DOWN     | DOWN     |          | NOCHAN(  | NOCHAN(  | NOCHAN( | NOCHAN(  | NOCHAN(  |
| NOCHAN(  | NOCHAN(  | UP       |          | NOCHAN(  | DOWN     |         | NOCHAN(  | NOCHAN(  |
| NOCHAN(  | NOCHAN(  | UP       | UP       |          | NOCHAN(  | UP      |          | NOCHAN(  |
| NOCHAN(  | NOCHAN(  | DOWN     |          | NOCHAN(  | NOCHAN(  | NOCHAN( | NOCHAN(  | UP       |
| UP       | NOCHAN(  | DOWN     |          | NOCHAN(  | UP       |         | NOCHAN(  | NOCHAN(  |
| NOCHAN(  | NOCHAN(  | NOCHAN(  | DOWN     |          | NOCHAN(  | DOWN    |          | NOCHAN(  |
| DOWN     | DOWN     | NOCHAN(  | DOWN     |          | DOWN     | NOCHAN( | DOWN     | NOCHAN(  |
| UP       | UP       | UP       | UP       |          | NOCHAN(  | NOCHAN( | NOCHAN(  | NOCHAN(  |
| UP       | UP       |          | NOCHAN(  | UP       |          | NOCHAN( | UP       | NOCHAN(  |
| UP       | NOCHAN(  | DOWN     | UP       |          | NOCHAN(  | UP      |          | DOWN     |



|          |          |          |          |          |          |          |          |          |
|----------|----------|----------|----------|----------|----------|----------|----------|----------|
| TCGA-BP- | TCGA-BP- | TCGA-BP- | TCGA-B0- | TCGA-CJ- | TCGA-BP- | TCGA-B0- | TCGA-A3- | TCGA-B0- |
| DOWN     | DOWN     | DOWN     | NOCHAN(  | DOWN     | DOWN     | DOWN     | NOCHAN(  | DOWN     |
| NOCHAN(  | DOWN     | DOWN     | NOCHAN(  | NOCHAN(  | NOCHAN(  | DOWN     | NOCHAN(  | DOWN     |
| NOCHAN(  | DOWN     | DOWN     | DOWN     | DOWN     | DOWN     | DOWN     | DOWN     | DOWN     |
| DOWN     | NOCHAN(  | NOCHAN(  | NOCHAN(  | NOCHAN(  | NOCHAN(  | UP       | NOCHAN(  | NOCHAN(  |
| NOCHAN(  | NOCHAN(  | NOCHAN(  | NOCHAN(  | NOCHAN(  | DOWN     | NOCHAN(  | NOCHAN(  | NOCHAN(  |
| NOCHAN(  | DOWN     | NOCHAN(  | NOCHAN(  | DOWN     | DOWN     | DOWN     | NOCHAN(  | DOWN     |
| NOCHAN(  | DOWN     | DOWN     | NOCHAN(  | NOCHAN(  | NOCHAN(  | NOCHAN(  | NOCHAN(  | NOCHAN(  |
| NOCHAN(  | NOCHAN(  | NOCHAN(  | NOCHAN(  | UP       | NOCHAN(  | NOCHAN(  | NOCHAN(  | NOCHAN(  |
| NOCHAN(  | UP       | NOCHAN(  | UP       | UP       | NOCHAN(  | UP       | NOCHAN(  | UP       |
| NOCHAN(  | DOWN     | NOCHAN(  | NOCHAN(  | DOWN     | DOWN     | DOWN     | DOWN     | DOWN     |
| NOCHAN(  | NOCHAN(  | UP       | NOCHAN(  | NOCHAN(  | NOCHAN(  | UP       | NOCHAN(  | UP       |
| DOWN     | NOCHAN(  | DOWN     | NOCHAN(  | NOCHAN(  | NOCHAN(  | NOCHAN(  | NOCHAN(  | NOCHAN(  |
| NOCHAN(  | NOCHAN(  | NOCHAN(  | NOCHAN(  | NOCHAN(  | NOCHAN(  | NOCHAN(  | NOCHAN(  | NOCHAN(  |
| NOCHAN(  | NOCHAN(  | NOCHAN(  | NOCHAN(  | NOCHAN(  | NOCHAN(  | NOCHAN(  | NOCHAN(  | UP       |
| DOWN     | DOWN     | NOCHAN(  | NOCHAN(  | NOCHAN(  | NOCHAN(  | DOWN     | DOWN     | DOWN     |
| NOCHAN(  | UP       | NOCHAN(  | NOCHAN(  | NOCHAN(  | NOCHAN(  | NOCHAN(  | UP       | NOCHAN(  |
| DOWN     | NOCHAN(  | NOCHAN(  | NOCHAN(  | NOCHAN(  | DOWN     | UP       | NOCHAN(  | DOWN     |
| NOCHAN(  | NOCHAN(  | NOCHAN(  | UP       | NOCHAN(  | NOCHAN(  | NOCHAN(  | UP       | NOCHAN(  |
| NOCHAN(  | DOWN     | DOWN     | DOWN     | DOWN     | DOWN     | DOWN     | NOCHAN(  | DOWN     |
| DOWN     | DOWN     | DOWN     | DOWN     | DOWN     | DOWN     | DOWN     | DOWN     | DOWN     |
| DOWN     | DOWN     | NOCHAN(  | NOCHAN(  | DOWN     | DOWN     | DOWN     | DOWN     | DOWN     |
| NOCHAN(  | NOCHAN(  | NOCHAN(  | NOCHAN(  | NOCHAN(  | NOCHAN(  | NOCHAN(  | DOWN     | NOCHAN(  |
| UP       | UP       | UP       | UP       | UP       | UP       | UP       | UP       | UP       |
| NOCHAN(  | DOWN     | NOCHAN(  | NOCHAN(  | DOWN     | DOWN     | DOWN     | NOCHAN(  | DOWN     |
| NOCHAN(  | DOWN     | NOCHAN(  | DOWN     | NOCHAN(  | NOCHAN(  | NOCHAN(  | NOCHAN(  | DOWN     |
| DOWN     | NOCHAN(  | NOCHAN(  | NOCHAN(  | NOCHAN(  | DOWN     | NOCHAN(  | NOCHAN(  | NOCHAN(  |
| DOWN     | DOWN     | DOWN     | DOWN     | DOWN     | DOWN     | DOWN     | DOWN     | DOWN     |
| NOCHAN(  | DOWN     | NOCHAN(  | NOCHAN(  | NOCHAN(  | NOCHAN(  | DOWN     | NOCHAN(  | NOCHAN(  |
| NOCHAN(  | NOCHAN(  | UP       | NOCHAN(  | NOCHAN(  | NOCHAN(  | NOCHAN(  | NOCHAN(  | DOWN     |
| NOCHAN(  | NOCHAN(  | NOCHAN(  | NOCHAN(  | DOWN     | NOCHAN(  | DOWN     | DOWN     | UP       |
| NOCHAN(  | UP       | DOWN     | NOCHAN(  | NOCHAN(  | NOCHAN(  | UP       | DOWN     | UP       |
| UP       | DOWN     | NOCHAN(  | NOCHAN(  | NOCHAN(  | NOCHAN(  | DOWN     | NOCHAN(  | DOWN     |
| UP       | NOCHAN(  | UP       | NOCHAN(  | NOCHAN(  | NOCHAN(  | NOCHAN(  | NOCHAN(  | NOCHAN(  |
| NOCHAN(  | UP       | NOCHAN(  | NOCHAN(  | NOCHAN(  | NOCHAN(  | NOCHAN(  | NOCHAN(  | UP       |
| NOCHAN(  | NOCHAN(  | NOCHAN(  | UP       | UP       | UP       | DOWN     | UP       | NOCHAN(  |
| NOCHAN(  | NOCHAN(  | NOCHAN(  | NOCHAN(  | NOCHAN(  | DOWN     | NOCHAN(  | NOCHAN(  | DOWN     |
| NOCHAN(  | DOWN     | DOWN     | DOWN     | DOWN     | DOWN     | DOWN     | DOWN     | DOWN     |
| UP       | NOCHAN(  | NOCHAN(  | NOCHAN(  | UP       | NOCHAN(  | DOWN     | UP       | NOCHAN(  |
| UP       | NOCHAN(  | UP       | UP       | UP       | UP       | DOWN     | UP       | NOCHAN(  |
| DOWN     | NOCHAN(  | NOCHAN(  | NOCHAN(  | NOCHAN(  | DOWN     | UP       | UP       | NOCHAN(  |

TCGA-B0- TCGA-A3- TCGA-CJ- TCGA-CJ- TCGA-A3- TCGA-B8- TCGA-BP- TCGA-B0- TCGA-CW  
NOCHAN( DOWN NOCHAN( DOWN NOCHAN( NOCHAN( NOCHAN( NOCHAN( DOWN  
DOWN NOCHAN( NOCHAN( DOWN DOWN DOWN DOWN NOCHAN( NOCHAN(  
DOWN DOWN DOWN DOWN DOWN DOWN DOWN DOWN NOCHAN(  
NOCHAN( NOCHAN( NOCHAN( NOCHAN( NOCHAN( UP UP NOCHAN( NOCHAN(  
NOCHAN( UP NOCHAN( NOCHAN( NOCHAN( NOCHAN( UP DOWN NOCHAN(  
DOWN NOCHAN( DOWN DOWN DOWN DOWN DOWN DOWN NOCHAN( NOCHAN(  
DOWN NOCHAN( DOWN NOCHAN( DOWN DOWN DOWN NOCHAN( NOCHAN(  
NOCHAN( NOCHAN( NOCHAN( NOCHAN( NOCHAN( NOCHAN( UP NOCHAN( NOCHAN(  
UP NOCHAN( UP UP NOCHAN( NOCHAN( UP UP UP  
NOCHAN( NOCHAN( DOWN DOWN NOCHAN( DOWN DOWN NOCHAN( NOCHAN(  
NOCHAN( UP NOCHAN( NOCHAN( UP NOCHAN( UP NOCHAN( UP  
NOCHAN( NOCHAN( NOCHAN( NOCHAN( NOCHAN( DOWN DOWN NOCHAN( NOCHAN(  
NOCHAN( NOCHAN( NOCHAN( NOCHAN( NOCHAN( DOWN NOCHAN( NOCHAN( NOCHAN(  
NOCHAN( NOCHAN( UP NOCHAN( NOCHAN( NOCHAN( NOCHAN( NOCHAN( NOCHAN(  
NOCHAN( NOCHAN( NOCHAN( NOCHAN( NOCHAN( NOCHAN( DOWN NOCHAN( NOCHAN(  
UP DOWN NOCHAN( NOCHAN( UP NOCHAN( NOCHAN( NOCHAN( NOCHAN(  
NOCHAN( NOCHAN( NOCHAN( DOWN UP UP NOCHAN( DOWN DOWN NOCHAN(  
NOCHAN( NOCHAN( NOCHAN( NOCHAN( NOCHAN( NOCHAN( NOCHAN( NOCHAN( NOCHAN(  
DOWN NOCHAN( DOWN DOWN DOWN DOWN DOWN DOWN DOWN NOCHAN(  
NOCHAN( NOCHAN( NOCHAN( NOCHAN( NOCHAN( NOCHAN( DOWN NOCHAN( NOCHAN(  
NOCHAN( NOCHAN( NOCHAN( NOCHAN( NOCHAN( UP UP NOCHAN( NOCHAN(  
NOCHAN( NOCHAN( DOWN UP DOWN NOCHAN( DOWN DOWN DOWN  
NOCHAN( NOCHAN( UP UP NOCHAN( DOWN NOCHAN( DOWN NOCHAN( UP  
UP UP NOCHAN( DOWN UP UP DOWN UP UP  
NOCHAN( UP NOCHAN( NOCHAN( NOCHAN( UP UP NOCHAN( UP

| TCGA-BP- | TCGA-BP- | TCGA-CZ- | TCGA-B8- | TCGA-BP- | TCGA-BP- | TCGA-B8- | TCGA-B0- | TCGA-BP- |
|----------|----------|----------|----------|----------|----------|----------|----------|----------|
| DOWN     | DOWN     | UP       | NOCHAN(  | NOCHAN(  | NOCHAN(  | DOWN     | DOWN     | NOCHAN(  |
| DOWN     | DOWN     | NOCHAN(  | NOCHAN(  | NOCHAN(  | DOWN     | NOCHAN(  | DOWN     | NOCHAN(  |
| DOWN     | DOWN     | DOWN     | NOCHAN(  | NOCHAN(  | DOWN     | NOCHAN(  | DOWN     | DOWN     |
| NOCHAN(  | UP       | NOCHAN(  | NOCHAN(  | NOCHAN(  | NOCHAN(  | NOCHAN(  | UP       | UP       |
| NOCHAN(  | UP       | NOCHAN(  | NOCHAN(  | NOCHAN(  | NOCHAN(  | NOCHAN(  | NOCHAN(  | NOCHAN(  |
| DOWN     | DOWN     | DOWN     | DOWN     | NOCHAN(  | NOCHAN(  | NOCHAN(  | DOWN     | NOCHAN(  |
| DOWN     | NOCHAN(  | DOWN     | DOWN     | UP       | NOCHAN(  | DOWN     | DOWN     | NOCHAN(  |
| NOCHAN(  | NOCHAN(  | NOCHAN(  | UP       | NOCHAN(  | NOCHAN(  | NOCHAN(  | NOCHAN(  | NOCHAN(  |
| UP       | NOCHAN(  | NOCHAN(  | NOCHAN(  | NOCHAN(  | UP       | NOCHAN(  | UP       | UP       |
| DOWN     | DOWN     | NOCHAN(  | DOWN     | NOCHAN(  | DOWN     | DOWN     | DOWN     | DOWN     |
| UP       | NOCHAN(  | NOCHAN(  | NOCHAN(  | NOCHAN(  | NOCHAN(  | NOCHAN(  | UP       | NOCHAN(  |
| NOCHAN(  | DOWN     | NOCHAN(  | NOCHAN(  | NOCHAN(  | NOCHAN(  | NOCHAN(  | NOCHAN(  | DOWN     |
| NOCHAN(  | NOCHAN(  | NOCHAN(  | NOCHAN(  | NOCHAN(  | NOCHAN(  | NOCHAN(  | NOCHAN(  | DOWN     |
| NOCHAN(  | NOCHAN(  | NOCHAN(  | UP       | NOCHAN(  | NOCHAN(  | NOCHAN(  | NOCHAN(  | NOCHAN(  |
| DOWN     | NOCHAN(  | NOCHAN(  | NOCHAN(  | NOCHAN(  | NOCHAN(  | NOCHAN(  | DOWN     | NOCHAN(  |
| NOCHAN(  | NOCHAN(  | NOCHAN(  | DOWN     | NOCHAN(  | NOCHAN(  | UP       | NOCHAN(  | NOCHAN(  |
| NOCHAN(  | UP       | UP       | NOCHAN(  | NOCHAN(  | UP       | NOCHAN(  | UP       | NOCHAN(  |
| NOCHAN(  | NOCHAN(  | UP       | NOCHAN(  | NOCHAN(  | NOCHAN(  | NOCHAN(  | NOCHAN(  | UP       |
| DOWN     | DOWN     | NOCHAN(  | DOWN     | NOCHAN(  | NOCHAN(  | DOWN     | DOWN     | DOWN     |
| DOWN     | NOCHAN(  | NOCHAN(  | DOWN     | NOCHAN(  | NOCHAN(  | DOWN     | DOWN     | NOCHAN(  |
| DOWN     | DOWN     | DOWN     | NOCHAN(  | UP       | DOWN     | DOWN     | DOWN     | NOCHAN(  |
| NOCHAN(  | NOCHAN(  | NOCHAN(  | NOCHAN(  | NOCHAN(  | DOWN     | DOWN     | NOCHAN(  | DOWN     |
| UP       | UP       | UP       | UP       | UP       | UP       | UP       | UP       | UP       |
| DOWN     | NOCHAN(  | NOCHAN(  | DOWN     | NOCHAN(  | NOCHAN(  | NOCHAN(  | DOWN     | NOCHAN(  |
| NOCHAN(  | NOCHAN(  | NOCHAN(  | NOCHAN(  | NOCHAN(  | NOCHAN(  | NOCHAN(  | NOCHAN(  | NOCHAN(  |
| DOWN     | NOCHAN(  | NOCHAN(  | NOCHAN(  | NOCHAN(  | NOCHAN(  | DOWN     | NOCHAN(  | NOCHAN(  |
| DOWN     | DOWN     | NOCHAN(  | NOCHAN(  | NOCHAN(  | DOWN     | DOWN     | DOWN     | DOWN     |
| DOWN     | NOCHAN(  | UP       | NOCHAN(  | NOCHAN(  | NOCHAN(  | NOCHAN(  | DOWN     | NOCHAN(  |
| NOCHAN(  | NOCHAN(  | NOCHAN(  | NOCHAN(  | UP       | NOCHAN(  | NOCHAN(  | NOCHAN(  | UP       |
| DOWN     | NOCHAN(  | NOCHAN(  | NOCHAN(  | NOCHAN(  | NOCHAN(  | NOCHAN(  | DOWN     | NOCHAN(  |
| UP       | NOCHAN(  | NOCHAN(  | NOCHAN(  | DOWN     | NOCHAN(  | NOCHAN(  | UP       | NOCHAN(  |
| DOWN     | NOCHAN(  | NOCHAN(  | DOWN     | NOCHAN(  | NOCHAN(  | DOWN     | DOWN     | NOCHAN(  |
| NOCHAN(  | UP       | UP       | NOCHAN(  | NOCHAN(  | NOCHAN(  | NOCHAN(  | NOCHAN(  | UP       |
| NOCHAN(  | NOCHAN(  | NOCHAN(  | NOCHAN(  | NOCHAN(  | DOWN     | NOCHAN(  | UP       | NOCHAN(  |
| NOCHAN(  | NOCHAN(  | UP       | NOCHAN(  | DOWN     | UP       | NOCHAN(  | DOWN     | NOCHAN(  |
| NOCHAN(  | DOWN     | NOCHAN(  | NOCHAN(  | NOCHAN(  | NOCHAN(  | NOCHAN(  | DOWN     | NOCHAN(  |
| DOWN     | NOCHAN(  | NOCHAN(  | DOWN     | NOCHAN(  | DOWN     | DOWN     | DOWN     | NOCHAN(  |
| NOCHAN(  | NOCHAN(  | UP       | UP       | NOCHAN(  | NOCHAN(  | NOCHAN(  | NOCHAN(  | NOCHAN(  |
| NOCHAN(  | NOCHAN(  | NOCHAN(  | NOCHAN(  | UP       | UP       | UP       | DOWN     | NOCHAN(  |
| NOCHAN(  | UP       | NOCHAN(  | NOCHAN(  | UP       | NOCHAN(  | NOCHAN(  | NOCHAN(  | UP       |

| TCGA-CZ- | TCGA-CJ- | TCGA-AK- | TCGA-BP- | TCGA-CW | TCGA-B2- | TCGA-CJ- | TCGA-B0- | TCGA-CJ- |
|----------|----------|----------|----------|---------|----------|----------|----------|----------|
| DOWN     | DOWN     | DOWN     | DOWN     | NOCHAN( | NOCHAN(  | DOWN     | DOWN     | NOCHAN(  |
| NOCHAN(  | NOCHAN(  | DOWN     | DOWN     | DOWN    | NOCHAN(  | NOCHAN(  | DOWN     | DOWN     |
| NOCHAN(  | DOWN     | DOWN     | DOWN     | DOWN    | DOWN     | DOWN     | DOWN     | DOWN     |
| NOCHAN(  | NOCHAN(  | UP       | NOCHAN(  | NOCHAN( | NOCHAN(  | NOCHAN(  | UP       | NOCHAN(  |
| NOCHAN(  | DOWN     | NOCHAN(  | NOCHAN(  | NOCHAN( | NOCHAN(  | DOWN     | DOWN     | NOCHAN(  |
| NOCHAN(  | DOWN     | DOWN     | DOWN     | DOWN    | DOWN     | DOWN     | DOWN     | DOWN     |
| NOCHAN(  | DOWN     | NOCHAN(  | DOWN     | NOCHAN( | DOWN     | DOWN     | DOWN     | DOWN     |
| NOCHAN(  | NOCHAN(  | UP       | NOCHAN(  | UP      | NOCHAN(  | DOWN     | DOWN     | NOCHAN(  |
| NOCHAN(  | UP       | UP       | NOCHAN(  | UP      | NOCHAN(  | UP       | UP       | UP       |
| NOCHAN(  | DOWN     | DOWN     | NOCHAN(  | NOCHAN( | DOWN     | DOWN     | DOWN     | DOWN     |
| NOCHAN(  | NOCHAN(  | UP       | UP       | NOCHAN( | UP       | NOCHAN(  | NOCHAN(  | UP       |
| DOWN     | NOCHAN(  | DOWN     | NOCHAN(  | NOCHAN( | NOCHAN(  | UP       | UP       | NOCHAN(  |
| NOCHAN(  | NOCHAN(  | DOWN     | NOCHAN(  | NOCHAN( | NOCHAN(  | NOCHAN(  | DOWN     | NOCHAN(  |
| NOCHAN(  | NOCHAN(  | NOCHAN(  | NOCHAN(  | NOCHAN( | NOCHAN(  | NOCHAN(  | UP       | UP       |
| UP       | NOCHAN(  | DOWN     | NOCHAN(  | NOCHAN( | NOCHAN(  | NOCHAN(  | DOWN     | DOWN     |
| NOCHAN(  | UP       | NOCHAN(  | UP       | NOCHAN( | NOCHAN(  | UP       | UP       | NOCHAN(  |
| NOCHAN(  | NOCHAN(  | NOCHAN(  | NOCHAN(  | NOCHAN( | NOCHAN(  | NOCHAN(  | DOWN     | NOCHAN(  |
| UP       | NOCHAN(  | NOCHAN(  | NOCHAN(  | UP      | UP       | NOCHAN(  | DOWN     | NOCHAN(  |
| NOCHAN(  | DOWN     | DOWN     | DOWN     | NOCHAN( | DOWN     | NOCHAN(  | DOWN     | DOWN     |
| DOWN     | DOWN     | DOWN     | DOWN     | DOWN    | NOCHAN(  | DOWN     | DOWN     | DOWN     |
| NOCHAN(  | DOWN     | DOWN     | NOCHAN(  | NOCHAN( | NOCHAN(  | DOWN     | DOWN     | DOWN     |
| NOCHAN(  | NOCHAN(  | DOWN     | NOCHAN(  | NOCHAN( | DOWN     | NOCHAN(  | NOCHAN(  | NOCHAN(  |
| UP       | UP       | UP       | UP       | UP      | UP       | UP       | UP       | UP       |
| NOCHAN(  | NOCHAN(  | DOWN     | NOCHAN(  | NOCHAN( | NOCHAN(  | DOWN     | DOWN     | DOWN     |
| NOCHAN(  | DOWN     | NOCHAN(  | DOWN     | NOCHAN( | NOCHAN(  | DOWN     | DOWN     | DOWN     |
| NOCHAN(  | NOCHAN(  | NOCHAN(  | NOCHAN(  | NOCHAN( | NOCHAN(  | DOWN     | DOWN     | NOCHAN(  |
| NOCHAN(  | DOWN     | DOWN     | DOWN     | DOWN    | DOWN     | DOWN     | DOWN     | DOWN     |
| NOCHAN(  | NOCHAN(  | DOWN     | NOCHAN(  | NOCHAN( | NOCHAN(  | NOCHAN(  | DOWN     | NOCHAN(  |
| NOCHAN(  | NOCHAN(  | NOCHAN(  | NOCHAN(  | NOCHAN( | DOWN     | DOWN     | DOWN     | DOWN     |
| NOCHAN(  | NOCHAN(  | NOCHAN(  | DOWN     | DOWN    | NOCHAN(  | NOCHAN(  | DOWN     | NOCHAN(  |
| NOCHAN(  | NOCHAN(  | UP       | NOCHAN(  | NOCHAN( | NOCHAN(  | UP       | UP       | UP       |
| NOCHAN(  | DOWN     | DOWN     | NOCHAN(  | NOCHAN( | DOWN     | DOWN     | DOWN     | DOWN     |
| UP       | NOCHAN(  | NOCHAN(  | NOCHAN(  | NOCHAN( | NOCHAN(  | NOCHAN(  | DOWN     | NOCHAN(  |
| NOCHAN(  | NOCHAN(  | NOCHAN(  | NOCHAN(  | NOCHAN( | NOCHAN(  | UP       | UP       | NOCHAN(  |
| UP       | UP       | NOCHAN(  | NOCHAN(  | UP      | DOWN     | UP       | DOWN     | DOWN     |
| NOCHAN(  | NOCHAN(  | DOWN     | NOCHAN(  | NOCHAN( | NOCHAN(  | NOCHAN(  | DOWN     | NOCHAN(  |
| DOWN     | DOWN     | DOWN     | DOWN     | NOCHAN( | DOWN     | DOWN     | DOWN     | DOWN     |
| UP       | UP       | DOWN     | NOCHAN(  | NOCHAN( | NOCHAN(  | UP       | NOCHAN(  | NOCHAN(  |
| NOCHAN(  | UP       | DOWN     | UP       | UP      | NOCHAN(  | UP       | DOWN     | DOWN     |
| NOCHAN(  | NOCHAN(  | UP       | NOCHAN(  | UP      | UP       | DOWN     | UP       | UP       |

| TCGA-DV | TCGA-BP | TCGA-A3 | TCGA-B8 | TCGA-A3 | TCGA-B8 | TCGA-A3 | TCGA-B0 | TCGA-B2 |
|---------|---------|---------|---------|---------|---------|---------|---------|---------|
| NOCHAN( | DOWN    | NOCHAN( | NOCHAN( | DOWN    | NOCHAN( | NOCHAN( | NOCHAN( | NOCHAN( |
| NOCHAN( | NOCHAN( | DOWN    | DOWN    | DOWN    | NOCHAN( | DOWN    | DOWN    | NOCHAN( |
| NOCHAN( | DOWN    | DOWN    | DOWN    | DOWN    | DOWN    | DOWN    | DOWN    | DOWN    |
| NOCHAN( | NOCHAN( | UP      | UP      | NOCHAN( | UP      | UP      | UP      | NOCHAN( |
| NOCHAN( | NOCHAN( | UP      | UP      | NOCHAN( | NOCHAN( | NOCHAN( | NOCHAN( | NOCHAN( |
| NOCHAN( | DOWN    | DOWN    | DOWN    | DOWN    | DOWN    | DOWN    | NOCHAN( | DOWN    |
| DOWN    | DOWN    | NOCHAN( | NOCHAN( | NOCHAN( | DOWN    | NOCHAN( | DOWN    | NOCHAN( |
| NOCHAN( | NOCHAN( | NOCHAN( | NOCHAN( | NOCHAN( | NOCHAN( | NOCHAN( | NOCHAN( | NOCHAN( |
| NOCHAN( | UP      | UP      | NOCHAN( | NOCHAN( | UP      | UP      | UP      | NOCHAN( |
| DOWN    | DOWN    | NOCHAN( | DOWN    | NOCHAN( | DOWN    | DOWN    | NOCHAN( | DOWN    |
| UP      | NOCHAN( | NOCHAN( | NOCHAN( | UP      | NOCHAN( | NOCHAN( | UP      | NOCHAN( |
| NOCHAN( | NOCHAN( | DOWN    | NOCHAN( | DOWN    | NOCHAN( | NOCHAN( | NOCHAN( | NOCHAN( |
| NOCHAN( | NOCHAN( | NOCHAN( | NOCHAN( | NOCHAN( | NOCHAN( | NOCHAN( | NOCHAN( | NOCHAN( |
| NOCHAN( | UP      | NOCHAN( | NOCHAN( | NOCHAN( | NOCHAN( | NOCHAN( | NOCHAN( | NOCHAN( |
| NOCHAN( | NOCHAN( | NOCHAN( | NOCHAN( | DOWN    | UP      | NOCHAN( | UP      | NOCHAN( |
| NOCHAN( | NOCHAN( | NOCHAN( | NOCHAN( | NOCHAN( | NOCHAN( | NOCHAN( | UP      | NOCHAN( |
| NOCHAN( | NOCHAN( | UP      | UP      | UP      | NOCHAN( | UP      | NOCHAN( | UP      |
| UP      | NOCHAN( | UP      | UP      | UP      | UP      | UP      | NOCHAN( | NOCHAN( |
| DOWN    | DOWN    | DOWN    | NOCHAN( | DOWN    | DOWN    | DOWN    | DOWN    | DOWN    |
| DOWN    | NOCHAN( | NOCHAN( | NOCHAN( | NOCHAN( | DOWN    | NOCHAN( | DOWN    | NOCHAN( |
| DOWN    | DOWN    | DOWN    | DOWN    | NOCHAN( | NOCHAN( | NOCHAN( | DOWN    | DOWN    |
| NOCHAN( | NOCHAN( | NOCHAN( | NOCHAN( | DOWN    | NOCHAN( | NOCHAN( | NOCHAN( | DOWN    |
| UP      | UP      | NOCHAN( | UP      | UP      | UP      | UP      | UP      | UP      |
| NOCHAN( | DOWN    | NOCHAN( | DOWN    | NOCHAN( | NOCHAN( | NOCHAN( | NOCHAN( | NOCHAN( |
| NOCHAN( | NOCHAN( | NOCHAN( | NOCHAN( | NOCHAN( | NOCHAN( | NOCHAN( | NOCHAN( | NOCHAN( |
| NOCHAN( | NOCHAN( | NOCHAN( | NOCHAN( | NOCHAN( | NOCHAN( | NOCHAN( | NOCHAN( | NOCHAN( |
| NOCHAN( | DOWN    | NOCHAN( | DOWN    | DOWN    | NOCHAN( | NOCHAN( | DOWN    | NOCHAN( |
| NOCHAN( | NOCHAN( | NOCHAN( | NOCHAN( | NOCHAN( | NOCHAN( | NOCHAN( | NOCHAN( | NOCHAN( |
| NOCHAN( | NOCHAN( | DOWN    | NOCHAN( | DOWN    | NOCHAN( | DOWN    | NOCHAN( | DOWN    |
| NOCHAN( | NOCHAN( | NOCHAN( | NOCHAN( | NOCHAN( | NOCHAN( | NOCHAN( | NOCHAN( | NOCHAN( |
| NOCHAN( | DOWN    | NOCHAN( | NOCHAN( | NOCHAN( | NOCHAN( | NOCHAN( | NOCHAN( | NOCHAN( |
| NOCHAN( | NOCHAN( | UP      | NOCHAN( | NOCHAN( | NOCHAN( | UP      | UP      | UP      |
| NOCHAN( | NOCHAN( | NOCHAN( | NOCHAN( | NOCHAN( | NOCHAN( | NOCHAN( | NOCHAN( | NOCHAN( |
| NOCHAN( | UP      | NOCHAN( | NOCHAN( | DOWN    | NOCHAN( | NOCHAN( | NOCHAN( | NOCHAN( |
| DOWN    | DOWN    | NOCHAN( | NOCHAN( | NOCHAN( | NOCHAN( | NOCHAN( | NOCHAN( | NOCHAN( |
| DOWN    | DOWN    | NOCHAN( | DOWN    | NOCHAN( | DOWN    | DOWN    | DOWN    | DOWN    |
| UP      | NOCHAN( | NOCHAN( | UP      | NOCHAN( | NOCHAN( | NOCHAN( | UP      | NOCHAN( |
| NOCHAN( | NOCHAN( | UP      | DOWN    | UP      | NOCHAN( | NOCHAN( | UP      | UP      |
| UP      | NOCHAN( | UP      | NOCHAN( | UP      | UP      | UP      | NOCHAN( | UP      |

[illegible]

|          |          |          |          |          |          |          |          |          |
|----------|----------|----------|----------|----------|----------|----------|----------|----------|
| TCGA-CZ- | TCGA-BP- | TCGA-BP- | TCGA-BP- | TCGA-AK- | TCGA-A3- | TCGA-BP- | TCGA-B2- | TCGA-CJ- |
| DOWN     | DOWN     | NOCHAN(  | NOCHAN(  | DOWN     | DOWN     | DOWN     | NOCHAN(  | DOWN     |
| DOWN     | NOCHAN(  | NOCHAN(  | DOWN     | NOCHAN(  | DOWN     | DOWN     | NOCHAN(  | NOCHAN(  |
| DOWN     | NOCHAN(  | DOWN     | DOWN     | DOWN     | DOWN     | DOWN     | NOCHAN(  | NOCHAN(  |
| NOCHAN(  | NOCHAN(  | NOCHAN(  | UP       | NOCHAN(  | UP       | NOCHAN(  | NOCHAN(  | NOCHAN(  |
| NOCHAN(  | NOCHAN(  | NOCHAN(  | UP       | NOCHAN(  | DOWN     | DOWN     | UP       | NOCHAN(  |
| DOWN     | DOWN     | DOWN     | DOWN     | NOCHAN(  | DOWN     | DOWN     | NOCHAN(  | NOCHAN(  |
| DOWN     | DOWN     | NOCHAN(  | DOWN     | DOWN     | DOWN     | DOWN     | NOCHAN(  | DOWN     |
| NOCHAN(  | NOCHAN(  | NOCHAN(  | NOCHAN(  | NOCHAN(  | NOCHAN(  | DOWN     | NOCHAN(  | NOCHAN(  |
| UP       | NOCHAN(  | NOCHAN(  | UP       | NOCHAN(  | UP       | NOCHAN(  | DOWN     | UP       |
| DOWN     | NOCHAN(  | NOCHAN(  | DOWN     | NOCHAN(  | DOWN     | DOWN     | UP       | NOCHAN(  |
| NOCHAN(  | NOCHAN(  | UP       | NOCHAN(  | UP       | NOCHAN(  | NOCHAN(  | UP       | NOCHAN(  |
| NOCHAN(  | NOCHAN(  | NOCHAN(  | NOCHAN(  | NOCHAN(  | UP       | NOCHAN(  | DOWN     | NOCHAN(  |
| NOCHAN(  | DOWN     | NOCHAN(  | NOCHAN(  | NOCHAN(  | NOCHAN(  | NOCHAN(  | NOCHAN(  | NOCHAN(  |
| UP       | NOCHAN(  | NOCHAN(  | NOCHAN(  | NOCHAN(  | UP       | NOCHAN(  | DOWN     | NOCHAN(  |
| NOCHAN(  | NOCHAN(  | NOCHAN(  | NOCHAN(  | NOCHAN(  | NOCHAN(  | DOWN     | DOWN     | NOCHAN(  |
| UP       | NOCHAN(  | NOCHAN(  | NOCHAN(  | NOCHAN(  | UP       | UP       | DOWN     | NOCHAN(  |
| NOCHAN(  | NOCHAN(  | UP       | UP       | NOCHAN(  | NOCHAN(  | NOCHAN(  | UP       | NOCHAN(  |
| UP       | UP       | UP       | UP       | UP       | NOCHAN(  | NOCHAN(  | UP       | UP       |
| DOWN     | DOWN     | DOWN     | DOWN     | NOCHAN(  | DOWN     | NOCHAN(  | NOCHAN(  | DOWN     |
| DOWN     | DOWN     | NOCHAN(  | DOWN     | DOWN     | NOCHAN(  | DOWN     | NOCHAN(  | NOCHAN(  |
| DOWN     | DOWN     | NOCHAN(  | DOWN     | NOCHAN(  | DOWN     | DOWN     | UP       | NOCHAN(  |
| NOCHAN(  | NOCHAN(  | NOCHAN(  | NOCHAN(  | NOCHAN(  | NOCHAN(  | NOCHAN(  | DOWN     | DOWN     |
| UP       | NOCHAN(  | UP       | UP       | UP       | UP       | UP       | DOWN     | NOCHAN(  |
| DOWN     | NOCHAN(  | NOCHAN(  | NOCHAN(  | NOCHAN(  | NOCHAN(  | DOWN     | NOCHAN(  | NOCHAN(  |
| DOWN     | NOCHAN(  | NOCHAN(  | NOCHAN(  | NOCHAN(  | DOWN     | DOWN     | UP       | NOCHAN(  |
| NOCHAN(  | NOCHAN(  | NOCHAN(  | NOCHAN(  | NOCHAN(  | NOCHAN(  | NOCHAN(  | DOWN     | NOCHAN(  |
| DOWN     | NOCHAN(  | DOWN     | DOWN     | NOCHAN(  | DOWN     | DOWN     | NOCHAN(  | NOCHAN(  |
| NOCHAN(  | NOCHAN(  | NOCHAN(  | NOCHAN(  | NOCHAN(  | NOCHAN(  | NOCHAN(  | DOWN     | NOCHAN(  |
| DOWN     | NOCHAN(  | UP       | UP       | NOCHAN(  | NOCHAN(  | NOCHAN(  | DOWN     | UP       |
| NOCHAN(  | DOWN     | DOWN     | NOCHAN(  | NOCHAN(  | DOWN     | NOCHAN(  | DOWN     | NOCHAN(  |
| UP       | DOWN     | NOCHAN(  | NOCHAN(  | NOCHAN(  | UP       | NOCHAN(  | DOWN     | NOCHAN(  |
| DOWN     | NOCHAN(  | NOCHAN(  | NOCHAN(  | NOCHAN(  | DOWN     | NOCHAN(  | UP       | NOCHAN(  |
| NOCHAN(  | NOCHAN(  | UP       | NOCHAN(  | UP       | NOCHAN(  | NOCHAN(  | UP       | NOCHAN(  |
| UP       | NOCHAN(  | NOCHAN(  | NOCHAN(  | NOCHAN(  | UP       | UP       | DOWN     | NOCHAN(  |
| NOCHAN(  | NOCHAN(  | NOCHAN(  | NOCHAN(  | UP       | UP       | NOCHAN(  | DOWN     | NOCHAN(  |
| DOWN     | NOCHAN(  | NOCHAN(  | DOWN     | NOCHAN(  | NOCHAN(  | NOCHAN(  | NOCHAN(  | NOCHAN(  |
| DOWN     | DOWN     | DOWN     | DOWN     | NOCHAN(  | DOWN     | DOWN     | NOCHAN(  | DOWN     |
| NOCHAN(  | NOCHAN(  | NOCHAN(  | NOCHAN(  | UP       | UP       | UP       | UP       | NOCHAN(  |
| NOCHAN(  | UP       | UP       | NOCHAN(  | NOCHAN(  | NOCHAN(  | NOCHAN(  | NOCHAN(  | NOCHAN(  |
| NOCHAN(  | NOCHAN(  | UP       | UP       | UP       | NOCHAN(  | DOWN     | NOCHAN(  | UP       |

| TCGA-BP- | TCGA-CJ- | TCGA-BP- | TCGA-BP- | TCGA-CZ- | TCGA-B0- | TCGA-A3- | TCGA-CJ- | TCGA-BP- |
|----------|----------|----------|----------|----------|----------|----------|----------|----------|
| NOCHAN(  | DOWN     | NOCHAN(  | NOCHAN(  | DOWN     | NOCHAN(  | NOCHAN(  | DOWN     | NOCHAN(  |
| DOWN     | DOWN     | NOCHAN(  | NOCHAN(  | NOCHAN(  | NOCHAN(  | NOCHAN(  | DOWN     | DOWN     |
| DOWN     | DOWN     | DOWN     | DOWN     | DOWN     | DOWN     | DOWN     | DOWN     | DOWN     |
| NOCHAN(  | UP       | UP       | NOCHAN(  | NOCHAN(  | NOCHAN(  | NOCHAN(  | NOCHAN(  | NOCHAN(  |
| NOCHAN(  | DOWN     | UP       | NOCHAN(  | NOCHAN(  | NOCHAN(  | UP       | NOCHAN(  | NOCHAN(  |
| DOWN     | DOWN     | NOCHAN(  | DOWN     | DOWN     | DOWN     | NOCHAN(  | DOWN     | DOWN     |
| NOCHAN(  | DOWN     | DOWN     | NOCHAN(  | DOWN     | NOCHAN(  | NOCHAN(  | UP       | NOCHAN(  |
| NOCHAN(  | NOCHAN(  | NOCHAN(  | NOCHAN(  | NOCHAN(  | NOCHAN(  | NOCHAN(  | NOCHAN(  | NOCHAN(  |
| UP       | UP       | UP       | UP       | UP       | UP       | NOCHAN(  | NOCHAN(  | UP       |
| DOWN     | DOWN     | NOCHAN(  | NOCHAN(  | NOCHAN(  | NOCHAN(  | NOCHAN(  | NOCHAN(  | NOCHAN(  |
| NOCHAN(  | NOCHAN(  | NOCHAN(  | UP       | NOCHAN(  | UP       | UP       | UP       | UP       |
| UP       | NOCHAN(  | NOCHAN(  | NOCHAN(  | NOCHAN(  | NOCHAN(  | NOCHAN(  | NOCHAN(  | NOCHAN(  |
| NOCHAN(  | NOCHAN(  | NOCHAN(  | NOCHAN(  | NOCHAN(  | NOCHAN(  | NOCHAN(  | NOCHAN(  | NOCHAN(  |
| UP       | UP       | NOCHAN(  | NOCHAN(  | NOCHAN(  | NOCHAN(  | NOCHAN(  | NOCHAN(  | UP       |
| NOCHAN(  | NOCHAN(  | NOCHAN(  | NOCHAN(  | NOCHAN(  | NOCHAN(  | NOCHAN(  | DOWN     | NOCHAN(  |
| NOCHAN(  | NOCHAN(  | NOCHAN(  | NOCHAN(  | NOCHAN(  | NOCHAN(  | NOCHAN(  | NOCHAN(  | NOCHAN(  |
| NOCHAN(  | DOWN     | UP       | NOCHAN(  | NOCHAN(  | UP       | UP       | NOCHAN(  | NOCHAN(  |
| NOCHAN(  | UP       | NOCHAN(  | UP       | NOCHAN(  | NOCHAN(  | UP       | NOCHAN(  | NOCHAN(  |
| DOWN     | DOWN     | DOWN     | NOCHAN(  | DOWN     | NOCHAN(  | DOWN     | DOWN     | DOWN     |
| DOWN     | DOWN     | NOCHAN(  | NOCHAN(  | DOWN     | NOCHAN(  | DOWN     | NOCHAN(  | DOWN     |
| DOWN     | DOWN     | DOWN     | NOCHAN(  | NOCHAN(  | NOCHAN(  | NOCHAN(  | DOWN     | DOWN     |
| NOCHAN(  | NOCHAN(  | NOCHAN(  | NOCHAN(  | NOCHAN(  | NOCHAN(  | DOWN     | DOWN     | NOCHAN(  |
| UP       | UP       | NOCHAN(  | UP       | UP       | UP       | UP       | UP       | UP       |
| DOWN     | NOCHAN(  | NOCHAN(  | NOCHAN(  | NOCHAN(  | NOCHAN(  | NOCHAN(  | NOCHAN(  | NOCHAN(  |
| DOWN     | NOCHAN(  | NOCHAN(  | NOCHAN(  | NOCHAN(  | NOCHAN(  | NOCHAN(  | NOCHAN(  | NOCHAN(  |
| NOCHAN(  | NOCHAN(  | NOCHAN(  | NOCHAN(  | NOCHAN(  | NOCHAN(  | NOCHAN(  | NOCHAN(  | NOCHAN(  |
| DOWN     | DOWN     | NOCHAN(  | DOWN     | DOWN     | DOWN     | NOCHAN(  | DOWN     | NOCHAN(  |
| NOCHAN(  | NOCHAN(  | NOCHAN(  | NOCHAN(  | UP       | NOCHAN(  | NOCHAN(  | DOWN     | NOCHAN(  |
| NOCHAN(  | NOCHAN(  | NOCHAN(  | UP       | NOCHAN(  | NOCHAN(  | UP       | NOCHAN(  | NOCHAN(  |
| NOCHAN(  | NOCHAN(  | NOCHAN(  | DOWN     | DOWN     | NOCHAN(  | DOWN     | NOCHAN(  | NOCHAN(  |
| UP       | UP       | NOCHAN(  | NOCHAN(  | NOCHAN(  | NOCHAN(  | DOWN     | NOCHAN(  | NOCHAN(  |
| DOWN     | NOCHAN(  | NOCHAN(  | NOCHAN(  | DOWN     | NOCHAN(  | NOCHAN(  | NOCHAN(  | DOWN     |
| NOCHAN(  | NOCHAN(  | NOCHAN(  | NOCHAN(  | NOCHAN(  | UP       | UP       | NOCHAN(  | NOCHAN(  |
| UP       | NOCHAN(  | DOWN     | NOCHAN(  | NOCHAN(  | NOCHAN(  | NOCHAN(  | NOCHAN(  | NOCHAN(  |
| NOCHAN(  | NOCHAN(  | NOCHAN(  | UP       | NOCHAN(  | UP       | NOCHAN(  | DOWN     | DOWN     |
| NOCHAN(  | NOCHAN(  | NOCHAN(  | NOCHAN(  | NOCHAN(  | NOCHAN(  | NOCHAN(  | NOCHAN(  | NOCHAN(  |
| DOWN     | DOWN     | NOCHAN(  | DOWN     | DOWN     | DOWN     | DOWN     | DOWN     | DOWN     |
| UP       | UP       | NOCHAN(  | UP       | NOCHAN(  | UP       | NOCHAN(  | NOCHAN(  | UP       |
| NOCHAN(  | NOCHAN(  | NOCHAN(  | UP       | UP       | NOCHAN(  | UP       | UP       | NOCHAN(  |
| NOCHAN(  | NOCHAN(  | UP       | UP       | DOWN     | UP       | UP       | UP       | UP       |



| TCGA-A3- | TCGA-B8- | TCGA-B8- | TCGA-CZ- | TCGA-GK- | TCGA-BP- | TCGA-BP- | TCGA-B2- | TCGA-CZ- |
|----------|----------|----------|----------|----------|----------|----------|----------|----------|
| DOWN     | NOCHAN(  | DOWN     | DOWN     | DOWN     | DOWN     | DOWN     | DOWN     | DOWN     |
| DOWN     | DOWN     | NOCHAN(  | NOCHAN(  | DOWN     | DOWN     | DOWN     | NOCHAN(  | NOCHAN(  |
| DOWN     | NOCHAN(  | NOCHAN(  | NOCHAN(  | DOWN     | DOWN     | DOWN     | NOCHAN(  | NOCHAN(  |
| UP       | NOCHAN(  | NOCHAN(  | NOCHAN(  | UP       | UP       | NOCHAN(  | NOCHAN(  | NOCHAN(  |
| NOCHAN(  | NOCHAN(  | NOCHAN(  | NOCHAN(  | NOCHAN(  | UP       | NOCHAN(  | NOCHAN(  | NOCHAN(  |
| DOWN     | DOWN     | NOCHAN(  | DOWN     | DOWN     | DOWN     | DOWN     | DOWN     | NOCHAN(  |
| NOCHAN(  | NOCHAN(  | DOWN     | DOWN     | DOWN     | NOCHAN(  | NOCHAN(  | DOWN     | NOCHAN(  |
| NOCHAN(  | UP       | NOCHAN(  | NOCHAN(  | UP       | NOCHAN(  | NOCHAN(  | NOCHAN(  | NOCHAN(  |
| UP       | NOCHAN(  | DOWN     | NOCHAN(  | UP       | UP       | NOCHAN(  | UP       | NOCHAN(  |
| NOCHAN(  | NOCHAN(  | DOWN     | NOCHAN(  | DOWN     | DOWN     | NOCHAN(  | NOCHAN(  | NOCHAN(  |
| NOCHAN(  | NOCHAN(  | NOCHAN(  | NOCHAN(  | NOCHAN(  | NOCHAN(  | NOCHAN(  | NOCHAN(  | NOCHAN(  |
| NOCHAN(  | NOCHAN(  | DOWN     | NOCHAN(  | NOCHAN(  | NOCHAN(  | DOWN     | NOCHAN(  | NOCHAN(  |
| NOCHAN(  | NOCHAN(  | NOCHAN(  | NOCHAN(  | NOCHAN(  | NOCHAN(  | NOCHAN(  | NOCHAN(  | NOCHAN(  |
| UP       | NOCHAN(  | DOWN     | UP       | NOCHAN(  | NOCHAN(  | UP       | UP       | NOCHAN(  |
| NOCHAN(  | NOCHAN(  | NOCHAN(  | NOCHAN(  | NOCHAN(  | NOCHAN(  | DOWN     | UP       | NOCHAN(  |
| UP       | NOCHAN(  | NOCHAN(  | NOCHAN(  | NOCHAN(  | NOCHAN(  | NOCHAN(  | NOCHAN(  | NOCHAN(  |
| NOCHAN(  | NOCHAN(  | DOWN     | DOWN     | NOCHAN(  | NOCHAN(  | NOCHAN(  | NOCHAN(  | NOCHAN(  |
| NOCHAN(  | NOCHAN(  | NOCHAN(  | NOCHAN(  | UP       | NOCHAN(  | NOCHAN(  | NOCHAN(  | NOCHAN(  |
| NOCHAN(  | DOWN     | DOWN     | DOWN     | DOWN     | DOWN     | DOWN     | NOCHAN(  | NOCHAN(  |
| NOCHAN(  | DOWN     | DOWN     | NOCHAN(  | DOWN     | DOWN     | DOWN     | DOWN     | NOCHAN(  |
| DOWN     | DOWN     | DOWN     | DOWN     | DOWN     | DOWN     | DOWN     | DOWN     | DOWN     |
| NOCHAN(  | NOCHAN(  | DOWN     | NOCHAN(  | NOCHAN(  | NOCHAN(  | DOWN     | NOCHAN(  | NOCHAN(  |
| UP       | UP       | NOCHAN(  | UP       | UP       | UP       | UP       | UP       | UP       |
| NOCHAN(  | NOCHAN(  | DOWN     | NOCHAN(  | NOCHAN(  | DOWN     | NOCHAN(  | DOWN     | NOCHAN(  |
| NOCHAN(  | NOCHAN(  | NOCHAN(  | NOCHAN(  | NOCHAN(  | NOCHAN(  | NOCHAN(  | NOCHAN(  | NOCHAN(  |
| NOCHAN(  | NOCHAN(  | DOWN     | NOCHAN(  | NOCHAN(  | NOCHAN(  | DOWN     | NOCHAN(  | DOWN     |
| DOWN     | DOWN     | NOCHAN(  | DOWN     | DOWN     | DOWN     | NOCHAN(  | NOCHAN(  | NOCHAN(  |
| NOCHAN(  | NOCHAN(  | NOCHAN(  | NOCHAN(  | NOCHAN(  | NOCHAN(  | NOCHAN(  | NOCHAN(  | NOCHAN(  |
| NOCHAN(  | NOCHAN(  | NOCHAN(  | NOCHAN(  | UP       | NOCHAN(  | NOCHAN(  | NOCHAN(  | NOCHAN(  |
| NOCHAN(  | DOWN     | NOCHAN(  | NOCHAN(  | NOCHAN(  | NOCHAN(  | NOCHAN(  | NOCHAN(  | NOCHAN(  |
| UP       | NOCHAN(  | NOCHAN(  | NOCHAN(  | NOCHAN(  | UP       | DOWN     | UP       | NOCHAN(  |
| DOWN     | NOCHAN(  | NOCHAN(  | NOCHAN(  | NOCHAN(  | DOWN     | NOCHAN(  | NOCHAN(  | NOCHAN(  |
| NOCHAN(  | NOCHAN(  | UP       | UP       | NOCHAN(  | NOCHAN(  | NOCHAN(  | NOCHAN(  | UP       |
| UP       | DOWN     | DOWN     | NOCHAN(  | NOCHAN(  | NOCHAN(  | NOCHAN(  | NOCHAN(  | NOCHAN(  |
| NOCHAN(  | NOCHAN(  | UP       | NOCHAN(  | UP       | NOCHAN(  | DOWN     | NOCHAN(  | NOCHAN(  |
| NOCHAN(  | NOCHAN(  | DOWN     | NOCHAN(  | NOCHAN(  | NOCHAN(  | NOCHAN(  | NOCHAN(  | NOCHAN(  |
| DOWN     | NOCHAN(  | DOWN     | NOCHAN(  | NOCHAN(  | DOWN     | NOCHAN(  | NOCHAN(  | DOWN     |
| UP       | UP       | NOCHAN(  | UP       | NOCHAN(  | NOCHAN(  | UP       | UP       | UP       |
| NOCHAN(  | UP       | NOCHAN(  | UP       | UP       | NOCHAN(  | UP       | NOCHAN(  | UP       |
| UP       | NOCHAN(  | NOCHAN(  | NOCHAN(  | UP       | UP       | UP       | NOCHAN(  | NOCHAN(  |

| TCGA-CJ- | TCGA-B0- | TCGA-BP- | TCGA-B0- | TCGA-B8- | TCGA-B2- | TCGA-A3- | TCGA-CZ- | TCGA-CJ- |
|----------|----------|----------|----------|----------|----------|----------|----------|----------|
| NOCHAN(  | DOWN     | DOWN     | DOWN     | DOWN     | DOWN     | DOWN     | DOWN     | DOWN     |
| NOCHAN(  | DOWN     | DOWN     | NOCHAN(  | DOWN     | NOCHAN(  | DOWN     | NOCHAN(  | NOCHAN(  |
| DOWN     | DOWN     | DOWN     | DOWN     | DOWN     | NOCHAN(  | DOWN     | DOWN     | DOWN     |
| NOCHAN(  | UP       | NOCHAN(  | UP       | UP       | UP       | NOCHAN(  | NOCHAN(  | NOCHAN(  |
| NOCHAN(  | NOCHAN(  | DOWN     | NOCHAN(  | NOCHAN(  | NOCHAN(  | NOCHAN(  | NOCHAN(  | NOCHAN(  |
| DOWN     | DOWN     | DOWN     | DOWN     | NOCHAN(  | NOCHAN(  | DOWN     | DOWN     | NOCHAN(  |
| NOCHAN(  | DOWN     | NOCHAN(  | NOCHAN(  | DOWN     | NOCHAN(  | NOCHAN(  | DOWN     | NOCHAN(  |
| NOCHAN(  | UP       | NOCHAN(  | UP       | NOCHAN(  | UP       | NOCHAN(  | NOCHAN(  | NOCHAN(  |
| NOCHAN(  | UP       | UP       | UP       | UP       | NOCHAN(  | NOCHAN(  | NOCHAN(  | UP       |
| NOCHAN(  | DOWN     | DOWN     | DOWN     | DOWN     | NOCHAN(  | NOCHAN(  | DOWN     | NOCHAN(  |
| NOCHAN(  | UP       | NOCHAN(  | NOCHAN(  | UP       | NOCHAN(  | NOCHAN(  | NOCHAN(  | UP       |
| NOCHAN(  | UP       | NOCHAN(  | NOCHAN(  | NOCHAN(  | DOWN     | DOWN     | NOCHAN(  | NOCHAN(  |
| NOCHAN(  | NOCHAN(  | NOCHAN(  | DOWN     | NOCHAN(  | DOWN     | NOCHAN(  | NOCHAN(  | NOCHAN(  |
| NOCHAN(  | UP       | NOCHAN(  | UP       | NOCHAN(  | NOCHAN(  | NOCHAN(  | NOCHAN(  | NOCHAN(  |
| NOCHAN(  | NOCHAN(  | DOWN     | DOWN     | UP       | NOCHAN(  | DOWN     | NOCHAN(  | NOCHAN(  |
| UP       | UP       | UP       | NOCHAN(  | UP       | NOCHAN(  | NOCHAN(  | NOCHAN(  | NOCHAN(  |
| NOCHAN(  | NOCHAN(  | NOCHAN(  | DOWN     | NOCHAN(  | NOCHAN(  | NOCHAN(  | NOCHAN(  | UP       |
| NOCHAN(  | NOCHAN(  | NOCHAN(  | UP       | NOCHAN(  | UP       | NOCHAN(  | NOCHAN(  | UP       |
| NOCHAN(  | DOWN     | DOWN     | DOWN     | DOWN     | NOCHAN(  | DOWN     | DOWN     | NOCHAN(  |
| DOWN     | DOWN     | DOWN     | DOWN     | NOCHAN(  | NOCHAN(  | UP       | NOCHAN(  | NOCHAN(  |
| DOWN     | DOWN     | DOWN     | DOWN     | DOWN     | NOCHAN(  | DOWN     | DOWN     | NOCHAN(  |
| NOCHAN(  | NOCHAN(  | NOCHAN(  | NOCHAN(  | NOCHAN(  | DOWN     | NOCHAN(  | NOCHAN(  | NOCHAN(  |
| UP       | UP       | UP       | UP       | UP       | UP       | UP       | UP       | UP       |
| NOCHAN(  | DOWN     | DOWN     | NOCHAN(  | DOWN     | NOCHAN(  | NOCHAN(  | DOWN     | NOCHAN(  |
| NOCHAN(  | DOWN     | DOWN     | NOCHAN(  | NOCHAN(  | NOCHAN(  | NOCHAN(  | NOCHAN(  | NOCHAN(  |
| NOCHAN(  | NOCHAN(  | DOWN     | NOCHAN(  | NOCHAN(  | NOCHAN(  | NOCHAN(  | NOCHAN(  | NOCHAN(  |
| DOWN     | DOWN     | DOWN     | DOWN     | DOWN     | NOCHAN(  | NOCHAN(  | DOWN     | NOCHAN(  |
| NOCHAN(  | UP       | NOCHAN(  | NOCHAN(  | NOCHAN(  | DOWN     | NOCHAN(  | NOCHAN(  | NOCHAN(  |
| NOCHAN(  | NOCHAN(  | NOCHAN(  | NOCHAN(  | UP       | UP       | NOCHAN(  | NOCHAN(  | NOCHAN(  |
| NOCHAN(  | NOCHAN(  | NOCHAN(  | NOCHAN(  | NOCHAN(  | NOCHAN(  | NOCHAN(  | NOCHAN(  | NOCHAN(  |
| DOWN     | UP       | NOCHAN(  | UP       | NOCHAN(  | DOWN     | NOCHAN(  | NOCHAN(  | NOCHAN(  |
| NOCHAN(  | DOWN     | DOWN     | NOCHAN(  | NOCHAN(  | NOCHAN(  | NOCHAN(  | NOCHAN(  | NOCHAN(  |
| NOCHAN(  | NOCHAN(  | NOCHAN(  | NOCHAN(  | NOCHAN(  | UP       | UP       | NOCHAN(  | UP       |
| NOCHAN(  | NOCHAN(  | UP       | NOCHAN(  | NOCHAN(  | NOCHAN(  | NOCHAN(  | NOCHAN(  | NOCHAN(  |
| UP       | DOWN     | NOCHAN(  | NOCHAN(  | UP       | NOCHAN(  | DOWN     | NOCHAN(  | UP       |
| NOCHAN(  | DOWN     | NOCHAN(  | DOWN     | NOCHAN(  | DOWN     | NOCHAN(  | DOWN     | NOCHAN(  |
| NOCHAN(  | DOWN     | DOWN     | DOWN     | DOWN     | NOCHAN(  | DOWN     | DOWN     | DOWN     |
| NOCHAN(  | NOCHAN(  | NOCHAN(  | NOCHAN(  | NOCHAN(  | NOCHAN(  | NOCHAN(  | NOCHAN(  | UP       |
| UP       | NOCHAN(  | NOCHAN(  | NOCHAN(  | NOCHAN(  | UP       | UP       | NOCHAN(  | NOCHAN(  |
| NOCHAN(  | NOCHAN(  | NOCHAN(  | NOCHAN(  | UP       | UP       | UP       | NOCHAN(  | UP       |

| TCGA-CJ- | TCGA-BP- | TCGA-CJ- | TCGA-CJ- | TCGA-CJ- | TCGA-CW | TCGA-A3- | TCGA-CJ- | TCGA-CJ- |
|----------|----------|----------|----------|----------|---------|----------|----------|----------|
| DOWN     | DOWN     | DOWN     | DOWN     | DOWN     | DOWN    | NOCHAN   | DOWN     | DOWN     |
| NOCHAN   | NOCHAN   | DOWN     | DOWN     | NOCHAN   | NOCHAN  | NOCHAN   | NOCHAN   | NOCHAN   |
| NOCHAN   | DOWN     | DOWN     | DOWN     | DOWN     | DOWN    | DOWN     | DOWN     | NOCHAN   |
| NOCHAN   | UP       | UP       | UP       | UP       | NOCHAN  | UP       | NOCHAN   | NOCHAN   |
| NOCHAN   | NOCHAN   | UP       | UP       | NOCHAN   | DOWN    | NOCHAN   | DOWN     | NOCHAN   |
| NOCHAN   | DOWN     | DOWN     | DOWN     | NOCHAN   | DOWN    | DOWN     | NOCHAN   | NOCHAN   |
| NOCHAN   | NOCHAN   | DOWN     | DOWN     | NOCHAN   | NOCHAN  | NOCHAN   | DOWN     | DOWN     |
| UP       | NOCHAN   | NOCHAN   | NOCHAN   | NOCHAN   | NOCHAN  | NOCHAN   | NOCHAN   | NOCHAN   |
| NOCHAN   | UP       | UP       | UP       | UP       | UP      | UP       | NOCHAN   | UP       |
| NOCHAN   | DOWN     | DOWN     | DOWN     | DOWN     | DOWN    | DOWN     | NOCHAN   | DOWN     |
| NOCHAN   | NOCHAN   | NOCHAN   | UP       | NOCHAN   | NOCHAN  | NOCHAN   | NOCHAN   | NOCHAN   |
| DOWN     | NOCHAN   | DOWN     | NOCHAN   | NOCHAN   | NOCHAN  | NOCHAN   | NOCHAN   | NOCHAN   |
| NOCHAN   | NOCHAN   | NOCHAN   | NOCHAN   | NOCHAN   | NOCHAN  | NOCHAN   | NOCHAN   | NOCHAN   |
| NOCHAN   | NOCHAN   | UP       | UP       | NOCHAN   | UP      | UP       | UP       | NOCHAN   |
| NOCHAN   | DOWN     | DOWN     | DOWN     | NOCHAN   | NOCHAN  | NOCHAN   | NOCHAN   | NOCHAN   |
| NOCHAN   | NOCHAN   | NOCHAN   | NOCHAN   | UP       | UP      | NOCHAN   | NOCHAN   | UP       |
| NOCHAN   | NOCHAN   | NOCHAN   | NOCHAN   | UP       | DOWN    | NOCHAN   | DOWN     | NOCHAN   |
| UP       | NOCHAN   | NOCHAN   | NOCHAN   | UP       | NOCHAN  | UP       | NOCHAN   | NOCHAN   |
| NOCHAN   | DOWN     | DOWN     | DOWN     | DOWN     | DOWN    | DOWN     | DOWN     | NOCHAN   |
| NOCHAN   | DOWN     | DOWN     | DOWN     | NOCHAN   | DOWN    | NOCHAN   | NOCHAN   | DOWN     |
| NOCHAN   | DOWN     | DOWN     | DOWN     | DOWN     | DOWN    | NOCHAN   | DOWN     | DOWN     |
| DOWN     | NOCHAN   | NOCHAN   | NOCHAN   | NOCHAN   | DOWN    | NOCHAN   | NOCHAN   | NOCHAN   |
| UP       | UP       | UP       | UP       | NOCHAN   | UP      | NOCHAN   | UP       | UP       |
| NOCHAN   | NOCHAN   | DOWN     | DOWN     | NOCHAN   | DOWN    | NOCHAN   | DOWN     | NOCHAN   |
| NOCHAN   | NOCHAN   | NOCHAN   | NOCHAN   | NOCHAN   | NOCHAN  | NOCHAN   | DOWN     | NOCHAN   |
| NOCHAN   | NOCHAN   | NOCHAN   | NOCHAN   | NOCHAN   | NOCHAN  | NOCHAN   | NOCHAN   | NOCHAN   |
| NOCHAN   | DOWN     | DOWN     | DOWN     | DOWN     | DOWN    | DOWN     | DOWN     | DOWN     |
| NOCHAN   | NOCHAN   | DOWN     | NOCHAN   | NOCHAN   | NOCHAN  | NOCHAN   | NOCHAN   | UP       |
| NOCHAN   | NOCHAN   | NOCHAN   | NOCHAN   | NOCHAN   | NOCHAN  | UP       | NOCHAN   | DOWN     |
| NOCHAN   | NOCHAN   | DOWN     | DOWN     | DOWN     | NOCHAN  | NOCHAN   | NOCHAN   | NOCHAN   |
| DOWN     | NOCHAN   | NOCHAN   | UP       | NOCHAN   | NOCHAN  | NOCHAN   | NOCHAN   | UP       |
| NOCHAN   | DOWN     | DOWN     | DOWN     | NOCHAN   | NOCHAN  | NOCHAN   | NOCHAN   | DOWN     |
| UP       | NOCHAN   | UP       | NOCHAN   | NOCHAN   | NOCHAN  | UP       | NOCHAN   | NOCHAN   |
| DOWN     | NOCHAN   | UP       | UP       | NOCHAN   | NOCHAN  | NOCHAN   | NOCHAN   | NOCHAN   |
| NOCHAN   | NOCHAN   | DOWN     | NOCHAN   | NOCHAN   | NOCHAN  | NOCHAN   | NOCHAN   | UP       |
| NOCHAN   | DOWN     | DOWN     | NOCHAN   | NOCHAN   | NOCHAN  | NOCHAN   | NOCHAN   | NOCHAN   |
| DOWN     | DOWN     | DOWN     | DOWN     | DOWN     | DOWN    | DOWN     | DOWN     | DOWN     |
| UP       | NOCHAN   | NOCHAN   | NOCHAN   | NOCHAN   | NOCHAN  | NOCHAN   | NOCHAN   | UP       |
| UP       | NOCHAN   | NOCHAN   | NOCHAN   | UP       | UP      | UP       | UP       | NOCHAN   |
| NOCHAN   | UP       | NOCHAN   | UP       | UP       | UP      | UP       | NOCHAN   | DOWN     |

| TCGA-BP | TCGA-B0 | TCGA-CZ | TCGA-A3 | TCGA-CZ | TCGA-B2 | TCGA-BP | TCGA-B8 | TCGA-BP |
|---------|---------|---------|---------|---------|---------|---------|---------|---------|
| DOWN    | NOCHAN  | NOCHAN  | UP      | DOWN    | NOCHAN  | NOCHAN  | NOCHAN  | DOWN    |
| NOCHAN  | DOWN    | DOWN    | NOCHAN  | NOCHAN  | DOWN    | NOCHAN  | NOCHAN  | DOWN    |
| NOCHAN  | DOWN    | DOWN    | NOCHAN  | DOWN    | NOCHAN  | DOWN    | DOWN    | DOWN    |
| NOCHAN  | NOCHAN  | NOCHAN  | NOCHAN  | NOCHAN  | NOCHAN  | NOCHAN  | NOCHAN  | NOCHAN  |
| NOCHAN  | NOCHAN  | NOCHAN  | UP      | NOCHAN  | UP      | NOCHAN  | NOCHAN  | NOCHAN  |
| NOCHAN  | DOWN    | NOCHAN  | NOCHAN  | DOWN    | UP      | DOWN    | DOWN    | DOWN    |
| DOWN    | NOCHAN  | DOWN    | NOCHAN  | NOCHAN  | UP      | DOWN    | DOWN    | NOCHAN  |
| NOCHAN  | NOCHAN  | NOCHAN  | NOCHAN  | UP      | UP      | NOCHAN  | UP      | UP      |
| NOCHAN  | UP      | NOCHAN  | NOCHAN  | UP      | DOWN    | UP      | UP      | UP      |
| NOCHAN  | NOCHAN  | NOCHAN  | DOWN    | DOWN    | UP      | NOCHAN  | NOCHAN  | DOWN    |
| NOCHAN  | NOCHAN  | NOCHAN  | UP      | NOCHAN  | UP      | NOCHAN  | NOCHAN  | NOCHAN  |
| NOCHAN  | DOWN    | NOCHAN  | NOCHAN  | NOCHAN  | DOWN    | NOCHAN  | NOCHAN  | UP      |
| NOCHAN  | NOCHAN  | DOWN    | NOCHAN  | NOCHAN  | NOCHAN  | NOCHAN  | NOCHAN  | DOWN    |
| NOCHAN  | UP      | NOCHAN  | UP      | NOCHAN  | DOWN    | NOCHAN  | NOCHAN  | UP      |
| DOWN    | NOCHAN  | NOCHAN  | DOWN    | UP      | DOWN    | NOCHAN  | NOCHAN  | NOCHAN  |
| UP      | NOCHAN  | UP      | UP      | NOCHAN  | DOWN    | UP      | NOCHAN  | NOCHAN  |
| NOCHAN  | NOCHAN  | NOCHAN  | NOCHAN  | NOCHAN  | UP      | NOCHAN  | NOCHAN  | DOWN    |
| NOCHAN  | NOCHAN  | NOCHAN  | NOCHAN  | NOCHAN  | UP      | UP      | NOCHAN  | UP      |
| NOCHAN  | DOWN    | DOWN    | NOCHAN  | DOWN    | DOWN    | DOWN    | DOWN    | DOWN    |
| DOWN    | DOWN    | NOCHAN  | UP      | DOWN    | NOCHAN  | NOCHAN  | DOWN    | DOWN    |
| NOCHAN  | DOWN    | DOWN    | NOCHAN  | DOWN    | UP      | NOCHAN  | DOWN    | DOWN    |
| NOCHAN  | NOCHAN  | NOCHAN  | NOCHAN  | NOCHAN  | DOWN    | NOCHAN  | NOCHAN  | NOCHAN  |
| UP      | UP      | UP      | UP      | UP      | NOCHAN  | UP      | UP      | UP      |
| NOCHAN  | NOCHAN  | NOCHAN  | NOCHAN  | DOWN    | NOCHAN  | NOCHAN  | DOWN    | DOWN    |
| NOCHAN  | NOCHAN  | DOWN    | UP      | NOCHAN  | UP      | NOCHAN  | NOCHAN  | DOWN    |
| NOCHAN  | NOCHAN  | NOCHAN  | NOCHAN  | DOWN    | NOCHAN  | NOCHAN  | NOCHAN  | NOCHAN  |
| DOWN    | DOWN    | DOWN    | DOWN    | DOWN    | NOCHAN  | DOWN    | NOCHAN  | DOWN    |
| NOCHAN  | NOCHAN  | NOCHAN  | UP      | NOCHAN  | DOWN    | NOCHAN  | NOCHAN  | NOCHAN  |
| UP      | DOWN    | NOCHAN  | NOCHAN  | NOCHAN  | NOCHAN  | NOCHAN  | NOCHAN  | DOWN    |
| NOCHAN  | NOCHAN  | NOCHAN  | UP      | UP      | NOCHAN  | DOWN    | NOCHAN  | NOCHAN  |
| NOCHAN  | NOCHAN  | NOCHAN  | NOCHAN  | UP      | DOWN    | NOCHAN  | NOCHAN  | UP      |
| NOCHAN  | NOCHAN  | NOCHAN  | NOCHAN  | DOWN    | UP      | NOCHAN  | NOCHAN  | DOWN    |
| NOCHAN  | NOCHAN  | UP      | NOCHAN  | UP      | UP      | NOCHAN  | NOCHAN  | DOWN    |
| NOCHAN  | NOCHAN  | NOCHAN  | UP      | UP      | DOWN    | NOCHAN  | NOCHAN  | UP      |
| NOCHAN  | DOWN    | UP      | NOCHAN  | NOCHAN  | DOWN    | UP      | NOCHAN  | NOCHAN  |
| NOCHAN  | DOWN    | NOCHAN  | NOCHAN  | DOWN    | UP      | NOCHAN  | NOCHAN  | DOWN    |
| NOCHAN  | DOWN    | DOWN    | NOCHAN  | DOWN    | DOWN    | DOWN    | DOWN    | DOWN    |
| NOCHAN  | NOCHAN  | NOCHAN  | UP      | UP      | NOCHAN  | NOCHAN  | NOCHAN  | UP      |
| UP      | UP      | UP      | NOCHAN  | DOWN    | UP      | UP      | UP      | DOWN    |
| NOCHAN  | UP      | UP      | NOCHAN  | NOCHAN  | NOCHAN  | NOCHAN  | UP      | NOCHAN  |

| TCGA-B2- | TCGA-A3- | TCGA-CZ- | TCGA-AK- | TCGA-CZ- | TCGA-B0- | TCGA-CZ- | TCGA-CJ- | TCGA-AK- |
|----------|----------|----------|----------|----------|----------|----------|----------|----------|
| DOWN     | NOCHAN(  | NOCHAN(  | NOCHAN(  | DOWN     | DOWN     | DOWN     | DOWN     | DOWN     |
| DOWN     | NOCHAN(  | NOCHAN(  | DOWN     | DOWN     | NOCHAN(  | DOWN     | DOWN     | NOCHAN(  |
| NOCHAN(  | DOWN     | NOCHAN(  | DOWN     | DOWN     | DOWN     | DOWN     | DOWN     | DOWN     |
| NOCHAN(  | NOCHAN(  | NOCHAN(  | NOCHAN(  | NOCHAN(  | NOCHAN(  | NOCHAN(  | NOCHAN(  | NOCHAN(  |
| DOWN     | NOCHAN(  | UP       | DOWN     | NOCHAN(  | NOCHAN(  | NOCHAN(  | NOCHAN(  | DOWN     |
| UP       | DOWN     | NOCHAN(  | DOWN     | DOWN     | DOWN     | DOWN     | DOWN     | NOCHAN(  |
| DOWN     | DOWN     | DOWN     | NOCHAN(  | NOCHAN(  | DOWN     | NOCHAN(  | DOWN     | DOWN     |
| DOWN     | NOCHAN(  | NOCHAN(  | NOCHAN(  | NOCHAN(  | NOCHAN(  | NOCHAN(  | NOCHAN(  | NOCHAN(  |
| DOWN     | NOCHAN(  | UP       | UP       | UP       | UP       | NOCHAN(  | UP       | NOCHAN(  |
| UP       | NOCHAN(  | NOCHAN(  | DOWN     | NOCHAN(  | DOWN     | NOCHAN(  | DOWN     | NOCHAN(  |
| NOCHAN(  | NOCHAN(  | UP       | NOCHAN(  | NOCHAN(  | NOCHAN(  | NOCHAN(  | NOCHAN(  | NOCHAN(  |
| DOWN     | NOCHAN(  | NOCHAN(  | NOCHAN(  | NOCHAN(  | NOCHAN(  | NOCHAN(  | NOCHAN(  | NOCHAN(  |
| NOCHAN(  | NOCHAN(  | NOCHAN(  | NOCHAN(  | NOCHAN(  | DOWN     | NOCHAN(  | DOWN     | DOWN     |
| DOWN     | UP       | NOCHAN(  | UP       | UP       | NOCHAN(  | NOCHAN(  | UP       | NOCHAN(  |
| DOWN     | NOCHAN(  | DOWN     | DOWN     | NOCHAN(  | NOCHAN(  | NOCHAN(  | NOCHAN(  | NOCHAN(  |
| NOCHAN(  | UP       | NOCHAN(  | UP       | NOCHAN(  | UP       | UP       | NOCHAN(  | UP       |
| NOCHAN(  | NOCHAN(  | UP       | DOWN     | DOWN     | NOCHAN(  | NOCHAN(  | DOWN     | DOWN     |
| UP       | NOCHAN(  | NOCHAN(  | NOCHAN(  | NOCHAN(  | NOCHAN(  | NOCHAN(  | NOCHAN(  | NOCHAN(  |
| NOCHAN(  | NOCHAN(  | DOWN     | DOWN     | DOWN     | DOWN     | DOWN     | DOWN     | NOCHAN(  |
| NOCHAN(  | NOCHAN(  | DOWN     | DOWN     | DOWN     | DOWN     | DOWN     | DOWN     | NOCHAN(  |
| NOCHAN(  | NOCHAN(  | DOWN     | DOWN     | DOWN     | DOWN     | DOWN     | DOWN     | NOCHAN(  |
| DOWN     | NOCHAN(  | NOCHAN(  | NOCHAN(  | NOCHAN(  | DOWN     | NOCHAN(  | DOWN     | DOWN     |
| UP       | UP       | NOCHAN(  | UP       | UP       | UP       | UP       | UP       | UP       |
| NOCHAN(  | NOCHAN(  | NOCHAN(  | NOCHAN(  | DOWN     | DOWN     | DOWN     | NOCHAN(  | NOCHAN(  |
| UP       | NOCHAN(  | UP       | DOWN     | NOCHAN(  | NOCHAN(  | NOCHAN(  | NOCHAN(  | NOCHAN(  |
| DOWN     | NOCHAN(  | NOCHAN(  | NOCHAN(  | NOCHAN(  | NOCHAN(  | DOWN     | NOCHAN(  | DOWN     |
| NOCHAN(  | DOWN     | DOWN     | DOWN     | DOWN     | DOWN     | DOWN     | DOWN     | DOWN     |
| UP       | NOCHAN(  | NOCHAN(  | UP       | NOCHAN(  | NOCHAN(  | NOCHAN(  | DOWN     | NOCHAN(  |
| NOCHAN(  | NOCHAN(  | NOCHAN(  | DOWN     | NOCHAN(  | NOCHAN(  | NOCHAN(  | NOCHAN(  | NOCHAN(  |
| NOCHAN(  | NOCHAN(  | DOWN     | NOCHAN(  | NOCHAN(  | NOCHAN(  | NOCHAN(  | NOCHAN(  | NOCHAN(  |
| NOCHAN(  | NOCHAN(  | NOCHAN(  | NOCHAN(  | NOCHAN(  | NOCHAN(  | NOCHAN(  | NOCHAN(  | NOCHAN(  |
| UP       | NOCHAN(  | NOCHAN(  | NOCHAN(  | DOWN     | NOCHAN(  | NOCHAN(  | NOCHAN(  | NOCHAN(  |
| UP       | NOCHAN(  | UP       | NOCHAN(  | NOCHAN(  | UP       | UP       | NOCHAN(  | UP       |
| UP       | NOCHAN(  | NOCHAN(  | UP       | NOCHAN(  | NOCHAN(  | NOCHAN(  | NOCHAN(  | NOCHAN(  |
| DOWN     | NOCHAN(  | NOCHAN(  | NOCHAN(  | NOCHAN(  | UP       | UP       | NOCHAN(  | UP       |
| NOCHAN(  | NOCHAN(  | NOCHAN(  | DOWN     | NOCHAN(  | DOWN     | NOCHAN(  | NOCHAN(  | NOCHAN(  |
| NOCHAN(  | DOWN     | NOCHAN(  | DOWN     | DOWN     | DOWN     | DOWN     | DOWN     | DOWN     |
| NOCHAN(  | NOCHAN(  | NOCHAN(  | NOCHAN(  | UP       | NOCHAN(  | NOCHAN(  | NOCHAN(  | NOCHAN(  |
| UP       | UP       | UP       | UP       | UP       | NOCHAN(  | UP       | NOCHAN(  | UP       |
| DOWN     | NOCHAN(  | UP       | NOCHAN(  | NOCHAN(  | NOCHAN(  | NOCHAN(  | UP       | NOCHAN(  |

| TCGA-B0-NOCHAN | TCGA-A3-NOCHAN | TCGA-B8-DOWN | TCGA-CJ-DOWN | TCGA-BP-NOCHAN | TCGA-A3-DOWN | TCGA-MV-DOWN | TCGA-B0-DOWN | TCGA-CZ-NOCHAN |
|----------------|----------------|--------------|--------------|----------------|--------------|--------------|--------------|----------------|
| DOWN           | NOCHAN         | NOCHAN       | NOCHAN       | DOWN           | NOCHAN       | NOCHAN       | NOCHAN       | NOCHAN         |
| DOWN           | DOWN           | NOCHAN       | DOWN         | NOCHAN         | DOWN         | DOWN         | DOWN         | DOWN           |
| NOCHAN         | NOCHAN         | NOCHAN       | NOCHAN       | NOCHAN         | NOCHAN       | NOCHAN       | UP           | NOCHAN         |
| NOCHAN         | NOCHAN         | NOCHAN       | NOCHAN       | UP             | NOCHAN       | NOCHAN       | NOCHAN       | NOCHAN         |
| DOWN           | NOCHAN         | NOCHAN       | NOCHAN       | NOCHAN         | DOWN         | NOCHAN       | DOWN         | NOCHAN         |
| NOCHAN         | DOWN           | DOWN         | NOCHAN       | UP             | NOCHAN       | DOWN         | NOCHAN       | DOWN           |
| DOWN           | UP             | NOCHAN       | UP           | UP             | NOCHAN       | NOCHAN       | NOCHAN       | NOCHAN         |
| UP             | NOCHAN         | NOCHAN       | UP           | NOCHAN         | UP           | UP           | UP           | UP             |
| DOWN           | DOWN           | NOCHAN       | DOWN         | NOCHAN         | NOCHAN       | NOCHAN       | DOWN         | NOCHAN         |
| UP             | UP             | NOCHAN       | NOCHAN       | UP             | NOCHAN       | NOCHAN       | UP           | UP             |
| DOWN           | NOCHAN         | NOCHAN       | NOCHAN       | NOCHAN         | DOWN         | NOCHAN       | NOCHAN       | NOCHAN         |
| NOCHAN         | UP             | NOCHAN       | NOCHAN       | UP             | NOCHAN       | NOCHAN       | DOWN         | NOCHAN         |
| NOCHAN         | NOCHAN         | NOCHAN       | NOCHAN       | UP             | UP           | NOCHAN       | NOCHAN       | NOCHAN         |
| DOWN           | NOCHAN         | NOCHAN       | DOWN         | NOCHAN         | UP           | NOCHAN       | NOCHAN       | NOCHAN         |
| UP             | NOCHAN         | NOCHAN       | NOCHAN       | NOCHAN         | DOWN         | UP           | UP           | NOCHAN         |
| UP             | NOCHAN         | NOCHAN       | DOWN         | UP             | DOWN         | NOCHAN       | NOCHAN       | NOCHAN         |
| NOCHAN         | UP             | UP           | NOCHAN       | UP             | UP           | NOCHAN       | UP           | NOCHAN         |
| DOWN           | NOCHAN         | DOWN         | NOCHAN       | DOWN           | DOWN         | NOCHAN       | DOWN         | NOCHAN         |
| NOCHAN         | NOCHAN         | DOWN         | DOWN         | DOWN           | DOWN         | NOCHAN       | NOCHAN       | DOWN           |
| DOWN           | NOCHAN         | NOCHAN       | DOWN         | NOCHAN         | DOWN         | DOWN         | DOWN         | DOWN           |
| NOCHAN         | DOWN           | NOCHAN       | NOCHAN       | NOCHAN         | NOCHAN       | NOCHAN       | NOCHAN       | NOCHAN         |
| UP             | UP             | UP           | UP           | UP             | UP           | UP           | UP           | UP             |
| DOWN           | NOCHAN         | NOCHAN       | NOCHAN       | NOCHAN         | NOCHAN       | NOCHAN       | NOCHAN       | NOCHAN         |
| NOCHAN         | NOCHAN         | NOCHAN       | NOCHAN       | NOCHAN         | NOCHAN       | NOCHAN       | NOCHAN       | NOCHAN         |
| NOCHAN         | NOCHAN         | NOCHAN       | DOWN         | NOCHAN         | NOCHAN       | NOCHAN       | NOCHAN       | NOCHAN         |
| DOWN           | DOWN           | NOCHAN       | DOWN         | NOCHAN         | NOCHAN       | DOWN         | DOWN         | DOWN           |
| DOWN           | NOCHAN         | NOCHAN       | NOCHAN       | NOCHAN         | UP           | NOCHAN       | DOWN         | NOCHAN         |
| NOCHAN         | NOCHAN         | NOCHAN       | DOWN         | NOCHAN         | DOWN         | UP           | UP           | NOCHAN         |
| DOWN           | UP             | NOCHAN       | NOCHAN       | NOCHAN         | NOCHAN       | NOCHAN       | NOCHAN       | NOCHAN         |
| NOCHAN         | NOCHAN         | NOCHAN       | UP           | UP             | NOCHAN       | UP           | NOCHAN       | NOCHAN         |
| DOWN           | NOCHAN         | NOCHAN       | NOCHAN       | DOWN           | DOWN         | NOCHAN       | NOCHAN       | NOCHAN         |
| NOCHAN         | UP             | NOCHAN       | UP           | UP             | NOCHAN       | NOCHAN       | NOCHAN       | NOCHAN         |
| NOCHAN         | DOWN           | NOCHAN       | NOCHAN       | NOCHAN         | DOWN         | UP           | NOCHAN       | NOCHAN         |
| DOWN           | NOCHAN         | NOCHAN       | NOCHAN       | NOCHAN         | DOWN         | UP           | UP           | UP             |
| NOCHAN         | NOCHAN         | NOCHAN       | DOWN         | UP             | DOWN         | NOCHAN       | DOWN         | NOCHAN         |
| DOWN           | NOCHAN         | DOWN         | DOWN         | NOCHAN         | DOWN         | DOWN         | DOWN         | DOWN           |
| NOCHAN         | NOCHAN         | NOCHAN       | UP           | UP             | NOCHAN       | NOCHAN       | UP           | NOCHAN         |
| NOCHAN         | UP             | UP           | NOCHAN       | NOCHAN         | NOCHAN       | NOCHAN       | NOCHAN       | NOCHAN         |
| UP             | NOCHAN         | UP           | NOCHAN       | UP             | UP           | NOCHAN       | NOCHAN       | NOCHAN         |

| TCGA-B0- | TCGA-CZ- | TCGA-B0- | TCGA-B8- | TCGA-EU- | TCGA-CJ- | TCGA-B0- | TCGA-B0- | TCGA-B0- |
|----------|----------|----------|----------|----------|----------|----------|----------|----------|
| DOWN     | DOWN     | NOCHAN(  | NOCHAN(  | DOWN     | NOCHAN(  | DOWN     | DOWN     | DOWN     |
| NOCHAN(  | DOWN     | DOWN     | DOWN     | NOCHAN(  | NOCHAN(  | DOWN     | DOWN     | DOWN     |
| DOWN     | DOWN     | DOWN     | DOWN     | DOWN     | DOWN     | DOWN     | DOWN     | DOWN     |
| NOCHAN(  | NOCHAN(  | NOCHAN(  | NOCHAN(  | NOCHAN(  | NOCHAN(  | NOCHAN(  | NOCHAN(  | UP       |
| NOCHAN(  | NOCHAN(  | NOCHAN(  | NOCHAN(  | NOCHAN(  | NOCHAN(  | NOCHAN(  | UP       | NOCHAN(  |
| NOCHAN(  | NOCHAN(  | DOWN     | NOCHAN(  | DOWN     | DOWN     | NOCHAN(  | DOWN     | DOWN     |
| NOCHAN(  | NOCHAN(  | DOWN     | NOCHAN(  | DOWN     | NOCHAN(  | NOCHAN(  | NOCHAN(  | DOWN     |
| NOCHAN(  | NOCHAN(  | NOCHAN(  | NOCHAN(  | NOCHAN(  | NOCHAN(  | NOCHAN(  | NOCHAN(  | NOCHAN(  |
| NOCHAN(  | NOCHAN(  | UP       | UP       | NOCHAN(  | NOCHAN(  | NOCHAN(  | UP       | UP       |
| NOCHAN(  | UP       | NOCHAN(  | NOCHAN(  | DOWN     | NOCHAN(  | NOCHAN(  | DOWN     | DOWN     |
| UP       | NOCHAN(  | UP       | NOCHAN(  | NOCHAN(  | UP       | NOCHAN(  | UP       | NOCHAN(  |
| NOCHAN(  | NOCHAN(  | NOCHAN(  | UP       | DOWN     | NOCHAN(  | NOCHAN(  | NOCHAN(  | NOCHAN(  |
| NOCHAN(  | NOCHAN(  | NOCHAN(  | NOCHAN(  | NOCHAN(  | NOCHAN(  | NOCHAN(  | NOCHAN(  | DOWN     |
| NOCHAN(  | DOWN     | UP       | NOCHAN(  | NOCHAN(  | NOCHAN(  | NOCHAN(  | UP       | NOCHAN(  |
| NOCHAN(  | DOWN     | NOCHAN(  | NOCHAN(  | NOCHAN(  | NOCHAN(  | NOCHAN(  | NOCHAN(  | NOCHAN(  |
| NOCHAN(  | NOCHAN(  | NOCHAN(  | UP       | NOCHAN(  | NOCHAN(  | NOCHAN(  | NOCHAN(  | NOCHAN(  |
| UP       | UP       | UP       | NOCHAN(  | DOWN     | NOCHAN(  | NOCHAN(  | NOCHAN(  | NOCHAN(  |
| UP       | NOCHAN(  | NOCHAN(  | NOCHAN(  | UP       | UP       | NOCHAN(  | UP       | NOCHAN(  |
| DOWN     | NOCHAN(  | DOWN     | NOCHAN(  | DOWN     | DOWN     | DOWN     | DOWN     | DOWN     |
| NOCHAN(  | DOWN     | NOCHAN(  | DOWN     | NOCHAN(  | NOCHAN(  | DOWN     | DOWN     | DOWN     |
| DOWN     | NOCHAN(  | DOWN     | NOCHAN(  | DOWN     | DOWN     | DOWN     | DOWN     | DOWN     |
| NOCHAN(  | DOWN     | NOCHAN(  | NOCHAN(  | DOWN     | NOCHAN(  | NOCHAN(  | NOCHAN(  | DOWN     |
| UP       | NOCHAN(  | UP       | UP       | UP       | UP       | UP       | UP       | UP       |
| NOCHAN(  | NOCHAN(  | NOCHAN(  | NOCHAN(  | NOCHAN(  | NOCHAN(  | DOWN     | NOCHAN(  | DOWN     |
| NOCHAN(  | NOCHAN(  | NOCHAN(  | NOCHAN(  | NOCHAN(  | NOCHAN(  | DOWN     | NOCHAN(  | NOCHAN(  |
| NOCHAN(  | DOWN     | NOCHAN(  | NOCHAN(  | NOCHAN(  | NOCHAN(  | NOCHAN(  | NOCHAN(  | NOCHAN(  |
| NOCHAN(  | NOCHAN(  | DOWN     | DOWN     | DOWN     | DOWN     | DOWN     | DOWN     | DOWN     |
| NOCHAN(  | NOCHAN(  | NOCHAN(  | UP       | NOCHAN(  | NOCHAN(  | NOCHAN(  | NOCHAN(  | NOCHAN(  |
| NOCHAN(  | NOCHAN(  | NOCHAN(  | NOCHAN(  | NOCHAN(  | NOCHAN(  | NOCHAN(  | NOCHAN(  | NOCHAN(  |
| NOCHAN(  | DOWN     | NOCHAN(  | NOCHAN(  | DOWN     | NOCHAN(  | NOCHAN(  | NOCHAN(  | NOCHAN(  |
| DOWN     | NOCHAN(  | UP       | NOCHAN(  | DOWN     | NOCHAN(  | NOCHAN(  | UP       | NOCHAN(  |
| NOCHAN(  | UP       | NOCHAN(  | NOCHAN(  | NOCHAN(  | NOCHAN(  | NOCHAN(  | NOCHAN(  | DOWN     |
| UP       | UP       | UP       | NOCHAN(  | NOCHAN(  | NOCHAN(  | NOCHAN(  | UP       | NOCHAN(  |
| NOCHAN(  | DOWN     | NOCHAN(  | NOCHAN(  | NOCHAN(  | NOCHAN(  | NOCHAN(  | NOCHAN(  | NOCHAN(  |
| NOCHAN(  | NOCHAN(  | NOCHAN(  | UP       | NOCHAN(  | NOCHAN(  | NOCHAN(  | DOWN     | NOCHAN(  |
| NOCHAN(  | NOCHAN(  | NOCHAN(  | NOCHAN(  | DOWN     | NOCHAN(  | NOCHAN(  | DOWN     | DOWN     |
| NOCHAN(  | DOWN     | DOWN     | DOWN     | DOWN     | DOWN     | DOWN     | DOWN     | DOWN     |
| NOCHAN(  | UP       | NOCHAN(  | UP       | NOCHAN(  | NOCHAN(  | UP       | UP       | NOCHAN(  |
| UP       | UP       | NOCHAN(  | UP       | UP       | UP       | NOCHAN(  | NOCHAN(  | NOCHAN(  |
| UP       | NOCHAN(  | UP       | NOCHAN(  | NOCHAN(  | NOCHAN(  | UP       | NOCHAN(  | NOCHAN(  |

TCGA-A3- TCGA-A3- TCGA-BP- TCGA-CJ- TCGA-CJ- TCGA-CJ- TCGA-B0- TCGA-B0- TCGA-A3-  
NOCHAN( NOCHAN( DOWN NOCHAN( DOWN NOCHAN( DOWN DOWN NOCHAN(  
NOCHAN( NOCHAN( NOCHAN( DOWN DOWN DOWN DOWN DOWN NOCHAN(  
DOWN DOWN DOWN DOWN DOWN DOWN DOWN DOWN DOWN  
NOCHAN( UP NOCHAN( NOCHAN( UP UP NOCHAN( UP NOCHAN(  
NOCHAN( NOCHAN( NOCHAN( NOCHAN( NOCHAN( NOCHAN( UP NOCHAN( NOCHAN(  
DOWN DOWN DOWN NOCHAN( DOWN NOCHAN( DOWN DOWN DOWN  
NOCHAN( DOWN DOWN DOWN NOCHAN( DOWN NOCHAN( NOCHAN( NOCHAN(  
NOCHAN( NOCHAN( NOCHAN( NOCHAN( NOCHAN( NOCHAN( NOCHAN( NOCHAN( NOCHAN(  
NOCHAN( UP UP NOCHAN( UP UP UP UP UP UP  
NOCHAN( NOCHAN( NOCHAN( NOCHAN( DOWN NOCHAN( DOWN NOCHAN( NOCHAN(  
NOCHAN( NOCHAN( NOCHAN( UP NOCHAN( NOCHAN( NOCHAN( UP NOCHAN(  
NOCHAN( NOCHAN( NOCHAN( NOCHAN( NOCHAN( NOCHAN( DOWN NOCHAN( NOCHAN(  
NOCHAN( NOCHAN( NOCHAN( NOCHAN( NOCHAN( NOCHAN( NOCHAN( NOCHAN( NOCHAN(  
NOCHAN( NOCHAN( NOCHAN( NOCHAN( NOCHAN( DOWN NOCHAN( NOCHAN( NOCHAN(  
NOCHAN( NOCHAN( NOCHAN( NOCHAN( NOCHAN( UP NOCHAN( NOCHAN( NOCHAN(  
NOCHAN( NOCHAN( UP NOCHAN( NOCHAN( NOCHAN( NOCHAN( NOCHAN( NOCHAN(  
NOCHAN( NOCHAN( NOCHAN( NOCHAN( NOCHAN( NOCHAN( NOCHAN( NOCHAN( UP  
UP NOCHAN( NOCHAN( UP NOCHAN( UP NOCHAN( NOCHAN( UP  
DOWN DOWN NOCHAN( NOCHAN( DOWN NOCHAN( DOWN DOWN DOWN  
NOCHAN( DOWN NOCHAN( NOCHAN( DOWN NOCHAN( DOWN NOCHAN( DOWN  
NOCHAN( DOWN NOCHAN( NOCHAN( DOWN NOCHAN( DOWN NOCHAN( NOCHAN(  
NOCHAN( NOCHAN( NOCHAN( NOCHAN( NOCHAN( NOCHAN( NOCHAN( NOCHAN( NOCHAN(  
UP  
NOCHAN( DOWN NOCHAN( NOCHAN( NOCHAN( NOCHAN( DOWN NOCHAN( NOCHAN(  
NOCHAN( NOCHAN( NOCHAN( NOCHAN( NOCHAN( NOCHAN( NOCHAN( NOCHAN( NOCHAN(  
NOCHAN( NOCHAN( NOCHAN( NOCHAN( NOCHAN( NOCHAN( NOCHAN( NOCHAN( NOCHAN(  
DOWN DOWN DOWN NOCHAN( DOWN DOWN DOWN DOWN NOCHAN(  
NOCHAN( NOCHAN( NOCHAN( NOCHAN( NOCHAN( NOCHAN( DOWN NOCHAN( NOCHAN(  
NOCHAN( UP NOCHAN( UP NOCHAN( NOCHAN( NOCHAN( UP NOCHAN(  
DOWN NOCHAN( DOWN NOCHAN( UP NOCHAN( NOCHAN( NOCHAN( DOWN  
NOCHAN( NOCHAN( NOCHAN( DOWN UP NOCHAN( UP NOCHAN( DOWN  
NOCHAN( DOWN NOCHAN( NOCHAN( NOCHAN( NOCHAN( DOWN NOCHAN( NOCHAN(  
UP NOCHAN( NOCHAN( UP NOCHAN( UP NOCHAN( UP UP  
NOCHAN( NOCHAN( NOCHAN( NOCHAN( NOCHAN( NOCHAN( NOCHAN( NOCHAN( DOWN  
NOCHAN( UP UP NOCHAN( NOCHAN( UP NOCHAN( NOCHAN( NOCHAN(  
NOCHAN( NOCHAN( NOCHAN( NOCHAN( DOWN NOCHAN( DOWN NOCHAN( NOCHAN(  
DOWN DOWN DOWN DOWN DOWN DOWN DOWN DOWN DOWN  
UP UP UP UP NOCHAN( UP NOCHAN( NOCHAN( NOCHAN(  
UP UP NOCHAN( UP DOWN NOCHAN( DOWN UP NOCHAN(  
UP UP NOCHAN( UP NOCHAN( UP NOCHAN( UP UP



| TCGA-BP- | TCGA-B0- | TCGA-B0- | TCGA-DV | TCGA-BP- | TCGA-B0- | TCGA-AK- | TCGA-CJ- | TCGA-A3- |
|----------|----------|----------|---------|----------|----------|----------|----------|----------|
| NOCHAN(  | DOWN     | DOWN     | DOWN    | DOWN     | DOWN     | NOCHAN(  | DOWN     | DOWN     |
| DOWN     | DOWN     | DOWN     | DOWN    | DOWN     | NOCHAN(  | NOCHAN(  | DOWN     | DOWN     |
| DOWN     | DOWN     | DOWN     | DOWN    | DOWN     | DOWN     | NOCHAN(  | DOWN     | DOWN     |
| NOCHAN(  | NOCHAN(  | NOCHAN(  | NOCHAN( | NOCHAN(  | NOCHAN(  | NOCHAN(  | UP       | NOCHAN(  |
| NOCHAN(  | NOCHAN(  | DOWN     | NOCHAN( | NOCHAN(  | NOCHAN(  | DOWN     | NOCHAN(  | NOCHAN(  |
| DOWN     | DOWN     | DOWN     | DOWN    | DOWN     | DOWN     | UP       | DOWN     | DOWN     |
| DOWN     | NOCHAN(  | NOCHAN(  | DOWN    | NOCHAN(  | DOWN     | UP       | NOCHAN(  | NOCHAN(  |
| NOCHAN(  | NOCHAN(  | NOCHAN(  | UP      | NOCHAN(  | UP       | NOCHAN(  | DOWN     | NOCHAN(  |
| UP       | UP       | UP       | NOCHAN( | UP       | UP       | DOWN     | NOCHAN(  | NOCHAN(  |
| DOWN     | NOCHAN(  | NOCHAN(  | NOCHAN( | DOWN     | DOWN     | NOCHAN(  | DOWN     | NOCHAN(  |
| NOCHAN(  | NOCHAN(  | NOCHAN(  | NOCHAN( | NOCHAN(  | NOCHAN(  | NOCHAN(  | UP       | NOCHAN(  |
| NOCHAN(  | NOCHAN(  | DOWN     | DOWN    | NOCHAN(  | NOCHAN(  | NOCHAN(  | NOCHAN(  | NOCHAN(  |
| NOCHAN(  | NOCHAN(  | DOWN     | DOWN    | DOWN     | NOCHAN(  | DOWN     | NOCHAN(  | NOCHAN(  |
| UP       | NOCHAN(  | UP       | NOCHAN( | UP       | NOCHAN(  | NOCHAN(  | NOCHAN(  | UP       |
| NOCHAN(  | NOCHAN(  | NOCHAN(  | NOCHAN( | UP       | NOCHAN(  | NOCHAN(  | DOWN     | NOCHAN(  |
| NOCHAN(  | NOCHAN(  | UP       | NOCHAN( | NOCHAN(  | NOCHAN(  | UP       | UP       | NOCHAN(  |
| NOCHAN(  | NOCHAN(  | NOCHAN(  | NOCHAN( | NOCHAN(  | NOCHAN(  | NOCHAN(  | UP       | NOCHAN(  |
| NOCHAN(  | NOCHAN(  | UP       | NOCHAN( | NOCHAN(  | NOCHAN(  | NOCHAN(  | NOCHAN(  | NOCHAN(  |
| DOWN     | DOWN     | DOWN     | NOCHAN( | DOWN     | DOWN     | UP       | DOWN     | NOCHAN(  |
| DOWN     | DOWN     | DOWN     | NOCHAN( | DOWN     | DOWN     | UP       | NOCHAN(  | DOWN     |
| DOWN     | DOWN     | DOWN     | NOCHAN( | DOWN     | DOWN     | UP       | DOWN     | DOWN     |
| NOCHAN(  | NOCHAN(  | NOCHAN(  | DOWN    | NOCHAN(  | NOCHAN(  | DOWN     | NOCHAN(  | NOCHAN(  |
| UP       | UP       | UP       | NOCHAN( | UP       | UP       | DOWN     | UP       | UP       |
| DOWN     | DOWN     | NOCHAN(  | NOCHAN( | DOWN     | DOWN     | UP       | NOCHAN(  | NOCHAN(  |
| NOCHAN(  | DOWN     | DOWN     | NOCHAN( | DOWN     | DOWN     | NOCHAN(  | NOCHAN(  | DOWN     |
| NOCHAN(  | DOWN     | DOWN     | NOCHAN( | NOCHAN(  | NOCHAN(  | NOCHAN(  | NOCHAN(  | NOCHAN(  |
| DOWN     | DOWN     | DOWN     | NOCHAN( | DOWN     | DOWN     | NOCHAN(  | DOWN     | DOWN     |
| NOCHAN(  | DOWN     | NOCHAN(  | DOWN    | DOWN     | NOCHAN(  | UP       | DOWN     | NOCHAN(  |
| NOCHAN(  | NOCHAN(  | NOCHAN(  | UP      | DOWN     | NOCHAN(  | UP       | DOWN     | DOWN     |
| NOCHAN(  | NOCHAN(  | NOCHAN(  | NOCHAN( | NOCHAN(  | NOCHAN(  | NOCHAN(  | NOCHAN(  | NOCHAN(  |
| UP       | NOCHAN(  | NOCHAN(  | DOWN    | UP       | UP       | DOWN     | UP       | NOCHAN(  |
| DOWN     | NOCHAN(  | NOCHAN(  | NOCHAN( | DOWN     | DOWN     | NOCHAN(  | NOCHAN(  | DOWN     |
| NOCHAN(  | NOCHAN(  | NOCHAN(  | NOCHAN( | NOCHAN(  | NOCHAN(  | NOCHAN(  | NOCHAN(  | NOCHAN(  |
| NOCHAN(  | NOCHAN(  | NOCHAN(  | NOCHAN( | UP       | NOCHAN(  | NOCHAN(  | UP       | NOCHAN(  |
| UP       | DOWN     | NOCHAN(  | NOCHAN( | DOWN     | UP       | DOWN     | NOCHAN(  | NOCHAN(  |
| NOCHAN(  | NOCHAN(  | NOCHAN(  | NOCHAN( | DOWN     | DOWN     | UP       | NOCHAN(  | NOCHAN(  |
| DOWN     | DOWN     | DOWN     | NOCHAN( | DOWN     | DOWN     | NOCHAN(  | DOWN     | DOWN     |
| UP       | NOCHAN(  | UP       | NOCHAN( | NOCHAN(  | UP       | NOCHAN(  | NOCHAN(  | UP       |
| DOWN     | NOCHAN(  | UP       | UP      | DOWN     | DOWN     | UP       | DOWN     | NOCHAN(  |
| NOCHAN(  | NOCHAN(  | NOCHAN(  | UP      | NOCHAN(  | NOCHAN(  | NOCHAN(  | NOCHAN(  | NOCHAN(  |

| TCGA-B0- | TCGA-BP- | TCGA-BP- | TCGA-BP- | TCGA-CJ- | TCGA-B4- | TCGA-BP- | TCGA-B2- | TCGA-BP- |
|----------|----------|----------|----------|----------|----------|----------|----------|----------|
| DOWN     | DOWN     | DOWN     | DOWN     | NOCHAN(  | NOCHAN(  | DOWN     | DOWN     | NOCHAN(  |
| DOWN     | NOCHAN(  | NOCHAN(  | NOCHAN(  | NOCHAN(  | NOCHAN(  | NOCHAN(  | DOWN     | NOCHAN(  |
| DOWN     | DOWN     | NOCHAN(  | DOWN     | DOWN     | DOWN     | DOWN     | NOCHAN(  | NOCHAN(  |
| NOCHAN(  | NOCHAN(  | NOCHAN(  | UP       | NOCHAN(  | NOCHAN(  | NOCHAN(  | NOCHAN(  | NOCHAN(  |
| NOCHAN(  | NOCHAN(  | UP       | UP       | NOCHAN(  | NOCHAN(  | NOCHAN(  | UP       | NOCHAN(  |
| DOWN     | DOWN     | NOCHAN(  | DOWN     | DOWN     | NOCHAN(  | NOCHAN(  | NOCHAN(  | NOCHAN(  |
| NOCHAN(  | NOCHAN(  | DOWN     | DOWN     | NOCHAN(  | NOCHAN(  | NOCHAN(  | NOCHAN(  | DOWN     |
| NOCHAN(  | NOCHAN(  | NOCHAN(  | NOCHAN(  | NOCHAN(  | NOCHAN(  | NOCHAN(  | UP       | NOCHAN(  |
| UP       | NOCHAN(  | NOCHAN(  | NOCHAN(  | UP       | NOCHAN(  | NOCHAN(  | DOWN     | NOCHAN(  |
| NOCHAN(  | DOWN     | DOWN     | DOWN     | DOWN     | NOCHAN(  | DOWN     | UP       | NOCHAN(  |
| NOCHAN(  | NOCHAN(  | UP       | UP       | NOCHAN(  | NOCHAN(  | NOCHAN(  | UP       | UP       |
| NOCHAN(  | NOCHAN(  | NOCHAN(  | DOWN     | NOCHAN(  | NOCHAN(  | NOCHAN(  | DOWN     | NOCHAN(  |
| NOCHAN(  | DOWN     | NOCHAN(  | NOCHAN(  | NOCHAN(  | DOWN     | NOCHAN(  | NOCHAN(  | NOCHAN(  |
| NOCHAN(  | NOCHAN(  | NOCHAN(  | NOCHAN(  | NOCHAN(  | NOCHAN(  | NOCHAN(  | DOWN     | NOCHAN(  |
| NOCHAN(  | NOCHAN(  | UP       | NOCHAN(  | NOCHAN(  | NOCHAN(  | NOCHAN(  | NOCHAN(  | DOWN     |
| UP       | NOCHAN(  | NOCHAN(  | NOCHAN(  | NOCHAN(  | NOCHAN(  | NOCHAN(  | DOWN     | NOCHAN(  |
| UP       | NOCHAN(  | NOCHAN(  | UP       | NOCHAN(  | NOCHAN(  | NOCHAN(  | UP       | NOCHAN(  |
| NOCHAN(  | UP       | NOCHAN(  | UP       | NOCHAN(  | UP       | UP       | UP       | NOCHAN(  |
| DOWN     | DOWN     | DOWN     | DOWN     | DOWN     | NOCHAN(  | DOWN     | DOWN     | NOCHAN(  |
| NOCHAN(  | NOCHAN(  | DOWN     | NOCHAN(  | DOWN     | DOWN     | DOWN     | NOCHAN(  | DOWN     |
| NOCHAN(  | DOWN     | DOWN     | DOWN     | DOWN     | NOCHAN(  | DOWN     | NOCHAN(  | DOWN     |
| NOCHAN(  | DOWN     | NOCHAN(  | DOWN     | NOCHAN(  | NOCHAN(  | DOWN     | DOWN     | NOCHAN(  |
| UP       | UP       | UP       | UP       | UP       | UP       | UP       | NOCHAN(  | UP       |
| NOCHAN(  | NOCHAN(  | NOCHAN(  | NOCHAN(  | DOWN     | NOCHAN(  | NOCHAN(  | NOCHAN(  | NOCHAN(  |
| NOCHAN(  | NOCHAN(  | NOCHAN(  | NOCHAN(  | NOCHAN(  | DOWN     | NOCHAN(  | UP       | NOCHAN(  |
| NOCHAN(  | NOCHAN(  | NOCHAN(  | NOCHAN(  | NOCHAN(  | DOWN     | NOCHAN(  | NOCHAN(  | NOCHAN(  |
| DOWN     | NOCHAN(  | DOWN     | NOCHAN(  | NOCHAN(  | DOWN     | NOCHAN(  | NOCHAN(  | DOWN     |
| NOCHAN(  | NOCHAN(  | NOCHAN(  | NOCHAN(  | NOCHAN(  | DOWN     | NOCHAN(  | DOWN     | NOCHAN(  |
| NOCHAN(  | NOCHAN(  | NOCHAN(  | NOCHAN(  | NOCHAN(  | DOWN     | NOCHAN(  | DOWN     | NOCHAN(  |
| NOCHAN(  | NOCHAN(  | NOCHAN(  | NOCHAN(  | NOCHAN(  | NOCHAN(  | NOCHAN(  | NOCHAN(  | NOCHAN(  |
| UP       | NOCHAN(  | UP       | UP       | NOCHAN(  | NOCHAN(  | UP       | UP       | NOCHAN(  |
| NOCHAN(  | NOCHAN(  | NOCHAN(  | NOCHAN(  | NOCHAN(  | NOCHAN(  | NOCHAN(  | DOWN     | NOCHAN(  |
| NOCHAN(  | NOCHAN(  | NOCHAN(  | NOCHAN(  | UP       | NOCHAN(  | UP       | DOWN     | NOCHAN(  |
| NOCHAN(  | NOCHAN(  | NOCHAN(  | DOWN     | DOWN     | NOCHAN(  | NOCHAN(  | NOCHAN(  | NOCHAN(  |
| DOWN     | DOWN     | DOWN     | DOWN     | DOWN     | DOWN     | DOWN     | NOCHAN(  | DOWN     |
| UP       | NOCHAN(  | UP       | NOCHAN(  | UP       | UP       | NOCHAN(  | NOCHAN(  | UP       |
| UP       | UP       | NOCHAN(  | UP       | NOCHAN(  | UP       | NOCHAN(  | NOCHAN(  | NOCHAN(  |
| UP       | UP       | NOCHAN(  | UP       | NOCHAN(  | NOCHAN(  | UP       | UP       | NOCHAN(  |

| TCGA-B0-TCGA-B0-TCGA-BP-TCGA-CJ-TCGA-B0-TCGA-BP-TCGA-BP-TCGA-BP-TCGA-B4- |         |         |         |         |         |         |         |         |         |
|--------------------------------------------------------------------------|---------|---------|---------|---------|---------|---------|---------|---------|---------|
| NOCHAN(                                                                  | NOCHAN( | DOWN    | DOWN    | DOWN    | NOCHAN( | DOWN    | DOWN    | DOWN    | DOWN    |
| DOWN                                                                     | DOWN    | NOCHAN( | NOCHAN( | DOWN    | DOWN    | DOWN    | DOWN    | DOWN    | UP      |
| DOWN                                                                     | DOWN    | DOWN    | NOCHAN( | DOWN    | DOWN    | DOWN    | DOWN    | DOWN    | UP      |
| NOCHAN(                                                                  | NOCHAN( | NOCHAN( | NOCHAN( | NOCHAN( | NOCHAN( | NOCHAN( | NOCHAN( | NOCHAN( | DOWN    |
| NOCHAN(                                                                  | UP      | NOCHAN( | NOCHAN( | NOCHAN( | NOCHAN( | NOCHAN( | NOCHAN( | NOCHAN( | DOWN    |
| DOWN                                                                     | DOWN    | NOCHAN( | NOCHAN( | DOWN    | NOCHAN( | DOWN    | NOCHAN( | NOCHAN( | UP      |
| NOCHAN(                                                                  | DOWN    | DOWN    | DOWN    | NOCHAN( | NOCHAN( | DOWN    | NOCHAN( | NOCHAN( | NOCHAN( |
| NOCHAN(                                                                  | UP      | NOCHAN( | NOCHAN( | NOCHAN( | NOCHAN( | NOCHAN( | NOCHAN( | NOCHAN( | DOWN    |
| UP                                                                       | UP      | NOCHAN( | NOCHAN( | NOCHAN( | UP      | UP      | NOCHAN( | NOCHAN( | DOWN    |
| NOCHAN(                                                                  | NOCHAN( | DOWN    | DOWN    | DOWN    | NOCHAN( | DOWN    | NOCHAN( | NOCHAN( | UP      |
| UP                                                                       | NOCHAN( | NOCHAN( | NOCHAN( | NOCHAN( | NOCHAN( | NOCHAN( | UP      | NOCHAN( | NOCHAN( |
| NOCHAN(                                                                  | DOWN    | NOCHAN( | NOCHAN( | DOWN    | NOCHAN( | UP      | NOCHAN( | NOCHAN( | DOWN    |
| NOCHAN(                                                                  | UP      | NOCHAN( | NOCHAN( | NOCHAN( | NOCHAN( | DOWN    | NOCHAN( | NOCHAN( | UP      |
| NOCHAN(                                                                  | NOCHAN( | NOCHAN( | NOCHAN( | UP      | NOCHAN( | NOCHAN( | NOCHAN( | NOCHAN( | DOWN    |
| NOCHAN(                                                                  | NOCHAN( | DOWN    | NOCHAN( | NOCHAN( | DOWN    | NOCHAN( | NOCHAN( | NOCHAN( | DOWN    |
| UP                                                                       | NOCHAN( | UP      | NOCHAN( | UP      | NOCHAN( | UP      | UP      | DOWN    |         |
| NOCHAN(                                                                  | UP      | NOCHAN( | NOCHAN( | NOCHAN( | NOCHAN( | NOCHAN( | UP      | DOWN    |         |
| UP                                                                       | UP      | NOCHAN( | NOCHAN( | NOCHAN( | NOCHAN( | NOCHAN( | UP      | NOCHAN( |         |
| DOWN                                                                     | DOWN    | NOCHAN( | DOWN    | DOWN    | DOWN    | DOWN    | NOCHAN( | UP      |         |
| NOCHAN(                                                                  | DOWN    | DOWN    | DOWN    | NOCHAN( | DOWN    | NOCHAN( | NOCHAN( | NOCHAN( |         |
| NOCHAN(                                                                  | NOCHAN( | NOCHAN( | DOWN    | DOWN    | NOCHAN( | DOWN    | NOCHAN( | UP      |         |
| NOCHAN(                                                                  | NOCHAN( | NOCHAN( | DOWN    | NOCHAN( | NOCHAN( | DOWN    | NOCHAN( | NOCHAN( |         |
| UP                                                                       | UP      | UP      | UP      | UP      | UP      | UP      | UP      | NOCHAN( |         |
| NOCHAN(                                                                  | NOCHAN( | NOCHAN( | NOCHAN( | NOCHAN( | NOCHAN( | NOCHAN( | NOCHAN( | NOCHAN( |         |
| NOCHAN(                                                                  | NOCHAN( | NOCHAN( | NOCHAN( | NOCHAN( | NOCHAN( | DOWN    | NOCHAN( | UP      |         |
| NOCHAN(                                                                  | NOCHAN( | NOCHAN( | DOWN    | DOWN    | DOWN    | NOCHAN( | NOCHAN( | DOWN    |         |
| DOWN                                                                     | DOWN    | DOWN    | DOWN    | DOWN    | DOWN    | DOWN    | DOWN    | DOWN    |         |
| NOCHAN(                                                                  | NOCHAN( | NOCHAN( | NOCHAN( | NOCHAN( | NOCHAN( | NOCHAN( | NOCHAN( | NOCHAN( |         |
| NOCHAN(                                                                  | UP      | NOCHAN( | NOCHAN( | DOWN    | NOCHAN( | NOCHAN( | UP      | DOWN    |         |
| DOWN                                                                     | DOWN    | NOCHAN( | NOCHAN( | UP      | DOWN    | NOCHAN( | NOCHAN( | UP      |         |
| NOCHAN(                                                                  | NOCHAN( | NOCHAN( | NOCHAN( | UP      | NOCHAN( | UP      | NOCHAN( | DOWN    |         |
| NOCHAN(                                                                  | NOCHAN( | NOCHAN( | NOCHAN( | DOWN    | NOCHAN( | NOCHAN( | NOCHAN( | UP      |         |
| NOCHAN(                                                                  | NOCHAN( | NOCHAN( | UP      | NOCHAN( | NOCHAN( | UP      | UP      | UP      |         |
| NOCHAN(                                                                  | NOCHAN( | NOCHAN( | NOCHAN( | UP      | NOCHAN( | NOCHAN( | NOCHAN( | DOWN    |         |
| NOCHAN(                                                                  | UP      | NOCHAN( | NOCHAN( | UP      | UP      | NOCHAN( | NOCHAN( | DOWN    |         |
| NOCHAN(                                                                  | NOCHAN( | NOCHAN( | NOCHAN( | NOCHAN( | NOCHAN( | NOCHAN( | NOCHAN( | DOWN    |         |
| DOWN                                                                     | DOWN    | NOCHAN( | DOWN    | DOWN    | DOWN    | DOWN    | NOCHAN( | DOWN    |         |
| UP                                                                       | NOCHAN( | NOCHAN( | UP      | NOCHAN( | UP      | UP      | UP      | UP      |         |
| UP                                                                       | NOCHAN( | NOCHAN( | NOCHAN( | NOCHAN( | UP      | DOWN    | UP      | NOCHAN( |         |
| UP                                                                       | UP      | NOCHAN( | NOCHAN( | UP      | NOCHAN( | DOWN    | UP      | DOWN    |         |

| TCGA-B0- | TCGA-B8- | TCGA-CW | TCGA-MM | TCGA-CJ- | TCGA-CJ- | TCGA-BP- | TCGA-BP- | TCGA-B0- |
|----------|----------|---------|---------|----------|----------|----------|----------|----------|
| DOWN     | DOWN     | DOWN    | NOCHAN( | DOWN     | DOWN     | DOWN     | DOWN     | NOCHAN(  |
| DOWN     | NOCHAN(  | NOCHAN( | DOWN    | NOCHAN(  | NOCHAN(  | DOWN     | NOCHAN(  | DOWN     |
| DOWN     | NOCHAN(  | DOWN    | DOWN    | NOCHAN(  | DOWN     | DOWN     | NOCHAN(  | DOWN     |
| UP       | NOCHAN(  | NOCHAN( | UP      | NOCHAN(  | UP       | NOCHAN(  | UP       | UP       |
| UP       | NOCHAN(  | NOCHAN( | NOCHAN( | UP       | NOCHAN(  | DOWN     | NOCHAN(  | NOCHAN(  |
| NOCHAN(  | NOCHAN(  | NOCHAN( | DOWN    | DOWN     | UP       | DOWN     | DOWN     | DOWN     |
| NOCHAN(  | DOWN     | NOCHAN( | DOWN    | NOCHAN(  | NOCHAN(  | NOCHAN(  | NOCHAN(  | DOWN     |
| NOCHAN(  | NOCHAN(  | NOCHAN( | NOCHAN( | UP       | NOCHAN(  | NOCHAN(  | NOCHAN(  | NOCHAN(  |
| UP       | NOCHAN(  | NOCHAN( | UP      | UP       | NOCHAN(  | NOCHAN(  | NOCHAN(  | UP       |
| DOWN     | NOCHAN(  | NOCHAN( | DOWN    | DOWN     | DOWN     | DOWN     | NOCHAN(  | DOWN     |
| UP       | NOCHAN(  | NOCHAN( | NOCHAN( | NOCHAN(  | UP       | NOCHAN(  | NOCHAN(  | NOCHAN(  |
| NOCHAN(  | NOCHAN(  | NOCHAN( | NOCHAN( | NOCHAN(  | NOCHAN(  | NOCHAN(  | DOWN     | NOCHAN(  |
| NOCHAN(  | NOCHAN(  | NOCHAN( | NOCHAN( | NOCHAN(  | DOWN     | NOCHAN(  | NOCHAN(  | NOCHAN(  |
| NOCHAN(  | NOCHAN(  | NOCHAN( | UP      | NOCHAN(  | NOCHAN(  | NOCHAN(  | NOCHAN(  | UP       |
| NOCHAN(  | NOCHAN(  | UP      | NOCHAN( | NOCHAN(  | DOWN     | NOCHAN(  | NOCHAN(  | NOCHAN(  |
| NOCHAN(  | NOCHAN(  | NOCHAN( | NOCHAN( | NOCHAN(  | NOCHAN(  | NOCHAN(  | NOCHAN(  | NOCHAN(  |
| UP       | NOCHAN(  | NOCHAN( | NOCHAN( | NOCHAN(  | UP       | DOWN     | NOCHAN(  | NOCHAN(  |
| NOCHAN(  | NOCHAN(  | UP      | NOCHAN( | UP       | UP       | NOCHAN(  | UP       | NOCHAN(  |
| DOWN     | NOCHAN(  | DOWN    | DOWN    | DOWN     | DOWN     | DOWN     | DOWN     | DOWN     |
| NOCHAN(  | DOWN     | NOCHAN( | DOWN    | DOWN     | DOWN     | DOWN     | DOWN     | DOWN     |
| NOCHAN(  | DOWN     | NOCHAN( | DOWN    | DOWN     | DOWN     | DOWN     | NOCHAN(  | DOWN     |
| NOCHAN(  | NOCHAN(  | DOWN    | NOCHAN( | NOCHAN(  | DOWN     | NOCHAN(  | DOWN     | NOCHAN(  |
| UP       | NOCHAN(  | UP      | UP      | UP       | UP       | UP       | NOCHAN(  | UP       |
| NOCHAN(  | DOWN     | NOCHAN( | DOWN    | DOWN     | DOWN     | DOWN     | NOCHAN(  | DOWN     |
| NOCHAN(  | NOCHAN(  | NOCHAN( | DOWN    | NOCHAN(  | UP       | DOWN     | NOCHAN(  | NOCHAN(  |
| NOCHAN(  | NOCHAN(  | NOCHAN( | NOCHAN( | NOCHAN(  | NOCHAN(  | DOWN     | NOCHAN(  | NOCHAN(  |
| DOWN     | NOCHAN(  | NOCHAN( | DOWN    | DOWN     | NOCHAN(  | DOWN     | DOWN     | DOWN     |
| NOCHAN(  | NOCHAN(  | NOCHAN( | DOWN    | NOCHAN(  | NOCHAN(  | DOWN     | NOCHAN(  | NOCHAN(  |
| NOCHAN(  | NOCHAN(  | NOCHAN( | NOCHAN( | NOCHAN(  | UP       | NOCHAN(  | UP       | NOCHAN(  |
| NOCHAN(  | DOWN     | NOCHAN( | NOCHAN( | NOCHAN(  | DOWN     | NOCHAN(  | DOWN     | NOCHAN(  |
| NOCHAN(  | NOCHAN(  | NOCHAN( | UP      | UP       | UP       | UP       | DOWN     | UP       |
| NOCHAN(  | NOCHAN(  | NOCHAN( | DOWN    | NOCHAN(  | DOWN     | DOWN     | NOCHAN(  | DOWN     |
| UP       | NOCHAN(  | UP      | NOCHAN( | UP       | UP       | NOCHAN(  | UP       | NOCHAN(  |
| NOCHAN(  | DOWN     | NOCHAN( | NOCHAN( | NOCHAN(  | NOCHAN(  | NOCHAN(  | DOWN     | NOCHAN(  |
| NOCHAN(  | UP       | UP      | NOCHAN( | NOCHAN(  | DOWN     | NOCHAN(  | NOCHAN(  | NOCHAN(  |
| NOCHAN(  | NOCHAN(  | NOCHAN( | DOWN    | NOCHAN(  | NOCHAN(  | DOWN     | NOCHAN(  | NOCHAN(  |
| DOWN     | DOWN     | DOWN    | DOWN    | DOWN     | NOCHAN(  | DOWN     | NOCHAN(  | DOWN     |
| UP       | NOCHAN(  | NOCHAN( | NOCHAN( | UP       | NOCHAN(  | NOCHAN(  | UP       | UP       |
| NOCHAN(  | UP       | UP      | DOWN    | NOCHAN(  | DOWN     | NOCHAN(  | UP       | NOCHAN(  |
| UP       | NOCHAN(  | NOCHAN( | NOCHAN( | NOCHAN(  | UP       | NOCHAN(  | UP       | NOCHAN(  |

| TCGA-CJ- | TCGA-BP- | TCGA-B0- | TCGA-CW | TCGA-BP- | TCGA-CW | TCGA-A3- | TCGA-B0- | TCGA-B0- |
|----------|----------|----------|---------|----------|---------|----------|----------|----------|
| NOCHAN(  | DOWN     | NOCHAN(  | NOCHAN( | DOWN     | NOCHAN( | NOCHAN(  | DOWN     | DOWN     |
| DOWN     | DOWN     | NOCHAN(  | NOCHAN( | DOWN     | NOCHAN( | DOWN     | NOCHAN(  | UP       |
| DOWN     | DOWN     | DOWN     | NOCHAN( | DOWN     | DOWN    | DOWN     | DOWN     | UP       |
| NOCHAN(  | NOCHAN(  | NOCHAN(  | NOCHAN( | UP       | NOCHAN( | NOCHAN(  | NOCHAN(  | UP       |
| DOWN     | NOCHAN(  | NOCHAN(  | NOCHAN( | NOCHAN(  | NOCHAN( | UP       | NOCHAN(  | UP       |
| NOCHAN(  | DOWN     | NOCHAN(  | DOWN    | DOWN     | DOWN    | DOWN     | NOCHAN(  | NOCHAN(  |
| NOCHAN(  | NOCHAN(  | NOCHAN(  | NOCHAN( | DOWN     | DOWN    | NOCHAN(  | NOCHAN(  | DOWN     |
| NOCHAN(  | NOCHAN(  | NOCHAN(  | NOCHAN( | NOCHAN(  | NOCHAN( | NOCHAN(  | UP       | NOCHAN(  |
| UP       | NOCHAN(  | UP       | UP      | UP       | UP      | NOCHAN(  | UP       | UP       |
| NOCHAN(  | NOCHAN(  | NOCHAN(  | NOCHAN( | DOWN     | DOWN    | NOCHAN(  | NOCHAN(  | DOWN     |
| NOCHAN(  | UP       | NOCHAN(  | NOCHAN( | UP       | NOCHAN( | UP       | NOCHAN(  | NOCHAN(  |
| UP       | DOWN     | NOCHAN(  | NOCHAN( | NOCHAN(  | NOCHAN( | NOCHAN(  | NOCHAN(  | NOCHAN(  |
| NOCHAN(  | NOCHAN(  | NOCHAN(  | NOCHAN( | NOCHAN(  | DOWN    | NOCHAN(  | NOCHAN(  | NOCHAN(  |
| UP       | UP       | NOCHAN(  | NOCHAN( | NOCHAN(  | NOCHAN( | NOCHAN(  | UP       | NOCHAN(  |
| DOWN     | NOCHAN(  | NOCHAN(  | NOCHAN( | NOCHAN(  | NOCHAN( | NOCHAN(  | NOCHAN(  | NOCHAN(  |
| UP       | NOCHAN(  | NOCHAN(  | NOCHAN( | NOCHAN(  | NOCHAN( | NOCHAN(  | NOCHAN(  | NOCHAN(  |
| NOCHAN(  | NOCHAN(  | NOCHAN(  | NOCHAN( | NOCHAN(  | NOCHAN( | UP       | DOWN     | NOCHAN(  |
| NOCHAN(  | NOCHAN(  | NOCHAN(  | NOCHAN( | NOCHAN(  | NOCHAN( | NOCHAN(  | NOCHAN(  | NOCHAN(  |
| NOCHAN(  | DOWN     | NOCHAN(  | DOWN    | DOWN     | DOWN    | DOWN     | DOWN     | DOWN     |
| DOWN     | NOCHAN(  | DOWN     | DOWN    | DOWN     | NOCHAN( | DOWN     | DOWN     | DOWN     |
| NOCHAN(  | DOWN     | NOCHAN(  | DOWN    | DOWN     | DOWN    | NOCHAN(  | DOWN     | DOWN     |
| NOCHAN(  | NOCHAN(  | NOCHAN(  | NOCHAN( | NOCHAN(  | NOCHAN( | NOCHAN(  | NOCHAN(  | DOWN     |
| NOCHAN(  | UP       | UP       | UP      | UP       | UP      | UP       | UP       | UP       |
| NOCHAN(  | NOCHAN(  | DOWN     | NOCHAN( | DOWN     | NOCHAN( | NOCHAN(  | NOCHAN(  | DOWN     |
| NOCHAN(  | NOCHAN(  | NOCHAN(  | NOCHAN( | DOWN     | NOCHAN( | NOCHAN(  | NOCHAN(  | NOCHAN(  |
| DOWN     | NOCHAN(  | NOCHAN(  | NOCHAN( | NOCHAN(  | DOWN    | NOCHAN(  | NOCHAN(  | NOCHAN(  |
| DOWN     | DOWN     | DOWN     | NOCHAN( | DOWN     | NOCHAN( | NOCHAN(  | DOWN     | DOWN     |
| NOCHAN(  | NOCHAN(  | NOCHAN(  | NOCHAN( | NOCHAN(  | NOCHAN( | NOCHAN(  | NOCHAN(  | DOWN     |
| NOCHAN(  | NOCHAN(  | NOCHAN(  | NOCHAN( | NOCHAN(  | NOCHAN( | UP       | NOCHAN(  | UP       |
| NOCHAN(  | NOCHAN(  | NOCHAN(  | DOWN    | NOCHAN(  | NOCHAN( | DOWN     | NOCHAN(  | NOCHAN(  |
| NOCHAN(  | NOCHAN(  | NOCHAN(  | NOCHAN( | NOCHAN(  | NOCHAN( | DOWN     | UP       | UP       |
| NOCHAN(  | NOCHAN(  | NOCHAN(  | NOCHAN( | DOWN     | NOCHAN( | NOCHAN(  | NOCHAN(  | NOCHAN(  |
| UP       | UP       | UP       | NOCHAN( | NOCHAN(  | NOCHAN( | NOCHAN(  | UP       | UP       |
| NOCHAN(  | NOCHAN(  | NOCHAN(  | NOCHAN( | NOCHAN(  | NOCHAN( | DOWN     | NOCHAN(  | NOCHAN(  |
| UP       | DOWN     | UP       | NOCHAN( | UP       | NOCHAN( | NOCHAN(  | NOCHAN(  | NOCHAN(  |
| NOCHAN(  | NOCHAN(  | NOCHAN(  | NOCHAN( | NOCHAN(  | NOCHAN( | NOCHAN(  | NOCHAN(  | DOWN     |
| DOWN     | NOCHAN(  | DOWN     | NOCHAN( | DOWN     | DOWN    | DOWN     | NOCHAN(  | DOWN     |
| UP       | NOCHAN(  | UP       | UP      | UP       | NOCHAN( | NOCHAN(  | UP       | UP       |
| NOCHAN(  | UP       | UP       | UP      | NOCHAN(  | UP      | UP       | NOCHAN(  | DOWN     |
| NOCHAN(  | UP       | NOCHAN(  | UP      | NOCHAN(  | UP      | UP       | NOCHAN(  | UP       |

TCGA-BP- TCGA-CJ- TCGA-AK- TCGA-A3- TCGA-G6- TCGA-B0- TCGA-BP- TCGA-B0- TCGA-CW  
NOCHAN( NOCHAN( NOCHAN( NOCHAN( DOWN DOWN DOWN NOCHAN( NOCHAN(  
NOCHAN( DOWN NOCHAN( DOWN DOWN DOWN NOCHAN( DOWN UP  
DOWN DOWN DOWN DOWN DOWN DOWN NOCHAN( DOWN NOCHAN(  
NOCHAN( NOCHAN( NOCHAN( UP UP NOCHAN( NOCHAN( NOCHAN( NOCHAN(  
NOCHAN( NOCHAN( NOCHAN( NOCHAN( NOCHAN( NOCHAN( NOCHAN( NOCHAN( NOCHAN(  
DOWN DOWN NOCHAN( DOWN DOWN DOWN NOCHAN( DOWN NOCHAN(  
NOCHAN( NOCHAN( NOCHAN( NOCHAN( DOWN DOWN NOCHAN( DOWN DOWN  
NOCHAN( NOCHAN( NOCHAN( UP NOCHAN( NOCHAN( NOCHAN( UP NOCHAN(  
NOCHAN( NOCHAN( NOCHAN( UP UP UP NOCHAN( UP NOCHAN(  
NOCHAN( DOWN NOCHAN( NOCHAN( DOWN DOWN DOWN DOWN NOCHAN(  
NOCHAN( NOCHAN( UP NOCHAN( NOCHAN( NOCHAN( NOCHAN( UP NOCHAN(  
NOCHAN( NOCHAN( UP NOCHAN( NOCHAN( NOCHAN( NOCHAN( NOCHAN( DOWN NOCHAN(  
NOCHAN( NOCHAN( NOCHAN( NOCHAN( NOCHAN( NOCHAN( NOCHAN( NOCHAN( NOCHAN(  
NOCHAN( NOCHAN( UP NOCHAN( UP UP NOCHAN( UP NOCHAN(  
NOCHAN( DOWN NOCHAN( NOCHAN( DOWN NOCHAN( NOCHAN( NOCHAN( UP  
NOCHAN( NOCHAN( UP NOCHAN( UP UP NOCHAN( NOCHAN( NOCHAN( NOCHAN(  
NOCHAN( NOCHAN( NOCHAN( NOCHAN( NOCHAN( NOCHAN( NOCHAN( NOCHAN( NOCHAN(  
NOCHAN( NOCHAN( NOCHAN( NOCHAN( NOCHAN( NOCHAN( NOCHAN( NOCHAN( NOCHAN(  
DOWN DOWN NOCHAN( DOWN DOWN DOWN DOWN DOWN DOWN NOCHAN(  
NOCHAN( UP UP NOCHAN( NOCHAN( NOCHAN( NOCHAN( NOCHAN( NOCHAN(  
UP NOCHAN( NOCHAN( UP NOCHAN( NOCHAN( UP DOWN NOCHAN(  
UP UP NOCHAN( UP NOCHAN( NOCHAN( NOCHAN( NOCHAN( NOCHAN(

TCGA-B4- TCGA-BP- TCGA-BP- TCGA-CJ- TCGA-DV TCGA-BP- TCGA-BP- TCGA-BP- TCGA-CJ-  
NOCHAN( NOCHAN( NOCHAN( DOWN DOWN NOCHAN( NOCHAN( NOCHAN( NOCHAN(  
NOCHAN( NOCHAN( DOWN DOWN NOCHAN( NOCHAN( DOWN NOCHAN( DOWN  
DOWN DOWN DOWN DOWN DOWN DOWN DOWN DOWN DOWN  
NOCHAN( NOCHAN( NOCHAN( UP NOCHAN( NOCHAN( UP NOCHAN( UP  
NOCHAN( NOCHAN( NOCHAN( DOWN NOCHAN( NOCHAN( NOCHAN( NOCHAN( NOCHAN(  
DOWN NOCHAN( DOWN DOWN NOCHAN( DOWN DOWN DOWN DOWN  
DOWN NOCHAN( NOCHAN( DOWN DOWN DOWN NOCHAN( DOWN DOWN  
NOCHAN( UP NOCHAN( NOCHAN( NOCHAN( NOCHAN( NOCHAN( NOCHAN( UP NOCHAN(  
UP UP NOCHAN( UP UP UP UP NOCHAN( UP  
NOCHAN( NOCHAN( NOCHAN( DOWN DOWN NOCHAN( DOWN DOWN DOWN  
NOCHAN( UP NOCHAN( NOCHAN( NOCHAN( NOCHAN( NOCHAN( NOCHAN( NOCHAN(  
NOCHAN( NOCHAN( NOCHAN( NOCHAN( NOCHAN( NOCHAN( NOCHAN( NOCHAN(  
NOCHAN( NOCHAN( NOCHAN( DOWN DOWN NOCHAN( NOCHAN( NOCHAN( NOCHAN(  
NOCHAN( NOCHAN( NOCHAN( UP NOCHAN( UP UP NOCHAN( NOCHAN(  
NOCHAN( NOCHAN( DOWN NOCHAN( UP UP NOCHAN( NOCHAN( NOCHAN(  
NOCHAN( NOCHAN( NOCHAN( UP NOCHAN( NOCHAN( NOCHAN( NOCHAN( NOCHAN(  
NOCHAN( UP UP DOWN NOCHAN( NOCHAN( UP NOCHAN( NOCHAN(  
UP UP NOCHAN( NOCHAN( NOCHAN( UP UP NOCHAN( NOCHAN(  
NOCHAN( NOCHAN( NOCHAN( DOWN DOWN NOCHAN( DOWN DOWN DOWN  
NOCHAN( NOCHAN( NOCHAN( DOWN DOWN NOCHAN( DOWN DOWN DOWN  
DOWN NOCHAN( DOWN DOWN DOWN DOWN DOWN DOWN DOWN  
NOCHAN( DOWN NOCHAN( DOWN DOWN UP NOCHAN( NOCHAN( NOCHAN(  
NOCHAN( UP NOCHAN( NOCHAN( NOCHAN( NOCHAN( NOCHAN( NOCHAN( NOCHAN(  
NOCHAN( DOWN NOCHAN( UP NOCHAN( NOCHAN( NOCHAN( NOCHAN( NOCHAN(  
NOCHAN( NOCHAN( NOCHAN( DOWN DOWN NOCHAN( DOWN DOWN DOWN  
UP UP UP NOCHAN( NOCHAN( UP NOCHAN( NOCHAN( NOCHAN(  
DOWN NOCHAN( NOCHAN( NOCHAN( NOCHAN( NOCHAN( DOWN NOCHAN( NOCHAN(  
UP NOCHAN( NOCHAN( UP UP NOCHAN( NOCHAN( NOCHAN( NOCHAN(  
NOCHAN( NOCHAN( NOCHAN( DOWN DOWN NOCHAN( NOCHAN( NOCHAN( NOCHAN(  
DOWN DOWN DOWN DOWN DOWN DOWN DOWN DOWN DOWN  
UP NOCHAN( UP NOCHAN( UP NOCHAN( NOCHAN( UP UP  
UP NOCHAN( UP NOCHAN( DOWN UP NOCHAN( UP NOCHAN(  
NOCHAN( UP UP NOCHAN( NOCHAN( UP UP NOCHAN( NOCHAN(

| TCGA-CZ- | TCGA-B0- | TCGA-B8- | TCGA-BP- | TCGA-B2- | TCGA-AK- | TCGA-B4- | TCGA-BP- | TCGA-BP- |
|----------|----------|----------|----------|----------|----------|----------|----------|----------|
| DOWN     | DOWN     | DOWN     | NOCHAN(  | DOWN     | DOWN     | DOWN     | DOWN     | DOWN     |
| DOWN     | NOCHAN(  | NOCHAN(  | DOWN     | NOCHAN(  | DOWN     | NOCHAN(  | DOWN     | DOWN     |
| DOWN     | DOWN     | DOWN     | DOWN     | DOWN     | DOWN     | DOWN     | DOWN     | DOWN     |
| NOCHAN(  | NOCHAN(  | UP       | NOCHAN(  | NOCHAN(  | NOCHAN(  | NOCHAN(  | UP       | NOCHAN(  |
| NOCHAN(  | NOCHAN(  | NOCHAN(  | NOCHAN(  | NOCHAN(  | NOCHAN(  | NOCHAN(  | NOCHAN(  | NOCHAN(  |
| DOWN     | NOCHAN(  | DOWN     | DOWN     | DOWN     | DOWN     | NOCHAN(  | DOWN     | NOCHAN(  |
| DOWN     | NOCHAN(  | DOWN     | NOCHAN(  | DOWN     | DOWN     | NOCHAN(  | DOWN     | NOCHAN(  |
| NOCHAN(  | NOCHAN(  | NOCHAN(  | NOCHAN(  | UP       | NOCHAN(  | UP       | NOCHAN(  | UP       |
| NOCHAN(  | UP       | UP       | NOCHAN(  | NOCHAN(  | UP       | UP       | NOCHAN(  | UP       |
| DOWN     | NOCHAN(  | DOWN     | NOCHAN(  | NOCHAN(  | DOWN     | NOCHAN(  | DOWN     | DOWN     |
| NOCHAN(  | NOCHAN(  | NOCHAN(  | UP       | NOCHAN(  | NOCHAN(  | NOCHAN(  | NOCHAN(  | NOCHAN(  |
| NOCHAN(  | NOCHAN(  | NOCHAN(  | NOCHAN(  | NOCHAN(  | NOCHAN(  | NOCHAN(  | DOWN     | DOWN     |
| NOCHAN(  | NOCHAN(  | NOCHAN(  | NOCHAN(  | NOCHAN(  | NOCHAN(  | NOCHAN(  | NOCHAN(  | NOCHAN(  |
| UP       | NOCHAN(  | NOCHAN(  | NOCHAN(  | NOCHAN(  | NOCHAN(  | NOCHAN(  | NOCHAN(  | NOCHAN(  |
| DOWN     | NOCHAN(  | UP       | NOCHAN(  | NOCHAN(  | DOWN     | NOCHAN(  | NOCHAN(  | UP       |
| UP       | NOCHAN(  | NOCHAN(  | UP       | NOCHAN(  | UP       | NOCHAN(  | NOCHAN(  | NOCHAN(  |
| NOCHAN(  | DOWN     | NOCHAN(  | UP       | NOCHAN(  | NOCHAN(  | NOCHAN(  | NOCHAN(  | NOCHAN(  |
| NOCHAN(  | NOCHAN(  | NOCHAN(  | UP       | NOCHAN(  | NOCHAN(  | NOCHAN(  | UP       | UP       |
| DOWN     | DOWN     | DOWN     | NOCHAN(  | DOWN     | DOWN     | NOCHAN(  | DOWN     | DOWN     |
| DOWN     | DOWN     | NOCHAN(  | NOCHAN(  | DOWN     | DOWN     | DOWN     | NOCHAN(  | DOWN     |
| DOWN     | DOWN     | DOWN     | NOCHAN(  | DOWN     | DOWN     | NOCHAN(  | DOWN     | DOWN     |
| NOCHAN(  | NOCHAN(  | NOCHAN(  | NOCHAN(  | NOCHAN(  | NOCHAN(  | NOCHAN(  | DOWN     | NOCHAN(  |
| UP       | UP       | UP       | UP       | UP       | UP       | UP       | UP       | UP       |
| DOWN     | NOCHAN(  | DOWN     | NOCHAN(  | NOCHAN(  | DOWN     | NOCHAN(  | UP       | NOCHAN(  |
| NOCHAN(  | NOCHAN(  | NOCHAN(  | NOCHAN(  | NOCHAN(  | NOCHAN(  | NOCHAN(  | NOCHAN(  | NOCHAN(  |
| NOCHAN(  | NOCHAN(  | NOCHAN(  | NOCHAN(  | NOCHAN(  | DOWN     | NOCHAN(  | NOCHAN(  | NOCHAN(  |
| DOWN     | DOWN     | DOWN     | DOWN     | NOCHAN(  | DOWN     | DOWN     | DOWN     | NOCHAN(  |
| NOCHAN(  | NOCHAN(  | NOCHAN(  | NOCHAN(  | NOCHAN(  | DOWN     | NOCHAN(  | DOWN     | NOCHAN(  |
| UP       | NOCHAN(  | UP       | NOCHAN(  | NOCHAN(  | NOCHAN(  | NOCHAN(  | UP       | NOCHAN(  |
| DOWN     | UP       | NOCHAN(  | NOCHAN(  | DOWN     | DOWN     | NOCHAN(  | DOWN     | NOCHAN(  |
| NOCHAN(  | NOCHAN(  | NOCHAN(  | NOCHAN(  | NOCHAN(  | UP       | NOCHAN(  | NOCHAN(  | NOCHAN(  |
| DOWN     | NOCHAN(  | NOCHAN(  | NOCHAN(  | DOWN     | DOWN     | NOCHAN(  | NOCHAN(  | NOCHAN(  |
| NOCHAN(  | UP       | NOCHAN(  | NOCHAN(  | NOCHAN(  | NOCHAN(  | UP       | NOCHAN(  | NOCHAN(  |
| NOCHAN(  | NOCHAN(  | NOCHAN(  | NOCHAN(  | NOCHAN(  | UP       | NOCHAN(  | NOCHAN(  | NOCHAN(  |
| NOCHAN(  | DOWN     | NOCHAN(  | NOCHAN(  | NOCHAN(  | DOWN     | UP       | NOCHAN(  | NOCHAN(  |
| NOCHAN(  | NOCHAN(  | NOCHAN(  | NOCHAN(  | NOCHAN(  | DOWN     | NOCHAN(  | DOWN     | NOCHAN(  |
| DOWN     | NOCHAN(  | DOWN     | DOWN     | DOWN     | DOWN     | DOWN     | DOWN     | DOWN     |
| NOCHAN(  | NOCHAN(  | NOCHAN(  | UP       | NOCHAN(  | NOCHAN(  | UP       | DOWN     | NOCHAN(  |
| UP       | NOCHAN(  | NOCHAN(  | UP       | UP       | DOWN     | NOCHAN(  | UP       | UP       |
| NOCHAN(  | NOCHAN(  | UP       | UP       | UP       | NOCHAN(  | NOCHAN(  | UP       | NOCHAN(  |



| TCGA-B0- | TCGA-AS- | TCGA-CJ- | TCGA-CJ- | TCGA-AK- | TCGA-B8- | TCGA-BP- | TCGA-CJ- | TCGA-B0- |
|----------|----------|----------|----------|----------|----------|----------|----------|----------|
| NOCHANC  | DOWN     | NOCHANC  | NOCHANC  | DOWN     | NOCHANC  | NOCHANC  | NOCHANC  | DOWN     |
| DOWN     | NOCHANC  | NOCHANC  | DOWN     | NOCHANC  | DOWN     | DOWN     | NOCHANC  | NOCHANC  |
| DOWN     | DOWN     | DOWN     | DOWN     | DOWN     | DOWN     | DOWN     | NOCHANC  | DOWN     |
| UP       | DOWN     | NOCHANC  | UP       | NOCHANC  | NOCHANC  | NOCHANC  | DOWN     | NOCHANC  |
| NOCHANC  | DOWN     | NOCHANC  | NOCHANC  | DOWN     | NOCHANC  | NOCHANC  | NOCHANC  | NOCHANC  |
| DOWN     | NOCHANC  | NOCHANC  | DOWN     | NOCHANC  | DOWN     | DOWN     | NOCHANC  | DOWN     |
| DOWN     | NOCHANC  | NOCHANC  | NOCHANC  | NOCHANC  | DOWN     | NOCHANC  | UP       | DOWN     |
| NOCHANC  | NOCHANC  | NOCHANC  | NOCHANC  | NOCHANC  | NOCHANC  | NOCHANC  | UP       | NOCHANC  |
| UP       | NOCHANC  | UP       | UP       | NOCHANC  | NOCHANC  | NOCHANC  | UP       | UP       |
| DOWN     | DOWN     | NOCHANC  | DOWN     | NOCHANC  | DOWN     | NOCHANC  | NOCHANC  | DOWN     |
| UP       | NOCHANC  | NOCHANC  | NOCHANC  | NOCHANC  | NOCHANC  | UP       | NOCHANC  | NOCHANC  |
| NOCHANC  | UP       | NOCHANC  | NOCHANC  | NOCHANC  | DOWN     | DOWN     | NOCHANC  | DOWN     |
| NOCHANC  | NOCHANC  | NOCHANC  | NOCHANC  | NOCHANC  | NOCHANC  | NOCHANC  | NOCHANC  | DOWN     |
| UP       | NOCHANC  | NOCHANC  | NOCHANC  | NOCHANC  | NOCHANC  | NOCHANC  | UP       | NOCHANC  |
| DOWN     | NOCHANC  | NOCHANC  | DOWN     | NOCHANC  | NOCHANC  | DOWN     | UP       | UP       |
| NOCHANC  | NOCHANC  | NOCHANC  | NOCHANC  | UP       | UP       | UP       | NOCHANC  | NOCHANC  |
| UP       | DOWN     | NOCHANC  | NOCHANC  | NOCHANC  | NOCHANC  | NOCHANC  | UP       | NOCHANC  |
| NOCHANC  | NOCHANC  | NOCHANC  | NOCHANC  | NOCHANC  | NOCHANC  | NOCHANC  | UP       | NOCHANC  |
| DOWN     | NOCHANC  | NOCHANC  | DOWN     | NOCHANC  | DOWN     | DOWN     | DOWN     | DOWN     |
| DOWN     | DOWN     | DOWN     | DOWN     | NOCHANC  | NOCHANC  | DOWN     | DOWN     | UP       |
| DOWN     | NOCHANC  | NOCHANC  | DOWN     | NOCHANC  | NOCHANC  | NOCHANC  | UP       | NOCHANC  |
| NOCHANC  | DOWN     | NOCHANC  | NOCHANC  | NOCHANC  | NOCHANC  | DOWN     | NOCHANC  | DOWN     |
| UP       | NOCHANC  | UP       | UP       | UP       | UP       | UP       | UP       | UP       |
| NOCHANC  | NOCHANC  | DOWN     | DOWN     | NOCHANC  | NOCHANC  | NOCHANC  | NOCHANC  | UP       |
| NOCHANC  | NOCHANC  | NOCHANC  | NOCHANC  | DOWN     | NOCHANC  | NOCHANC  | NOCHANC  | NOCHANC  |
| NOCHANC  | NOCHANC  | NOCHANC  | NOCHANC  | DOWN     | NOCHANC  | DOWN     | NOCHANC  | NOCHANC  |
| DOWN     | NOCHANC  | DOWN     | DOWN     | DOWN     | DOWN     | DOWN     | NOCHANC  | NOCHANC  |
| DOWN     | UP       | NOCHANC  | NOCHANC  | NOCHANC  | NOCHANC  | NOCHANC  | NOCHANC  | UP       |
| NOCHANC  | NOCHANC  | NOCHANC  | NOCHANC  | NOCHANC  | UP       | NOCHANC  | NOCHANC  | UP       |
| DOWN     | NOCHANC  | NOCHANC  | NOCHANC  | NOCHANC  | DOWN     | DOWN     | UP       | UP       |
| UP       | NOCHANC  | NOCHANC  | UP       | NOCHANC  | NOCHANC  | DOWN     | NOCHANC  | UP       |
| NOCHANC  | DOWN     | NOCHANC  | DOWN     | NOCHANC  | NOCHANC  | NOCHANC  | NOCHANC  | DOWN     |
| NOCHANC  | DOWN     | NOCHANC  | NOCHANC  | UP       | NOCHANC  | UP       | NOCHANC  | UP       |
| NOCHANC  | NOCHANC  | NOCHANC  | NOCHANC  | NOCHANC  | NOCHANC  | NOCHANC  | NOCHANC  | NOCHANC  |
| NOCHANC  | DOWN     | UP       | UP       | UP       | NOCHANC  | UP       | NOCHANC  | NOCHANC  |
| NOCHANC  | NOCHANC  | NOCHANC  | DOWN     | NOCHANC  | DOWN     | NOCHANC  | UP       | DOWN     |
| DOWN     | DOWN     | DOWN     | DOWN     | NOCHANC  | DOWN     | DOWN     | NOCHANC  | DOWN     |
| UP       | DOWN     | UP       | UP       | UP       | NOCHANC  | NOCHANC  | UP       | UP       |
| DOWN     | NOCHANC  | UP       | DOWN     | UP       | UP       | UP       | NOCHANC  | DOWN     |
| UP       | NOCHANC  | DOWN     | NOCHANC  | NOCHANC  | UP       | NOCHANC  | UP       | UP       |

| TCGA-B0- | TCGA-BP- | TCGA-DV- | TCGA-BP- | TCGA-AK- | TCGA-CW | TCGA-B0- | TCGA-B8- | TCGA-B0- |
|----------|----------|----------|----------|----------|---------|----------|----------|----------|
| DOWN     | DOWN     | DOWN     | DOWN     | NOCHAN(  | NOCHAN( | NOCHAN(  | DOWN     | DOWN     |
| NOCHAN(  | DOWN     | NOCHAN(  | NOCHAN(  | NOCHAN(  | NOCHAN( | NOCHAN(  | NOCHAN(  | DOWN     |
| DOWN     | DOWN     | DOWN     | DOWN     | UP       | DOWN    | DOWN     | DOWN     | DOWN     |
| NOCHAN(  | NOCHAN(  | NOCHAN(  | NOCHAN(  | NOCHAN(  | NOCHAN( | NOCHAN(  | UP       | UP       |
| NOCHAN(  | NOCHAN(  | DOWN     | NOCHAN(  | NOCHAN(  | NOCHAN( | NOCHAN(  | NOCHAN(  | NOCHAN(  |
| NOCHAN(  | DOWN     | NOCHAN(  | DOWN     | NOCHAN(  | DOWN    | DOWN     | NOCHAN(  | DOWN     |
| DOWN     | DOWN     | DOWN     | NOCHAN(  | UP       | DOWN    | NOCHAN(  | NOCHAN(  | DOWN     |
| NOCHAN(  | NOCHAN(  | NOCHAN(  | NOCHAN(  | NOCHAN(  | NOCHAN( | UP       | NOCHAN(  | NOCHAN(  |
| NOCHAN(  | UP       | NOCHAN(  | NOCHAN(  | DOWN     | UP      | UP       | UP       | UP       |
| DOWN     | DOWN     | NOCHAN(  | NOCHAN(  | NOCHAN(  | NOCHAN( | DOWN     | DOWN     | DOWN     |
| NOCHAN(  | NOCHAN(  | NOCHAN(  | NOCHAN(  | NOCHAN(  | NOCHAN( | NOCHAN(  | NOCHAN(  | NOCHAN(  |
| NOCHAN(  | DOWN     | NOCHAN(  | NOCHAN(  | NOCHAN(  | NOCHAN( | NOCHAN(  | NOCHAN(  | NOCHAN(  |
| NOCHAN(  | DOWN     | NOCHAN(  | NOCHAN(  | DOWN     | NOCHAN( | DOWN     | DOWN     | NOCHAN(  |
| NOCHAN(  | NOCHAN(  | NOCHAN(  | NOCHAN(  | NOCHAN(  | NOCHAN( | NOCHAN(  | DOWN     | NOCHAN(  |
| NOCHAN(  | DOWN     | NOCHAN(  | NOCHAN(  | NOCHAN(  | NOCHAN( | NOCHAN(  | NOCHAN(  | NOCHAN(  |
| NOCHAN(  | NOCHAN(  | NOCHAN(  | NOCHAN(  | NOCHAN(  | UP      | UP       | NOCHAN(  | NOCHAN(  |
| NOCHAN(  | DOWN     | NOCHAN(  | NOCHAN(  | UP       | NOCHAN( | NOCHAN(  | NOCHAN(  | NOCHAN(  |
| UP       | NOCHAN(  | NOCHAN(  | NOCHAN(  | DOWN     | NOCHAN( | UP       | UP       | NOCHAN(  |
| DOWN     | DOWN     | DOWN     | DOWN     | UP       | DOWN    | DOWN     | DOWN     | DOWN     |
| DOWN     | DOWN     | DOWN     | DOWN     | DOWN     | DOWN    | DOWN     | DOWN     | NOCHAN(  |
| DOWN     | DOWN     | DOWN     | DOWN     | UP       | NOCHAN( | DOWN     | DOWN     | DOWN     |
| DOWN     | NOCHAN(  | NOCHAN(  | NOCHAN(  | NOCHAN(  | NOCHAN( | NOCHAN(  | DOWN     | DOWN     |
| UP       | UP       | UP       | UP       | DOWN     | UP      | UP       | UP       | UP       |
| NOCHAN(  | DOWN     | DOWN     | NOCHAN(  | UP       | NOCHAN( | NOCHAN(  | NOCHAN(  | NOCHAN(  |
| NOCHAN(  | DOWN     | DOWN     | NOCHAN(  | NOCHAN(  | NOCHAN( | UP       | NOCHAN(  | NOCHAN(  |
| DOWN     | DOWN     | NOCHAN(  | NOCHAN(  | NOCHAN(  | NOCHAN( | UP       | NOCHAN(  | NOCHAN(  |
| NOCHAN(  | DOWN     | DOWN     | NOCHAN(  | NOCHAN(  | DOWN    | DOWN     | NOCHAN(  | DOWN     |
| DOWN     | DOWN     | NOCHAN(  | NOCHAN(  | NOCHAN(  | NOCHAN( | NOCHAN(  | DOWN     | NOCHAN(  |
| NOCHAN(  | DOWN     | UP       | NOCHAN(  | NOCHAN(  | NOCHAN( | NOCHAN(  | UP       | UP       |
| NOCHAN(  | DOWN     | NOCHAN(  | NOCHAN(  | NOCHAN(  | DOWN    | NOCHAN(  | NOCHAN(  | NOCHAN(  |
| NOCHAN(  | UP       | NOCHAN(  | NOCHAN(  | NOCHAN(  | NOCHAN( | UP       | NOCHAN(  | UP       |
| NOCHAN(  | DOWN     | NOCHAN(  | DOWN     | NOCHAN(  | NOCHAN( | DOWN     | NOCHAN(  | NOCHAN(  |
| UP       | DOWN     | NOCHAN(  | UP       | NOCHAN(  | NOCHAN( | UP       | NOCHAN(  | UP       |
| NOCHAN(  | NOCHAN(  | NOCHAN(  | NOCHAN(  | NOCHAN(  | NOCHAN( | NOCHAN(  | NOCHAN(  | NOCHAN(  |
| NOCHAN(  | NOCHAN(  | UP       | DOWN     | DOWN     | NOCHAN( | DOWN     | NOCHAN(  | UP       |
| DOWN     | DOWN     | NOCHAN(  | NOCHAN(  | UP       | NOCHAN( | NOCHAN(  | DOWN     | NOCHAN(  |
| DOWN     | DOWN     | DOWN     | DOWN     | NOCHAN(  | DOWN    | DOWN     | DOWN     | DOWN     |
| NOCHAN(  | DOWN     | NOCHAN(  | NOCHAN(  | UP       | UP      | NOCHAN(  | NOCHAN(  | UP       |
| NOCHAN(  | DOWN     | UP       | UP       | NOCHAN(  | UP      | NOCHAN(  | NOCHAN(  | DOWN     |
| NOCHAN(  | NOCHAN(  | NOCHAN(  | UP       | NOCHAN(  | NOCHAN( | NOCHAN(  | UP       | UP       |

| TCGA-BP | TCGA-EU | TCGA-BP | TCGA-B0 | TCGA-DV | TCGA-MN | TCGA-BP | TCGA-CJ | TCGA-A3 |
|---------|---------|---------|---------|---------|---------|---------|---------|---------|
| NOCHANC | DOWN    | DOWN    | NOCHANC | DOWN    | NOCHANC | DOWN    | DOWN    | DOWN    |
| DOWN    | NOCHANC | NOCHANC | NOCHANC | NOCHANC | DOWN    | NOCHANC | NOCHANC | DOWN    |
| DOWN    | DOWN    | DOWN    | DOWN    | DOWN    | DOWN    | DOWN    | DOWN    | DOWN    |
| NOCHANC | NOCHANC | NOCHANC | NOCHANC | NOCHANC | UP      | NOCHANC | NOCHANC | UP      |
| NOCHANC | NOCHANC | NOCHANC | DOWN    | NOCHANC | NOCHANC | NOCHANC | NOCHANC | NOCHANC |
| DOWN    | NOCHANC | DOWN    | NOCHANC | NOCHANC | DOWN    | DOWN    | DOWN    | DOWN    |
| DOWN    | DOWN    | DOWN    | DOWN    | DOWN    | DOWN    | NOCHANC | NOCHANC | DOWN    |
| NOCHANC | NOCHANC | NOCHANC | NOCHANC | NOCHANC | NOCHANC | NOCHANC | UP      | NOCHANC |
| UP      | NOCHANC | UP      | NOCHANC | UP      | UP      | UP      | UP      | UP      |
| DOWN    | NOCHANC | DOWN    | NOCHANC | DOWN    | DOWN    | NOCHANC | DOWN    | DOWN    |
| UP      | NOCHANC | NOCHANC | NOCHANC | NOCHANC | NOCHANC | NOCHANC | NOCHANC | NOCHANC |
| NOCHANC | NOCHANC | NOCHANC | NOCHANC | DOWN    | NOCHANC | NOCHANC | NOCHANC | NOCHANC |
| NOCHANC | NOCHANC | NOCHANC | NOCHANC | DOWN    | NOCHANC | NOCHANC | DOWN    | NOCHANC |
| NOCHANC | NOCHANC | NOCHANC | NOCHANC | NOCHANC | NOCHANC | NOCHANC | NOCHANC | UP      |
| DOWN    | NOCHANC | NOCHANC | DOWN    | NOCHANC | NOCHANC | NOCHANC | NOCHANC | NOCHANC |
| NOCHANC | NOCHANC | NOCHANC | NOCHANC | NOCHANC | NOCHANC | NOCHANC | NOCHANC | NOCHANC |
| UP      | NOCHANC | NOCHANC | DOWN    | NOCHANC | NOCHANC | NOCHANC | NOCHANC | NOCHANC |
| NOCHANC | UP      | NOCHANC | NOCHANC | NOCHANC | NOCHANC | NOCHANC | NOCHANC | NOCHANC |
| DOWN    | NOCHANC | DOWN    | DOWN    | NOCHANC | DOWN    | NOCHANC | DOWN    | DOWN    |
| DOWN    | DOWN    | DOWN    | DOWN    | NOCHANC | NOCHANC | DOWN    | DOWN    | NOCHANC |
| DOWN    | NOCHANC | DOWN    | NOCHANC | NOCHANC | DOWN    | NOCHANC | DOWN    | DOWN    |
| NOCHANC | NOCHANC | NOCHANC | NOCHANC | DOWN    | NOCHANC | NOCHANC | NOCHANC | NOCHANC |
| UP      | UP      | UP      | UP      | NOCHANC | UP      | UP      | UP      | UP      |
| DOWN    | NOCHANC | NOCHANC | DOWN    | NOCHANC | NOCHANC | NOCHANC | NOCHANC | DOWN    |
| NOCHANC | NOCHANC | NOCHANC | NOCHANC | NOCHANC | NOCHANC | NOCHANC | NOCHANC | NOCHANC |
| NOCHANC | NOCHANC | DOWN    | NOCHANC | NOCHANC | NOCHANC | NOCHANC | NOCHANC | NOCHANC |
| DOWN    | NOCHANC | DOWN    | DOWN    | NOCHANC | DOWN    | DOWN    | DOWN    | DOWN    |
| NOCHANC | NOCHANC | NOCHANC | NOCHANC | DOWN    | NOCHANC | NOCHANC | NOCHANC | NOCHANC |
| NOCHANC | NOCHANC | NOCHANC | UP      | UP      | NOCHANC | NOCHANC | NOCHANC | UP      |
| DOWN    | DOWN    | NOCHANC | DOWN    | NOCHANC | NOCHANC | DOWN    | NOCHANC | NOCHANC |
| NOCHANC | NOCHANC | NOCHANC | NOCHANC | DOWN    | UP      | NOCHANC | NOCHANC | NOCHANC |
| DOWN    | NOCHANC | NOCHANC | NOCHANC | NOCHANC | DOWN    | NOCHANC | DOWN    | DOWN    |
| NOCHANC | NOCHANC | NOCHANC | NOCHANC | NOCHANC | NOCHANC | NOCHANC | NOCHANC | NOCHANC |
| NOCHANC | NOCHANC | NOCHANC | NOCHANC | NOCHANC | UP      | NOCHANC | NOCHANC | NOCHANC |
| NOCHANC | NOCHANC | UP      | UP      | NOCHANC | NOCHANC | UP      | UP      | NOCHANC |
| NOCHANC | NOCHANC | NOCHANC | NOCHANC | DOWN    | NOCHANC | NOCHANC | DOWN    | NOCHANC |
| DOWN    | DOWN    | DOWN    | DOWN    | NOCHANC | DOWN    | DOWN    | DOWN    | DOWN    |
| NOCHANC | NOCHANC | UP      | NOCHANC | NOCHANC | UP      | NOCHANC | UP      | NOCHANC |
| DOWN    | UP      | NOCHANC | UP      | UP      | NOCHANC | UP      | NOCHANC | NOCHANC |
| UP      | NOCHANC | NOCHANC | NOCHANC | UP      | NOCHANC | UP      | NOCHANC | UP      |

| TCGA-B0- | TCGA-DV | TCGA-AK- | TCGA-B0- | TCGA-B0- | TCGA-BP- | TCGA-B8- | TCGA-CZ- | TCGA-DV- |
|----------|---------|----------|----------|----------|----------|----------|----------|----------|
| DOWN     | DOWN    | NOCHAN   | DOWN     | DOWN     | NOCHAN   | DOWN     | DOWN     | NOCHAN   |
| DOWN     | DOWN    | NOCHAN   | DOWN     | NOCHAN   | DOWN     | NOCHAN   | NOCHAN   | NOCHAN   |
| DOWN     | DOWN    | NOCHAN   | DOWN     | DOWN     | DOWN     | UP       | DOWN     | DOWN     |
| UP       | NOCHAN  | NOCHAN   | UP       | NOCHAN   | UP       | DOWN     | NOCHAN   | NOCHAN   |
| NOCHAN   | NOCHAN  | NOCHAN   | NOCHAN   | NOCHAN   | DOWN     | DOWN     | NOCHAN   | NOCHAN   |
| DOWN     | DOWN    | NOCHAN   | DOWN     | DOWN     | NOCHAN   | UP       | DOWN     | NOCHAN   |
| DOWN     | DOWN    | UP       | DOWN     | NOCHAN   | UP       | NOCHAN   | NOCHAN   | DOWN     |
| NOCHAN   | NOCHAN  | NOCHAN   | NOCHAN   | UP       | DOWN     | DOWN     | NOCHAN   | NOCHAN   |
| UP       | UP      | NOCHAN   | NOCHAN   | NOCHAN   | UP       | DOWN     | UP       | UP       |
| DOWN     | DOWN    | NOCHAN   | DOWN     | DOWN     | DOWN     | UP       | DOWN     | NOCHAN   |
| NOCHAN   | NOCHAN  | NOCHAN   | NOCHAN   | NOCHAN   | NOCHAN   | UP       | NOCHAN   | NOCHAN   |
| NOCHAN   | NOCHAN  | NOCHAN   | NOCHAN   | NOCHAN   | UP       | DOWN     | DOWN     | NOCHAN   |
| NOCHAN   | NOCHAN  | NOCHAN   | NOCHAN   | NOCHAN   | NOCHAN   | UP       | NOCHAN   | NOCHAN   |
| NOCHAN   | NOCHAN  | NOCHAN   | UP       | NOCHAN   | UP       | DOWN     | NOCHAN   | NOCHAN   |
| DOWN     | NOCHAN  | NOCHAN   | NOCHAN   | NOCHAN   | DOWN     | DOWN     | NOCHAN   | NOCHAN   |
| UP       | UP      | NOCHAN   | UP       | NOCHAN   | NOCHAN   | DOWN     | NOCHAN   | NOCHAN   |
| UP       | NOCHAN  | NOCHAN   | NOCHAN   | NOCHAN   | UP       | NOCHAN   | NOCHAN   | NOCHAN   |
| NOCHAN   | NOCHAN  | UP       | NOCHAN   | NOCHAN   | NOCHAN   | NOCHAN   | NOCHAN   | NOCHAN   |
| DOWN     | DOWN    | NOCHAN   | DOWN     | DOWN     | NOCHAN   | UP       | DOWN     | DOWN     |
| NOCHAN   | DOWN    | DOWN     | DOWN     | DOWN     | DOWN     | NOCHAN   | NOCHAN   | DOWN     |
| DOWN     | DOWN    | NOCHAN   | DOWN     | DOWN     | NOCHAN   | UP       | DOWN     | NOCHAN   |
| DOWN     | NOCHAN  | NOCHAN   | DOWN     | NOCHAN   | DOWN     | NOCHAN   | NOCHAN   | NOCHAN   |
| UP       | UP      | UP       | UP       | UP       | NOCHAN   | NOCHAN   | UP       | UP       |
| NOCHAN   | DOWN    | NOCHAN   | DOWN     | DOWN     | DOWN     | NOCHAN   | NOCHAN   | DOWN     |
| NOCHAN   | DOWN    | NOCHAN   | DOWN     | NOCHAN   | DOWN     | UP       | NOCHAN   | NOCHAN   |
| NOCHAN   | DOWN    | NOCHAN   | DOWN     | NOCHAN   | NOCHAN   | DOWN     | NOCHAN   | NOCHAN   |
| DOWN     | DOWN    | NOCHAN   | DOWN     | DOWN     | DOWN     | DOWN     | DOWN     | DOWN     |
| DOWN     | NOCHAN  | NOCHAN   | DOWN     | NOCHAN   | NOCHAN   | DOWN     | NOCHAN   | NOCHAN   |
| NOCHAN   | NOCHAN  | NOCHAN   | NOCHAN   | NOCHAN   | NOCHAN   | DOWN     | NOCHAN   | NOCHAN   |
| NOCHAN   | NOCHAN  | NOCHAN   | DOWN     | NOCHAN   | NOCHAN   | UP       | NOCHAN   | NOCHAN   |
| NOCHAN   | UP      | NOCHAN   | UP       | UP       | NOCHAN   | DOWN     | UP       | NOCHAN   |
| DOWN     | DOWN    | DOWN     | DOWN     | DOWN     | DOWN     | UP       | NOCHAN   | NOCHAN   |
| UP       | NOCHAN  | NOCHAN   | NOCHAN   | NOCHAN   | DOWN     | UP       | NOCHAN   | NOCHAN   |
| NOCHAN   | NOCHAN  | NOCHAN   | NOCHAN   | UP       | UP       | DOWN     | NOCHAN   | NOCHAN   |
| NOCHAN   | UP      | NOCHAN   | UP       | UP       | DOWN     | DOWN     | DOWN     | UP       |
| NOCHAN   | NOCHAN  | UP       | NOCHAN   | NOCHAN   | NOCHAN   | NOCHAN   | NOCHAN   | NOCHAN   |
| DOWN     | DOWN    | NOCHAN   | DOWN     | DOWN     | NOCHAN   | DOWN     | DOWN     | DOWN     |
| NOCHAN   | NOCHAN  | UP       | NOCHAN   | UP       | NOCHAN   | UP       | NOCHAN   | UP       |
| NOCHAN   | NOCHAN  | NOCHAN   | NOCHAN   | NOCHAN   | DOWN     | UP       | UP       | UP       |
| UP       | NOCHAN  | NOCHAN   | NOCHAN   | NOCHAN   | NOCHAN   | DOWN     | UP       | NOCHAN   |

-5575-01A-01R-1541-07

3E

**Table S8: uniCox analysis in KIRC**

| id        | HR      | HR.95L  | HR.95H  | pvalue   |
|-----------|---------|---------|---------|----------|
| age       | 1.0297  | 1.01588 | 1.04372 | 2.19E-05 |
| grade     | 2.28263 | 1.84053 | 2.83093 | 5.73E-14 |
| stage     | 1.92576 | 1.67699 | 2.21144 | 1.60E-20 |
| T         | 1.97255 | 1.66095 | 2.34262 | 9.65E-15 |
| M         | 4.49933 | 3.25415 | 6.22096 | 9.22E-20 |
| riskScore | 11.512  | 6.68473 | 19.8252 | 1.25E-18 |

**Table S9: multiCox analysis in KIRC**

| id        | HR      | HR.95L  | HR.95H  | pvalue   |
|-----------|---------|---------|---------|----------|
| age       | 1.03297 | 1.01805 | 1.04812 | 1.25E-05 |
| grade     | 1.30203 | 1.01919 | 1.66336 | 0.03468  |
| stage     | 1.63265 | 1.06679 | 2.49867 | 0.02396  |
| T         | 0.84674 | 0.57446 | 1.24809 | 0.40068  |
| M         | 1.37948 | 0.72059 | 2.64087 | 0.33157  |
| riskScore | 5.61022 | 3.10308 | 10.143  | 1.14E-08 |
